# Supplementary material
Source: ML conference proceedings conference paper supplement (https://proceedings.neurips.cc/paper_files/paper/2021/hash/42778ef0b5805a96f9511e20b5611fce-Abstract.html)
Supplement: Supplementary file 1 [file 42778ef0b5805a96f9511e20b5611fce-Supplemental.pdf]

# Covariance-Aware Private Mean Estimation Without Private Covariance Estimation

Gavin Brown\*

Marco Gaboardi†

Adam Smith‡

Jonathan Ullman§

Lydia Zakynthinou¶

October 26, 2021

## Abstract

We present two sample-efficient differentially private mean estimators for  $d$ -dimensional (sub)Gaussian distributions with unknown covariance. Informally, given  $n \gtrsim d/\alpha^2$  samples from such a distribution with mean  $\mu$  and covariance  $\Sigma$ , our estimators output  $\tilde{\mu}$  such that  $\|\tilde{\mu} - \mu\|_{\Sigma} \leq \alpha$ , where  $\|\cdot\|_{\Sigma}$  is the *Mahalanobis distance*. All previous estimators with the same guarantee either require strong a priori bounds on the covariance matrix or require  $\Omega(d^{3/2})$  samples.

Each of our estimators is based on a simple, general approach to designing differentially private mechanisms, but with novel technical steps to make the estimator private and sample-efficient. Our first estimator samples a point with approximately maximum Tukey depth using the exponential mechanism, but restricted to the set of points of large Tukey depth. Proving that this mechanism is private requires a novel analysis. Our second estimator perturbs the empirical mean of the data set with noise calibrated to the empirical covariance, without releasing the covariance itself. Its sample complexity guarantees hold more generally for subgaussian distributions, albeit with a slightly worse dependence on the privacy parameter. For both estimators, careful preprocessing of the data is required to satisfy differential privacy.

---

\*Department of Computer Science, Boston University. [grbrown@bu.edu](mailto:grbrown@bu.edu)

†Department of Computer Science, Boston University. [gaboardi@bu.edu](mailto:gaboardi@bu.edu)

‡Department of Computer Science, Boston University. [ads22@bu.edu](mailto:ads22@bu.edu)

§Khoury College of Computer Sciences, Northeastern University. [jullman@ccs.neu.edu](mailto:jullman@ccs.neu.edu)

¶Khoury College of Computer Sciences, Northeastern University. [zakynthinou.l@northeastern.edu](mailto:zakynthinou.l@northeastern.edu)

# Contents

|          |                                                          |           |
|----------|----------------------------------------------------------|-----------|
| <b>1</b> | <b>Introduction</b>                                      | <b>3</b>  |
| 1.1      | Techniques . . . . .                                     | 5         |
| 1.2      | Additional Related Work . . . . .                        | 7         |
| 1.3      | Organization . . . . .                                   | 8         |
| <b>2</b> | <b>Preliminaries</b>                                     | <b>8</b>  |
| <b>3</b> | <b>Tukey Depth Mechanism</b>                             | <b>9</b>  |
| 3.1      | Main Algorithm . . . . .                                 | 10        |
| 3.2      | Accuracy Analysis . . . . .                              | 10        |
| 3.2.1    | Relating Tukey Depth to Mahalanobis Distance . . . . .   | 10        |
| 3.2.2    | A Volume Condition for Safety . . . . .                  | 11        |
| 3.2.3    | Typical Gaussian Data Are Far from Unsafe . . . . .      | 13        |
| 3.2.4    | Restricted Exponential Mechanism is Accurate . . . . .   | 14        |
| <b>4</b> | <b>Empirically Rescaled Gaussian Mechanism</b>           | <b>15</b> |
| 4.1      | Accuracy Analysis . . . . .                              | 16        |
| 4.2      | Privacy Analysis . . . . .                               | 19        |
| 4.2.1    | Implications of Goodness . . . . .                       | 20        |
| 4.2.2    | Proof of Differential Privacy . . . . .                  | 20        |
|          | <b>Acknowledgements</b>                                  | <b>23</b> |
|          | <b>References</b>                                        | <b>23</b> |
| <b>A</b> | <b>Linear Algebra Background</b>                         | <b>28</b> |
| <b>B</b> | <b>Subgaussian Data</b>                                  | <b>29</b> |
| B.1      | Useful Facts and Definitions . . . . .                   | 29        |
| B.2      | Guarantees of Algorithm 2 for Subgaussian Data . . . . . | 30        |
| <b>C</b> | <b>Finite Implementations of Our Algorithms</b>          | <b>31</b> |
| C.1      | Technical Tools . . . . .                                | 31        |
| C.1.1    | Private Eigenvalue Estimation . . . . .                  | 32        |
| C.1.2    | Private Range Estimation . . . . .                       | 33        |
| C.2      | A Finite Implementation of Algorithm 1 . . . . .         | 34        |
| C.3      | A Finite Implementation of Algorithm 2 . . . . .         | 36        |
| <b>D</b> | <b>Additional Proofs</b>                                 | <b>40</b> |
| D.1      | Tukey-Depth Mechanism . . . . .                          | 40        |
| D.2      | Empirically Rescaled Gaussian Mechanism . . . . .        | 41        |
| D.2.1    | Implications of Goodness . . . . .                       | 41        |
| D.2.2    | Privacy analysis . . . . .                               | 43        |

# 1 Introduction

Although the goal of statistics and machine learning is to infer properties of a population, there is a growing awareness that many statistical estimators and trained models reveal a concerning amount of information about their data set, which leads to significant concerns about the *privacy* of the individuals who have contributed sensitive information to that data set. These privacy violations have been demonstrated repeatedly via *reconstruction attacks* [25, 35, 32, 55], *membership-inference attacks* [44, 65, 10, 38, 66, 77], and instances of unwanted *memorization of training data* [17, 18, 40, 7]. In order to realize the benefits of analyzing sensitive data sets, it is crucial to develop statistical estimators and machine learning algorithms that make accurate inferences about the population but also protect the privacy of the individuals who contribute data.

In this work we study statistical estimators that satisfy a condition called *differential privacy* [34], which has become the standard criterion for individual privacy in statistics and machine learning. Informally, a differentially private algorithm guarantees that no attacker, regardless of their background knowledge or resources, can infer much more about any individual than they could have learned had that individual never contributed to the data set [54]. A long body of work shows that differential privacy is compatible with a wide range of tasks in statistics and machine learning, and it is now seeing deployment at companies like Google [39, 6, 75], Apple [3], Facebook [70] and LinkedIn [64], as well as statistical agencies like the U.S. Census Bureau [1, 43].

**Background: Differentially Private Mean Estimation.** We revisit differentially private estimators for one of the most fundamental tasks in all of statistics and machine learning—given  $x_1, \dots, x_n \in \mathbb{R}^d$  sampled i.i.d. from a distribution with mean  $\mu \in \mathbb{R}^d$  and covariance  $\Sigma \in \mathbb{R}^{d \times d}$ , estimate the mean  $\mu$ . Mean estimation is not only an essential summary statistic in its own right, but also a building block for more sophisticated tasks like regression and stochastic optimization.

Without privacy constraints, the natural solution is to output the empirical mean  $\mu_x = \frac{1}{n} \sum_i x_i$ . The natural way to state the sample-complexity guarantee of the empirical mean is

$$n \gtrsim \frac{d}{\alpha^2} \implies \|\mu_x - \mu\|_{\Sigma} \leq \alpha,$$

where  $\gtrsim$  hides a universal multiplicative constant, and the accuracy guarantee holds with large constant probability (say, 0.99). Importantly,  $\|\mu_x - \mu\|_{\Sigma} = \|\Sigma^{-1/2}(\mu_x - \mu)\|_2$  is the error in *Mahalanobis distance* scaled to the covariance  $\Sigma$ . Bounding the error in Mahalanobis distance implies that in every direction  $v$ , the squared error is proportional to the variance  $v^T \Sigma v$  in that direction. The Mahalanobis distance is the natural way to measure the error for mean estimation, since it tightly captures the uncertainty about the true mean and is preserved under affine transformations.

Unfortunately, in high dimensions, releasing the empirical mean leads to concrete privacy breaches [38, 50]. A natural question is thus: can we design a differentially private mean estimator that performs nearly as well as the empirical mean?

Without making additional assumptions, the answer turns out to be no—every differentially private estimator incurs a large overhead in sample complexity compared to the empirical mean [51]. However, it is known that if we further assume that the distribution satisfies some additional concentration properties, we can do much better [67, 53, 50, 51]. In this work, we focus on one class of well-concentrated distributions, those that are *Gaussian* (or, in some of our results, *subgaussian*). Although assuming Gaussian data is restrictive, it is a natural starting point for understanding the complexity of estimation when the distribution is not pathological. Moreover, even in the Gaussian case, one cannot obtain error comparable to that of the empirical mean unless  $n \gtrsim d$  [10, 38, 50], so we will also focus on the case where the sample size is at least as large as the dimension.

For Gaussian data, if the analyst has prior information about the covariance matrix in the form of a matrix  $A$  and bound  $\kappa \geq 1$  such that  $A \leq \Sigma \leq \kappa A$ ,<sup>1</sup> then there is a folklore private estimator  $\mathcal{A}(x)$ , based on a line of work initiated by Karwa and Vadhan [53, 50, 5, 2], that finds an approximate range for the data, truncates the

<sup>1</sup>Given two covariance matrices  $A, B \in \mathbb{R}^{d \times d}$ , the notation  $A \leq B$  indicates that in every direction  $v \in \mathbb{R}^d$  the variance  $v^T B v$  is at least as large as  $v^T A v$ . More generally,  $A \leq B$  iff  $B - A$  is positive semidefinite.

points to within that range, and runs the Gaussian mechanism on the resulting empirical mean. This estimator achieves

$$n \gtrsim \frac{d}{\alpha^2} + \frac{d\sqrt{\kappa}}{\alpha\varepsilon} \implies \|\mathcal{A}(x) - \mu\|_{\Sigma} \leq \alpha, \quad (1)$$

where  $\varepsilon$  is the *privacy parameter* controlling the level of privacy (see Definition 2.2), with stronger privacy as  $\varepsilon \rightarrow 0$ .<sup>2</sup> Here  $\gtrsim$  hides a universal multiplicative constant and polylogarithmic factors of  $d$ ,  $\frac{1}{\delta}$ ,  $\frac{1}{\varepsilon}$  and  $\frac{1}{\alpha}$ ; the accuracy guarantee holds with large constant probability. We can interpret this result as showing that the additional cost of privacy is small provided that the user has a strong a priori bound on the covariance so that  $\kappa$  is small (e.g.  $\kappa$  is a constant), and also that the privacy guarantee is not too strong (e.g.  $\varepsilon \geq \alpha$ ). In particular, setting  $\kappa = 1$  corresponds to the *known-covariance* setting, where the guarantee in (1) is known to be minimax optimal up to polylogarithmic factors [38, 50] among all differentially private estimators.

However, the sample complexity in (1) grows asymptotically with  $\sqrt{\kappa}$ , a large price to pay for the user's uncertainty. Intuitively, this degradation arises because the algorithm perturbs the empirical mean  $\mu_x$  with noise from a *spherical* Gaussian distribution, whose magnitude must be proportional to the largest variance in any direction, so the noise is unnecessarily large in the directions with small variance. In contrast, when the user is very uncertain about the covariance, there are estimators with a weaker dependence on  $\kappa$  but a *superlinear* dependence on the dimension. In particular, there is an estimator [50, Theorem 4.3] with an error guarantee of the form

$$n \gtrsim \frac{d}{\alpha^2} + \frac{d}{\alpha\varepsilon} + \frac{d^{3/2} \log^{1/2} \kappa}{\varepsilon} \implies \|\mathcal{A}(x) - \mu\|_{\Sigma} \leq \alpha. \quad (2)$$

Here  $\gtrsim$  hides a universal multiplicative constant and logarithmic factors of  $d$ ,  $\frac{1}{\varepsilon}$ ,  $\frac{1}{\alpha}$ ,  $\log \kappa$ , and  $\rho$ , where  $\|\mu\|_2 \leq \rho$ ; the accuracy guarantee holds with large constant probability. Without any prior information about the covariance, the best known approach is to estimate the mean by learning the entire distribution—both mean and covariance—which is the more difficult task considered in [2, Theorem 4.6]. Doing so incurs an even worse dependence on the dimension:

$$n \gtrsim \frac{d^2}{\alpha^2} + \frac{d^2}{\alpha\varepsilon} \implies \|\mathcal{A}(x) - \mu\|_{\Sigma} \leq \alpha. \quad (3)$$

Here  $\gtrsim$  hides a universal multiplicative constant and logarithmic factors of  $\frac{1}{\delta}$  and  $\frac{1}{\alpha}$ ; the accuracy guarantee holds with large constant probability.

**The Covariance-Estimation Bottleneck.** The bottleneck in the algorithms above is privately obtaining a good spectral approximation to the covariance, i.e. a matrix  $A$  such that  $A \leq \Sigma \leq 2A$ . With such an estimate, one can apply the known-covariance approach in (1). Without privacy constraints, the empirical covariance will have this spectral-approximation property when the sample size is  $n \gtrsim d$ . However, all known private covariance estimators require  $n = \Omega(d^{3/2})$  samples, and there is evidence that this is an inherent limitation, as  $\Omega(d^{3/2})$  samples are necessary for solving this task for a worst-case data distribution [37].

**Our Work: Sample-Efficient Private Mean Estimation.** We circumvent this apparent difficulty of covariance estimation by designing an algorithm that adapts the noise it adds to the distribution's covariance without actually providing an explicit covariance estimate, nearly matching the optimal sample complexity (1) for the known-covariance setting.

**Theorem 1.1 (Informal).** *For  $\alpha \leq 1$ , there is an  $(\varepsilon, \delta)$ -differentially private estimator  $\mathcal{A}(\cdot)$  such that if  $x = (x_1, \dots, x_n)$  are sampled from  $\mathcal{N}(\mu, \Sigma)$  for unknown  $\mu$  and  $\Sigma$  of full rank,*

$$n \gtrsim \frac{d}{\alpha^2} + \frac{d}{\alpha\varepsilon} + \frac{\log(1/\delta)}{\varepsilon} \implies \|\mathcal{A}(x) - \mu\|_{\Sigma} \leq \alpha.$$

*The above guarantee holds with high probability over the sample  $x$  and the randomness of  $\mathcal{A}$ . Here  $\gtrsim$  hides a universal multiplicative constant and a logarithmic factor of  $\frac{1}{\alpha}$ .*

<sup>2</sup>To simplify the discussion, we focus only on the  $\varepsilon$  parameter, although our results and many of those we discuss require relaxations of differential privacy such as approximate [33] or concentrated [31, 8] differential privacy, which have different parameterizations.

For the formal statement, see Theorem 3.2. Our estimator is based on privately sampling a point of large *Tukey depth*. Tukey depth generalizes the notion of quantiles to multiple dimensions; it is known to be a good robust estimator of the Gaussian mean. The natural way to sample such a point privately is to use the *exponential mechanism* (as in the concurrent work of [58]), but sampling from a distribution over the entire domain  $\mathbb{R}^d$  will not have finite sample complexity. Our innovation is to sample from a *data-dependent* domain consisting only of points of large Tukey depth, which necessitates careful preprocessing and privacy analysis.

We emphasize that the sample complexity of this estimator is optimal up to polylogarithmic factors. However, the estimator is not computationally efficient. An interesting open problem is to design an estimator matching the guarantee of Theorem 1.1 with running time polynomial in the dimension.

**Beyond Gaussian Distributions.** A natural question is how much the assumption of Gaussian data can be relaxed without blowing up the sample complexity. Our second result is an alternative estimator, based on a completely different technique, that will give a similar guarantee for any distribution with *subgaussian tails*. For our purposes, we say that  $P$  with mean  $\mu$  and covariance  $\Sigma$  is subgaussian if, for every direction  $u \in \mathbb{R}^d$ , the tails of the distribution decay as fast as a univariate normal distribution with mean  $u^T \mu$  and variance  $Cu^T \Sigma u$  for some constant  $C$ . That is, for every  $\lambda$ ,

$$\mathbb{E}[e^{\lambda u^T (P - \mu)}] \leq e^{C\lambda^2 (u^T \Sigma u)/2}.$$

More generally, our estimator works for any distribution such that the empirical covariance matrix converges rapidly to the population covariance matrix and typical samples are close to the mean in Mahalanobis distance (see (5)).

**Theorem 1.2 (Informal).** *For  $\alpha \leq 1$ , there is an  $(\epsilon, \delta)$ -differentially private estimator  $\mathcal{A}(\cdot)$  such that if  $x = (x_1, \dots, x_n)$  are sampled from any subgaussian distribution with unknown mean  $\mu$  and unknown covariance  $\Sigma$  of full rank,*

$$n \gtrsim \frac{d}{\alpha^2} + \frac{d \log(1/\delta)}{\alpha \epsilon^2} \implies \|\mathcal{A}(x) - \mu\|_{\Sigma} \leq \alpha.$$

*The above guarantee holds with high probability over the sample  $x$  and the randomness of  $\mathcal{A}$ . Here  $\gtrsim$  hides a universal multiplicative constant and polylogarithmic factors of  $d$ ,  $\frac{1}{\delta}$ ,  $\frac{1}{\epsilon}$ , and  $\frac{1}{\alpha}$ .*

For the relevant formal statement, see Theorem 4.3 and its extension to subgaussian data in Theorem B.6. This estimator is based on another simple approach—we perturb the empirical mean  $\mu_x$  with noise scaled to  $\Sigma_x$ , where  $\Sigma_x$  is the exact (not private) empirical covariance. We show that this approach satisfies differential privacy if the data set satisfies certain concentration properties, which we enforce using a careful preprocessing step.

Both of our estimators generalize beyond Gaussian distributions in different directions, not fully captured by our theorems. Although the Tukey depth estimator will only return an approximation to the mean when the distribution is symmetric and will not generalize to arbitrary subgaussian distributions, it returns an approximate *median* for distributions satisfying some natural regularity conditions. In contrast, the empirically rescaled estimator generalizes to distributions that are well-concentrated, in the sense that typical samples from the distribution are close to the mean in Mahalanobis distance with respect to the empirical covariance, which captures much more than just subgaussian distributions. Exploring the extent to which each estimator can be generalized is an interesting direction for future work.

## 1.1 Techniques

**Tukey-depth Mechanism.** Our first algorithm adapts a well-known approach to estimating the location of a distribution with differential privacy. Briefly, we sample from the distribution defined by the exponential mechanism [61] based on the Tukey depth, but restricted to a data-dependent set of possible outputs—those points with Tukey depth at least  $\frac{1}{4}$ . To ensure differential privacy, we add a private check that the data set is “safe,” which we perform before running the main mechanism.

In more detail, our starting point is the *exponential mechanism* [61]. In this context, the exponential mechanism samples a point  $y \in \mathbb{R}^d$  from the distribution with probability density roughly proportional to  $\exp(-\varepsilon q(x; y))$ , where  $q(x; y)$  is a score function that indicates how good a match  $y$  is for the data set at hand. To instantiate the mechanism, one must choose (i) a score function that rewards values  $y$  that are close to mean  $\mu$  in the unknown Mahalanobis metric, and (ii) a set of candidate values  $y$  from which to sample. For (i), we choose  $q(x; y) = nT_x(y)$  where  $T_x$  is the *Tukey depth* of a point, defined as

$$T_x(y) = \frac{1}{n} \cdot \min_{v \in \mathbb{R}^d} \left| \{x_i \in x : \langle x_i, v \rangle \geq \langle y, v \rangle\} \right|. \quad (4)$$

For normally distributed data, the Tukey depth ranges from 0 (outside the convex hull of the data points) to about  $1/2$  (near the mean  $\mu$ ). The point of maximal Tukey depth, called the *Tukey median*, is well-known as a robust estimator of the mean of a Gaussian distribution. In general, the expectation of Tukey depth over the draw of the data can be cleanly described in terms of the Gaussian cumulative distribution function. See the supplementary material for further technical details.

Using the exponential mechanism with Tukey depth as the score function is a well-established idea. In one dimension, it is now the standard algorithm for approximating the median (e.g. [67]), and its high-dimensional variant was studied in previous [52] and concurrent [58] work.<sup>3</sup> However, on its own, it is not sufficient for our needs. The challenge is in specifying the set of potential outputs  $y$  from which we sample (step (ii) above). In order to reliably output a value  $y$  such that  $\|y - \mu\|_\Sigma$  is small, we must sample from a set of outputs with  $\Sigma$ -norm that is not too large. For that, however, it would seem that one needs a rough approximation to  $\Sigma$ , which is exactly what we want to avoid.

We circumvent the barrier by sampling from a data-defined set *without releasing a description of that set*. Specifically, consider the algorithm which samples from the exponential mechanism restricted to points with Tukey depth at least  $1/4$ . A standard concentration argument shows that this set is roughly the ellipsoid  $\{y : \|y - \mu\|_\Sigma \leq c\}$  for a modest constant  $c$ . Running the exponential mechanism on this set returns a good approximation to the mean (with  $\Sigma$ -norm  $o(1)$ ) when  $n = \omega(d/\varepsilon)$ .

This gives us an accurate algorithm, dubbed  $\mathcal{M}$ . The remaining challenge is that  $\mathcal{M}$  is not, on its own, differentially private. Specifically, there are data sets  $x$  for which the volume of the set of Tukey-depth- $1/4$  points changes drastically when a small number of records in  $x$  are changed. To address this, we identify a set of *safe* data sets  $x$ —these are data sets such that  $\mathcal{M}$  behaves similarly on all data sets  $x'$  that are neighbors of  $x$ . We show that normally distributed data sets are typically safe and, furthermore, require many insertions or deletions of records to be made unsafe. This allows us to apply the *propose-test-release* (PTR) framework of [30] to obtain an algorithm that is accurate for nicely distributed data and differentially private in the worst case.

Our modification of the exponential mechanism is quite general. It is similar in flavor to the GAP-MAX variant [13, 76, 19, 20, 21] as well as the top- $k$ -of- $k'$  approach of [29]. However, we do not know how to obtain our results using those variants since they are specific to the discrete setting and appear to require knowledge of the volume of the level sets of the score function. Such knowledge is not obviously available in our setting.

**Empirically Rescaled Gaussian Mechanism.** The well-known *Gaussian mechanism* perturbs the empirical mean  $\mu_x$  with noise drawn from  $\mathcal{N}(0, \sigma^2 \mathbb{I})$ , for a scale parameter  $\sigma$  that is chosen based on a priori information about the data. In particular,  $\sigma^2$  must scale linearly with  $\|\Sigma\|_2^2$ , the maximum variance in any direction. Since the noise is spherical, the error will be too large in directions with small variance, and so this mechanism cannot in general achieve a good estimate in Mahalanobis distance.

Our approach relies on the following simple idea: If the data set  $x$  is drawn i.i.d. from  $\mathcal{N}(\mu, \Sigma)$ , and the number of samples is a bit larger than the dimension  $d$ , then the empirical covariance  $\Sigma_x$  is a good approximation to the true covariance in spectral norm. When this holds, perturbing  $\mu_x$  with noise drawn

<sup>3</sup>We became aware of Liu et al.’s work [58] while we were working on this project. Our empirically rescaled Gaussian algorithm is entirely independent of their work, but the presentation and parts of the analysis of our Tukey-based algorithm were influenced by their approach.

Liu et al. consider, among other algorithms, a version of the Tukey depth algorithm where one samples from a fixed box whose dimensions are determined by a priori bounds on the covariance matrix. We analyze a more complex procedure, where the set from which one samples is data-dependent. Liu et al. aim to solve a different problem from the one we address here, but the two analyses overlap (notably in volume computations and concentration arguments that relate empirical Tukey depth to the underlying distribution).

from  $\mathcal{N}(0, C^2 \Sigma_x)$  for  $C \ll \frac{1}{\sqrt{d}}$  will be a good estimate of the mean in Mahalanobis distance. Thus, we want to understand when perturbing  $\mu_x$  in this way can be made differentially private.

Adding noise from  $\mathcal{N}(0, C^2 \Sigma_x)$  will not be private for worst-case data sets. To see this, consider a pair of adjacent data sets, one of which lies in a proper subspace of dimension  $d - 1$  and the other of which has full rank. For one of these data sets, our mean estimate will always lie in the proper subspace, while for the other it will lie outside of this subspace with probability 1, making the two cases easy to distinguish.

Our main observation is that such pathological examples should not arise when the data sets are sampled from a distribution, such as a Gaussian, that satisfies strong *concentration properties*. For example, if  $x$  and  $x'$  are adjacent data sets of i.i.d. samples from the same Gaussian, then  $\mu_x$  and  $\mu_{x'}$  will be similar, as will  $\Sigma_x$  and  $\Sigma_{x'}$ . To take advantage of these nice distributions, we define a family of “good data sets” that captures certain properties of typical samples from a Gaussian. Roughly, a data set  $x$  is *good* if  $\Sigma_x$  is invertible and, for every  $x_i$ ,

$$\|x_i - \mu_x\|_{\Sigma_x} \lesssim \sqrt{d \log n}. \quad (5)$$

Our main technical contribution is to show that if  $x$  and  $x'$  differ on a small number of samples, and both data sets are good, then their empirical means and empirical covariances are close. Thus,  $\mu_x + \mathcal{N}(0, C^2 \Sigma_x)$  and  $\mu_{x'} + \mathcal{N}(0, C^2 \Sigma_{x'})$  will be indistinguishable in the sense required for  $(\epsilon, \delta)$ -differential privacy.

However, we need to define our estimator on data sets that are *not* good in such a way that the estimator will be differentially private in the worst case. To do so, we privately test whether the input data set lies close to the good set and, if needed, we project the data into the family of good data sets. This preprocessing step will have no effect when the data is Gaussian, and any pair (Gaussian or not) of adjacent data sets  $x$  and  $x'$  will be mapped to a pair of good data sets  $\tilde{x}$  and  $\tilde{x}'$  that differ on a small number of examples.

This projection step is stated abstractly in Algorithm 2 as finding the minimizer over an infinite family of data sets. In Algorithm 7, we present a concrete, exponential-time algorithm that searches over a discrete grid of candidate datasets. We leave the task of identifying more efficient algorithms as an interesting problem for future work.

## 1.2 Additional Related Work

**Differentially Private Mean and Covariance Estimation.** The line of work most relevant to ours was initiated by Karwa and Vadhan [53], who established optimal private mean and variance estimators of univariate Gaussians with sample complexity  $\tilde{O}(1/\alpha^2 + 1/\alpha\epsilon)$ , without requiring a priori bounds on the parameters. Previously, Smith [67] gave estimators for asymptotically normal statistics (which include the mean of a Gaussian) with optimal convergence rates for a certain range of privacy parameters. In the multivariate setting, a series of works [50, 13, 2] gives algorithms for Gaussian mean estimation with known covariance that have a near-optimal sample complexity of  $\tilde{O}(d/\alpha^2 + d/\alpha\epsilon)$ . We note that [2] obtain the best bound among these works, but the guarantees of the estimator from [50] extend naturally to subgaussian distributions as well. [15] also studied mean and covariance estimation of subgaussian distributions, but their setting requires strong a priori bounds on the parameters. In concurrent work, [47] give a differentially private estimator for our unknown parameter setting which, for the same sample complexity as ours, has an error guarantee of  $\|\hat{\mu} - \mu\|_2 \leq \alpha \|\Sigma^{1/2}\|_2$ . This result is strictly weaker than ours. However, their estimator, in contrast to ours, has the pleasant property of being computationally efficient.

Beyond (sub)Gaussian distributions, [4, 9, 51] study differentially private mean estimation under weaker moment assumptions in the univariate and multivariate setting. [41, 49] study private mean estimation in the Gaussian case under the more strict constraint of local differential privacy.

When the covariance is unknown, a natural approach would be to estimate it and use one of the mean estimators above. In addition to the work we discuss in the introduction [50, 2], recent work focuses on practical private mean and covariance estimation in univariate [28] and multivariate [5] settings, although these approaches still require explicit private covariance estimation.

**Robust Statistical Estimation.** Robust statistical estimation [48, 60], which dates to at least 1960 [71] and remains an active area of research [22, 23, 24, 26, 45], studies the problem of estimating distribution parameters

when an  $\alpha$ -fraction of the data may be adversarially corrupted. As noted by Dwork and Lei [30], robust statistics and differential privacy have similar goals, and private estimators are often inspired by robust estimators, but the models are formally incomparable.

More recent work aims to give algorithms which satisfy both constraints simultaneously [58, 42]. Specifically, independently from our work, Liu et al. [58] propose a simple mechanism for Gaussian mean estimation with known covariance, given  $\alpha$ -corrupted data sets and an a priori bound on the range of the mean  $\|\mu\|_\infty \leq \rho$ . This estimator has sample complexity  $\tilde{O}(d/\alpha^2 + d \log \rho/\alpha\epsilon)$ . The algorithm runs the exponential mechanism [61] in the given range, using the Tukey depth of a point as its score. We observe that the same mechanism gives a solution for the problem we study—mean estimation in Mahalanobis distance with unknown covariance and no corruptions—but this solution requires a priori bounds on the mean and covariance, which are not required by our algorithms.

**Lower Bounds.** Starting from the univariate case, [53] prove that  $\Omega(\log(1/\delta)/\epsilon\alpha)$  samples are necessary for Gaussian estimation even when the variance is known. For multivariate mean estimation, the investigation of sample complexity lower bounds has been driven by *membership-inference attacks* (sometimes called *tracing* or *fingerprinting*) [10, 68, 12, 69, 38]. Using this technique, Kamath et al. [50] show a lower bound of  $\Omega(d/\alpha\epsilon)$  for Gaussian estimation with identity covariance, which clearly extends to our problem as well. The sample complexity of our estimators matches this lower bound up to logarithmic factors and has no dependence on a priori bounds on the parameters.

Moreover, we conjecture that any optimal differentially private Gaussian mean estimator with unknown covariance would have to go beyond current techniques, which compute a private estimate of the covariance matrix as an intermediate step. Recall that the best known sample complexity bound for privately computing a matrix  $A$  such that  $\mathbb{I} \leq A\Sigma A \leq 2\mathbb{I}$  for (sub)Gaussian distributions is  $\tilde{O}(d^{3/2} \log^{1/2} \kappa/\epsilon)$  [50]. In addition, Dwork et al. [37] gave a lower bound of  $\Omega(d^{3/2})$  for estimating the empirical covariance matrix, but only when the data is sampled from a worst-case distribution. Together, these results serve as evidence that  $\Omega(d^{3/2})$  samples are necessary for private covariance estimation even for the case of Gaussian data.

### 1.3 Organization

We first provide background on differential privacy (Section 2) and refer the reader to Appendix A for a review of the relevant linear algebra. In Section 3, we present our Tukey-Depth Mechanism and prove its privacy and sample complexity guarantees (c.f. Theorem 1.1). In Section 4, we present our Empirically Rescaled Gaussian Mechanism and prove its guarantees for Gaussian distributions; the extension to subgaussian data (c.f. Theorem 1.2) is in Appendix B. We present finite (yet computationally inefficient) implementations of both algorithms in Appendix C. Appendix D contains additional proofs which did not appear in the body of the paper.

## 2 Preliminaries

We write  $x \sim P$  to denote that  $x$  is drawn from distribution  $P$  and  $x \sim P^{\otimes n}$  if  $x$  consists of  $n$  i.i.d. draws from  $P$ . In particular, we consider data sets  $x = (x_1, \dots, x_n) \in \mathbb{R}^{n \times d}$  which consist of  $n$  i.i.d. samples, each drawn from a  $d$ -dimensional distribution  $P$  with mean  $\mu \in \mathbb{R}^d$  and covariance  $\Sigma \in \mathbb{R}^{d \times d}$ . We write  $[n] = \{1, \dots, n\}$ . We define the Hamming distance between two data sets  $x, y$  of size  $n$  by  $D_H(x, y) = |\{i \in [n] : x_i \neq y_i\}|$ . For data set  $x$  and set  $S \subseteq \mathbb{R}^{n \times d}$ , we write  $D_H(x, S) = \min_{z \in S} D_H(x, z)$ . We denote the natural logarithm by  $\log$ .

Let  $x, x' \in \mathcal{X}^n$  be two data sets of size  $n$ . We say that  $x, x'$  are *neighboring data sets* if  $D_H(x, x') \leq 1$ , and denote this by  $x \sim x'$ . Differentially private algorithms have *indistinguishable* output distributions on neighboring data sets.

**Definition 2.1** ( $(\epsilon, \delta)$ -indistinguishability). Two distributions  $P, Q$  over domain  $\mathcal{W}$  are  $(\epsilon, \delta)$ -indistinguishable, denoted by  $P \approx_{\epsilon, \delta} Q$ , if for any measurable subset  $W \subseteq \mathcal{W}$ ,

$$\Pr_{w \sim P}[w \in W] \leq e^\epsilon \Pr_{w \sim Q}[w \in W] + \delta \quad \text{and} \quad \Pr_{w \sim Q}[w \in W] \leq e^\epsilon \Pr_{w \sim P}[w \in W] + \delta.$$

**Definition 2.2** (Differential Privacy [34]). A randomized algorithm  $\mathcal{A}: \mathcal{X}^n \rightarrow \mathcal{W}$  is  $(\epsilon, \delta)$ -differentially private if for all neighboring datasets  $x, x'$  we have  $\mathcal{A}(x) \approx_{\epsilon, \delta} \mathcal{A}(x')$ .

A crucial property of differential privacy is that it composes adaptively. We say that  $M$  is an *adaptive composition* of  $M_1, \dots, M_T$  if it consists of a sequence of mechanisms  $M_1(x), M_2(x), \dots, M_T(x)$ , executed on data set  $x$ , where each mechanism  $M_t(x)$  depends on the outputs of  $M_1(x), \dots, M_{t-1}(x)$ .

**Lemma 2.3** (Composition [34]). If  $M_1, \dots, M_T$  are  $(\epsilon_1, \delta_1), \dots, (\epsilon_T, \delta_T)$ -differentially private respectively and  $M$  is their adaptive composition, then  $M$  is  $(\epsilon, \delta)$ -differentially private for  $\epsilon = \sum_{t=1}^T \epsilon_t$  and  $\delta = \sum_{t=1}^T \delta_t$ .

We next describe well-known mechanisms which serve as building blocks for our algorithms.

**Definition 2.4** (Laplace Mechanism [34]). Let  $f: \mathcal{X}^n \rightarrow \mathbb{R}$ , data set  $x \in \mathcal{X}^n$ , and privacy parameter  $\epsilon$ . The *Laplace Mechanism* returns

$$\tilde{f}(x) = f(x) + \text{Lap}\left(\frac{\Delta_f}{\epsilon}\right),$$

where  $\Delta_f = \max_{x \sim x'} |f(x) - f(x')|$  is the *global sensitivity* of  $f$ .

**Lemma 2.5** ([34]). The *Laplace Mechanism* is  $(\epsilon, 0)$ -differentially private.

**Definition 2.6** (Gaussian Mechanism, [34]). Let  $f: \mathcal{X}^n \rightarrow \mathbb{R}^d$ , data set  $x \in \mathcal{X}^n$ , and privacy parameters  $\epsilon, \delta$ . The *Gaussian Mechanism* returns

$$\tilde{f}(x) = f(x) + \mathcal{N}(0, \sigma^2 \mathbb{I}), \text{ where } \sigma = \Delta_f \sqrt{2 \log(1.25/\delta)}/\epsilon$$

and  $\Delta_f = \max_{x \sim x'} \|f(x) - f(x')\|_2$  is the *global  $\ell_2$ -sensitivity* of  $f$ .

**Lemma 2.7** ([34]). The *Gaussian Mechanism* is  $(\epsilon, \delta)$ -differentially private.

### 3 Tukey Depth Mechanism

We start with a score function  $q(x; y)$  and wish to sample from the exponential mechanism, proportional to  $\exp(\epsilon \cdot q(x; y)/2)$ , but restricting the sampling to the set of points with score at least  $t$ . Denote this set  $\mathcal{Y}_{t,x} = \{y \in \mathcal{Y} : q(x; y) \geq t\}$  and call the resulting distribution  $\mathcal{M}_{\epsilon,t}(x)$ . Unfortunately, sampling directly from  $\mathcal{M}_{\epsilon,t}(x)$  may not be private. To address this, we try to sample only from data sets that are “safe” with respect to privacy, i.e., have distributions that are indistinguishable from those of their neighbors.

**Definition 3.1** (Safety). Data set  $x$  is  $(\epsilon, \delta, t)$ -safe if, for all  $x' \sim x$ , we have  $\mathcal{M}_{\epsilon,t}(x) \approx_{\epsilon, \delta} \mathcal{M}_{\epsilon,t}(x')$ . Let  $\text{SAFE}_{(\epsilon, \delta, t)} \subseteq \mathcal{X}^n$  be the set of safe data sets, and let  $\text{UNSAFE}_{(\epsilon, \delta, t)} = \mathcal{X}^n \setminus \text{SAFE}_{(\epsilon, \delta, t)}$  be its complement.

Following the propose-test-release framework of [30], we check if the input is *far* from  $\text{UNSAFE}_{(\epsilon, \delta, t)}$ . Since the distance check itself is private and indistinguishability is the definition of safety, the proof of privacy becomes straightforward. Such an abstract definition, however, does not yield much insight into what safe data sets look like. Below, we show that one can establish safety via a simple condition on the volumes of sets of the form  $\mathcal{Y}_{t \pm \eta, x}$  (for certain values of  $\eta$ ), which allows us to show that Gaussian data are far from  $\text{UNSAFE}_{(\epsilon, \delta, t)}$  with high probability.

---

**Algorithm 1** Restricted Exponential Mechanism  $\mathcal{A}_{\epsilon, \delta, t}^E(x)$

---

**Require:** Data space  $\mathcal{X}$ . Output space  $\mathcal{Y} \cup \{\text{FAIL}\}$ . Data set  $x \in \mathcal{X}^n$ . Score function  $q: \mathcal{X}^n \times \mathcal{Y} \rightarrow \mathbb{R}$ , with global sensitivity 1 in the first argument. Privacy parameters  $\epsilon, \delta > 0$ . Minimum score  $t$ .

- 1:  $h \leftarrow D_H(x, \text{UNSAFE}_{(\epsilon, \delta, t)})$
  - 2: **if**  $h + z < \frac{\log(1/2\delta)}{\epsilon}$  **for**  $z \sim \text{Lap}(1/\epsilon)$  **then return** FAIL.
  - 3: **return**  $\hat{y} \sim \mathcal{M}_{\epsilon,t}(x)$ , where  $\mathcal{M}_{\epsilon,t}(x) \propto \begin{cases} \exp\left\{\frac{\epsilon q(x; y)}{2}\right\} & \text{if } y \in \mathcal{Y}_{t,x} \\ 0 & \text{otherwise} \end{cases}$
-

### 3.1 Main Algorithm

We estimate the mean by instantiating Algorithm 1 with  $t = n/4$  and score function  $q(x; y) = nT_x(y)$ , where  $T_x(y)$  is the (empirical) Tukey depth, defined as

$$T_x(y) \stackrel{\text{def}}{=} \min_{v \in \mathbb{R}^d} \frac{1}{n} \left| \{x_i \in x : \langle x_i, v \rangle \geq \langle y, v \rangle\} \right|. \quad (6)$$

Observe that  $nT_x(y)$  has sensitivity 1, since for any halfspace the fraction of points it contains can change by at most  $\frac{1}{n}$  when we change one data point.

**Theorem 3.2** (Privacy and Accuracy of the Tukey-Depth Mechanism). *For any  $\epsilon, \delta > 0$ , Algorithm 1 is  $(2\epsilon, e^\epsilon \delta)$ -differentially private. There exists an absolute constant  $C$  such that, for any  $0 < \alpha, \beta, \epsilon < 1$ ,  $0 < \delta \leq \frac{1}{2}$ , mean  $\mu$ , and positive definite  $\Sigma$ , if  $x \sim \mathcal{N}(\mu, \Sigma)^{\otimes n}$  and*

$$n \geq C \left( \frac{d + \log(1/\beta)}{\alpha^2} + \frac{d \log(1/\alpha) + \log(1/\beta)}{\alpha \epsilon} + \frac{\log(1/\delta)}{\epsilon} \right), \quad (7)$$

*then with probability at least  $1 - 3\beta$ , Algorithm 1 with  $q(x; y) = nT_x(y)$  returns  $\mathcal{A}_{\epsilon, \delta, n/4}^E(x) = \hat{\mu}$  such that  $\|\hat{\mu} - \mu\|_\Sigma \leq \alpha$ .*

In particular, setting  $\delta = \frac{1}{n^2}$  and  $\beta = \frac{1}{n}$ , it suffices to take a sample of size

$$n = \tilde{O} \left( \frac{d}{\alpha^2} + \frac{d}{\alpha \epsilon} \right).$$

### 3.2 Accuracy Analysis

The proof of accuracy proceeds in four stages. Using standard analysis, we first relate the empirical Tukey depth of a point  $y$  to its Mahalanobis distance  $\|y - \mu\|_\Sigma$  via the *expectation* of Tukey depth under  $\mathcal{N}(\mu, \Sigma)$ . Since Tukey depth is defined as a minimum over halfspaces, which have Vapnik-Chervonekis dimension  $d + 1$ , one can show via uniform convergence that the empirical measure concentrates around its expectation, with some error that we denote  $\alpha_1$ . This portion ends with a standard lemma relating the sets  $\mathcal{Y}_{np, x}$ , where  $p \in (0, 1/2)$ , to ellipsoids defined by Mahalanobis distance.

The remaining three steps, which are new to this work, begin with a characterization of the set SAFE defined above, which provides conditions under which a data set is far from UNSAFE. The third stage uses that characterization and the tools we developed to show that Gaussian data is typically far from UNSAFE, establishing that Algorithm 1 has a small probability of returning FAIL. Finally, conditioned on Algorithm 1 not returning FAIL, a similar analysis shows that with high probability the restricted sampler  $\mathcal{M}_{\epsilon, t}(x)$  returns a point with empirical Tukey depth at most  $\alpha_2$  far from optimal. Combined with the error  $\alpha_1$  from above, this yields a bound on the Mahalanobis distance to the true mean.

#### 3.2.1 Relating Tukey Depth to Mahalanobis Distance

The first steps in our analysis imply that, privacy considerations aside, points with high Tukey depth are good estimators for the Gaussian mean. These arguments are standard; for a recent application to differentially private estimation see the concurrent work of Liu et al. [58].

The *expected Tukey depth*,  $T_{\mathcal{N}(\mu, \Sigma)}$ , is a population version of the empirical fraction defined above. For brevity, we define  $P = \mathcal{N}(\mu, \Sigma)$  and write

$$T_{\mathcal{N}(\mu, \Sigma)}(y) = T_P(y) \stackrel{\text{def}}{=} \min_v \Pr_{X \sim P} [\langle X, v \rangle \geq \langle y, v \rangle]. \quad (8)$$

The expected Tukey depth is cleanly characterized in terms of Mahalanobis distance and  $\Phi$ , the CDF of the standard univariate Gaussian.<sup>4</sup> We restate and prove the following standard claim as Proposition D.2 in Appendix D.

<sup>4</sup>We also use  $\Phi^{-1}$ , the *quantile function*. Both  $\Phi$  and  $\Phi^{-1}$  are continuous and strictly increasing, and  $\Phi^{-1}$  satisfies  $-\Phi^{-1}(x) = \Phi^{-1}(1 - x)$ .

**Proposition 3.3.** For any  $\mu, y \in \mathbb{R}^d$  and positive definite  $\Sigma$ ,  $T_{N(\mu, \Sigma)}(y) = T_P(y) = \Phi(-\|y - \mu\|_\Sigma)$ .

To move between Mahalanobis distance and empirical Tukey depth, we require that the latter is close to its population analog. We call data sets where this holds “typical.”

**Definition 3.4** (Typicality). Data set  $x$  is  $\alpha_1$ -typical for  $\alpha_1 > 0$  if, for all  $y \in \mathbb{R}^d$ ,  $|T_x(y) - T_P(y)| \leq \alpha_1$ .

We now point out that the typical data set is, in fact,  $\alpha_1$ -typical. We use the fact that, since the set of halfspaces has VC dimension  $d + 1$ , we have uniform convergence between the empirical and expected fractions of data points in the halfspace [73]. Then (as discussed in [27]) one need only observe that this result carries over to Tukey depth, since it is defined in terms of halfspaces. See [14] for discussion of these and other convergence results. Our exact statment comes from the recent [58], which analyzes the exponential mechanism on Tukey depth for the purpose of robust and private mean estimation.

**Lemma 3.5** (Convergence of Tukey Depth, [73, 27, 58]). *There exists a constant  $c$  such that for any  $\alpha_1, \beta > 0$  if  $n \geq c \left( \frac{d + \log(1/\beta)}{\alpha_1^2} \right)$ , then  $x \sim \mathcal{N}(\mu, \Sigma)^{\otimes n}$  is  $\alpha_1$ -typical with probability at least  $1 - \beta$ .*

We will often manipulate subsets of points that have scores above a certain value, so let

$$\mathcal{Y}_{t,x} \stackrel{\text{def}}{=} \{y \in \mathcal{Y} : q(x; y) \geq t\}.$$

Note that, by construction,  $\mathcal{Y}_{t,x} = \text{supp}(\mathcal{M}_{\varepsilon,t}(x))$ . We will need to control the ratio of volumes of these spaces, and have the following useful lemma for  $\alpha_1$ -typical data sets.

**Lemma 3.6** (Volume Ratio). *Let  $p, q \in (0, 1/2)$ . If  $x$  is  $\alpha_1$ -typical, then*

$$\frac{\text{Vol}(\mathcal{Y}_{np,x})}{\text{Vol}(\mathcal{Y}_{nq,x})} \leq \left( \frac{\Phi^{-1}(1 - p + \alpha_1)}{\Phi^{-1}(1 - q - \alpha_1)} \right)^d. \quad (9)$$

*Proof.* Let  $\mathcal{B}_r$  denote the set of points  $y$  such that  $\|y - \mu\|_\Sigma \leq r$ . By definition,  $y \in \mathcal{Y}_{np,x} \Rightarrow T_x(y) \geq p$ . Thus, by typicality and Proposition 3.3,  $\Phi(-\|y - \mu\|_\Sigma) = T_P(y) \geq p - \alpha_1$ . Taking inverses, we have

$$\|y - \mu\|_\Sigma \leq -\Phi^{-1}(p - \alpha_1) = \Phi^{-1}(1 - p + \alpha_1). \quad (10)$$

So  $\mathcal{Y}_{np,x} \subseteq \mathcal{B}_{\Phi^{-1}(1-p+\alpha_1)}$ . Similarly, since  $\|y - \mu\|_\Sigma \leq \Phi^{-1}(1 - q - \alpha_1)$  implies  $T_P(y) \geq q + \alpha_1$ , we have that  $\mathcal{B}_{\Phi^{-1}(1-q-\alpha_1)} \subseteq \mathcal{Y}_{nq,x}$ . Using the fact that  $\text{Vol}(\mathcal{B}_r) = c_d |\Sigma|^{1/2} r^d$  (where  $c_d$  depends only on  $d$ ), we arrive at the claimed upper bound.  $\square$

### 3.2.2 A Volume Condition for Safety

We consider sets of the form  $\mathcal{Y}_{t+\eta,x}$  for moderate positive and negative values of  $\eta$ . Recall that  $\mathcal{Y}_{t+\eta,x}$  is the set of all points  $y$  with score  $q(x; y) = nT_x(y) \geq t + \eta$ , i.e., having empirical Tukey depth with respect to  $x$  at least  $(t + \eta)/n$ . Therefore, as  $\eta$  becomes smaller, the set  $\mathcal{Y}_{t+\eta,x}$  grows. We show that, if the volume of  $\mathcal{Y}_{t+\eta,x}$  does not increase too quickly as  $\eta$  decreases, then  $x$  is far from every data set in  $\text{UNSAFE}_{(\varepsilon, \delta, t)}$ . In particular, this implies that  $x$  itself is in  $\text{SAFE}_{(\varepsilon, \delta, t)}$ . These lemmas do not rely on specific features of Gaussian data or Tukey depth, which enter in only in the last two stages as described above, when we argue about typical data sets. This analysis, along with the remaining accuracy analysis of Algorithm 1, is new to this work.

Before arguing about volumes directly, we prove a lemma about the weight assigned to sets by the exponential mechanism. For any set  $S \subseteq \mathcal{Y}$ , denote its weight by  $w_x(S) = \int_S \exp\left\{\frac{\varepsilon q(x; y)}{2}\right\} dy$ .

**Lemma 3.7.** *Assume  $\delta < \frac{1}{2}$ . If  $w_x(\mathcal{Y}_{t+1,x}) \geq (1 - \delta)w_x(\mathcal{Y}_{t-1,x})$ , then  $x \in \text{SAFE}_{(\varepsilon, \delta', t)}$  for  $\delta' = 4e^\varepsilon \delta$ .*

*Proof.* First, observe that the hypothesis implies  $\frac{w_x(\mathcal{Y}_{t-1,x})}{w_x(\mathcal{Y}_{t+1,x})} \leq \frac{1}{1-\delta}$ . Since  $\frac{1}{1-\delta} = 1 + \delta + \delta^2 + \dots = 1 + \delta \left( \frac{1}{1-\delta} \right)$  and  $\delta \leq \frac{1}{2}$ , we have  $\frac{w_x(\mathcal{Y}_{t-1,x})}{w_x(\mathcal{Y}_{t+1,x})} \leq 1 + 2\delta$ .

Fix an event  $E \subseteq \mathcal{Y}$  and a data set  $x'$  adjacent to  $x$ . We show  $\Pr[\mathcal{M}_{\varepsilon,t}(x) \in E] \leq e^\varepsilon \Pr[\mathcal{M}_{\varepsilon,t}(x') \in E] + \delta'$  and  $\Pr[\mathcal{M}_{\varepsilon,t}(x') \in E] \leq e^\varepsilon \Pr[\mathcal{M}_{\varepsilon,t}(x) \in E] + \delta'$ , which, since  $x'$  is an arbitrary neighbor, establishes that  $x$  is safe. The work in the proof is to use our hypothesis about  $x$  to imply statements about  $x'$ , for which we have no explicit assumptions other than adjacency to  $x$ .

Let  $S = \mathcal{Y}_{t,x} \cap \mathcal{Y}_{t,x'}$  be the intersection of the supports of  $\mathcal{M}_{\varepsilon,t}(x)$  and  $\mathcal{M}_{\varepsilon,t}(x')$ . We have

$$\begin{aligned} \Pr[\mathcal{M}_{\varepsilon,t}(x) \in E] &= \Pr[\mathcal{M}_{\varepsilon,t}(x) \in E \cap S] + \Pr[\mathcal{M}_{\varepsilon,t}(x) \in E \setminus S] \\ &= \frac{\Pr[\mathcal{M}_{\varepsilon,t}(x) \in E \cap S]}{\Pr[\mathcal{M}_{\varepsilon,t}(x') \in E \cap S]} \Pr[\mathcal{M}_{\varepsilon,t}(x') \in E \cap S] + \Pr[\mathcal{M}_{\varepsilon,t}(x) \in E \setminus S] \\ &\leq \frac{\Pr[\mathcal{M}_{\varepsilon,t}(x) \in E \cap S]}{\Pr[\mathcal{M}_{\varepsilon,t}(x') \in E \cap S]} \Pr[\mathcal{M}_{\varepsilon,t}(x') \in E] + \Pr[\mathcal{M}_{\varepsilon,t}(x) \notin \mathcal{Y}_{t,x'}]. \end{aligned} \quad (11)$$

We upper bound the ratio by upper bounding it for any point  $y \in S$ . The normalizing constants for  $\mathcal{M}_{\varepsilon,t}(x)$  and  $\mathcal{M}_{\varepsilon,t}(x')$  may differ, and the score functions at  $y$  can differ by at most 1, so we have  $\frac{\Pr[\mathcal{M}_{\varepsilon,t}(x)=y]}{\Pr[\mathcal{M}_{\varepsilon,t}(x')=y]} \leq e^{\varepsilon/2} \cdot \frac{w_{x'}(\mathcal{Y}_{t,x'})}{w_x(\mathcal{Y}_{t,x})}$ . Using our assumption on the volumes, we can upper bound the ratio of normalizing constants as well. The first step to do so is straightforward: for any set  $A$ ,  $w_{x'}(A) \leq e^{\varepsilon/2} w_x(A)$ . The second inequality, however, is subtle and uses the sensitivity of  $q(\cdot; \cdot)$  in a different way: any point with score  $q(x'; y) \geq t$  has score  $q(x; y) \geq t - 1$ . Thus we have  $\mathcal{Y}_{t,x'} \subseteq \mathcal{Y}_{t-1,x}$  and can write

$$\begin{aligned} e^{\varepsilon/2} \cdot \frac{w_{x'}(\mathcal{Y}_{t,x'})}{w_x(\mathcal{Y}_{t,x})} &\leq e^\varepsilon \cdot \frac{w_x(\mathcal{Y}_{t,x'})}{w_x(\mathcal{Y}_{t,x})} \\ &\leq e^\varepsilon \cdot \frac{w_x(\mathcal{Y}_{t-1,x})}{w_x(\mathcal{Y}_{t+1,x})} \leq e^\varepsilon (1 + 2\delta). \end{aligned}$$

Similarly, we have  $\mathcal{Y}_{t+1,x} \subseteq \mathcal{Y}_{t,x'}$ . This allows us to apply our hypothesis a second time.

$$\Pr[\mathcal{M}_{\varepsilon,t}(x) \notin \mathcal{Y}_{t,x'}] \leq \Pr[\mathcal{M}_{\varepsilon,t}(x) \notin \mathcal{Y}_{t+1,x}] = 1 - \frac{w_x(\mathcal{Y}_{t+1,x})}{w_x(\mathcal{Y}_{t,x})} \leq 1 - \frac{w_x(\mathcal{Y}_{t+1,x})}{w_x(\mathcal{Y}_{t-1,x})} \leq \delta.$$

Thus, continuing from Equation (11), we have

$$\begin{aligned} \Pr[\mathcal{M}_{\varepsilon,t}(x) \in E] &\leq e^\varepsilon (1 + 2\delta) \Pr[\mathcal{M}_{\varepsilon,t}(x') \in E] + \delta \\ &\leq e^\varepsilon \Pr[\mathcal{M}_{\varepsilon,t}(x') \in E] + (1 + 2e^\varepsilon)\delta. \end{aligned}$$

We now upper bound for  $\Pr[\mathcal{M}_{\varepsilon,t}(x') \in E]$  in a similar manner. First,

$$\begin{aligned} \Pr[\mathcal{M}_{\varepsilon,t}(x') \notin \mathcal{Y}_{t,x}] &\leq \Pr[\mathcal{M}_{\varepsilon,t}(x') \in \mathcal{Y}_{t-1,x} \setminus \mathcal{Y}_{t,x}] = \frac{w_{x'}(\mathcal{Y}_{t-1,x} \setminus \mathcal{Y}_{t,x})}{w_{x'}(\mathcal{Y}_{t,x})} \\ &\leq e^\varepsilon \frac{w_x(\mathcal{Y}_{t-1,x} \setminus \mathcal{Y}_{t,x})}{w_x(\mathcal{Y}_{t,x})} \\ &= e^\varepsilon \frac{w_x(\mathcal{Y}_{t-1,x}) - w_x(\mathcal{Y}_{t,x})}{w_x(\mathcal{Y}_{t,x})}, \end{aligned} \quad (12)$$

where the first inequality holds since  $\text{supp}(\mathcal{M}_{\varepsilon,t}(x')) \setminus \mathcal{Y}_{t,x} = \{y \in \mathcal{Y} : q(x; y) = t - 1 \text{ and } q(x'; y) = t\} \subseteq \{y \in \mathcal{Y} : q(x; y) = t - 1\} = \mathcal{Y}_{t-1,x} \setminus \mathcal{Y}_{t,x}$ . Since  $\frac{w_x(\mathcal{Y}_{t-1,x})}{w_x(\mathcal{Y}_{t,x})} \leq \frac{w_x(\mathcal{Y}_{t-1,x})}{w_x(\mathcal{Y}_{t+1,x})} \leq 1 + 2\delta$ , (12) is at most  $2e^\varepsilon \delta$ . For the ratio, we have

$$\frac{\Pr[\mathcal{M}_{\varepsilon,t}(x') = y]}{\Pr[\mathcal{M}_{\varepsilon,t}(x) = y]} \leq e^{\varepsilon/2} \frac{w_x(\mathcal{Y}_{t,x})}{w_{x'}(\mathcal{Y}_{t,x'})} \leq e^\varepsilon \frac{w_x(\mathcal{Y}_{t,x})}{w_x(\mathcal{Y}_{t,x'})} \leq e^\varepsilon \frac{w_x(\mathcal{Y}_{t-1,x})}{w_x(\mathcal{Y}_{t+1,x})} \leq e^\varepsilon (1 + 2\delta).$$

Thus  $\Pr[\mathcal{M}_{\varepsilon,t}(x') \in E] \leq e^\varepsilon \Pr[\mathcal{M}_{\varepsilon,t}(x) \in E] + 4e^\varepsilon \delta$ .  $\square$

We now use this lemma to establish when a data set is far from the set of unsafe data sets. Note that setting  $k = 0$  below implies for all  $z \in \text{UNSAFE}$  that we have  $D_H(x, z) > 0$ , i.e.,  $x \in \text{SAFE}$ .

**Lemma 3.8.** *For any  $k \geq 0$ , if there exists a  $g > 0$  such that  $\frac{\text{Vol}(\mathcal{Y}_{t-k-1,x})}{\text{Vol}(\mathcal{Y}_{t+k+g+1,x})} \cdot e^{-\varepsilon g/2} \leq \delta$ , then for all  $z \in \text{UNSAFE}_{(\varepsilon, \delta', t)}$ , with  $\delta' = 4e^\varepsilon \delta$ , we have  $D_H(x, z) > k$*

*Proof.* Take some  $z$  at distance at most  $k$  from  $x$  (if  $k = 0$ , set  $z \leftarrow x$ ). We show  $z \in \text{SAFE}_{(\varepsilon, \delta', t)}$ . We have, from Lemma 3.7, that if  $\frac{w_z(\mathcal{Y}_{t+1,z})}{w_z(\mathcal{Y}_{t-1,z})} \geq 1 - \delta$ , then  $z$  is safe. This assumption is equivalent to  $\frac{w_z(\mathcal{Y}_{t-1,z} \setminus \mathcal{Y}_{t+1,z})}{w_z(\mathcal{Y}_{t-1,z})} \leq \delta$ , which is the form we use.

First we lower bound the denominator:

$$w_z(\mathcal{Y}_{t-1,z}) \geq w_z(\mathcal{Y}_{t+g+1,z}) \geq \text{Vol}(\mathcal{Y}_{t+g+1,z}) e^{\varepsilon(t+g+1)/2} \geq \text{Vol}(\mathcal{Y}_{t+g+k+1,x}) e^{\varepsilon(t+g+1)/2},$$

where (crucially) the last inequality switches to the volume under  $x$ , and we have used the sensitivity of  $q$ . We use the same idea on the numerator, switching to a volume under  $x$  in the first inequality:

$$w_z(\mathcal{Y}_{t-1,z} \setminus \mathcal{Y}_{t+1,z}) \leq w_z(\mathcal{Y}_{t-k-1,x} \setminus \mathcal{Y}_{t+1,z}) \leq \text{Vol}(\mathcal{Y}_{t-k-1,x}) e^{\varepsilon(t+1)/2}.$$

With an upper bound on the numerator, a lower bound on the denominator, and the fact that  $\frac{e^{\varepsilon(t+1)/2}}{e^{\varepsilon(t+g+1)/2}} = e^{-\varepsilon g/2}$ , we have

$$\frac{w_z(\mathcal{Y}_{t-1,z} \setminus \mathcal{Y}_{t+1,z})}{w_z(\mathcal{Y}_{t-1,z})} \leq \frac{\text{Vol}(\mathcal{Y}_{t-k-1,x})}{\text{Vol}(\mathcal{Y}_{t+k+g+1,x})} \cdot e^{-\varepsilon g/2} \leq \delta,$$

so  $z \in \text{SAFE}_{(\varepsilon, \delta', t)}$ . □

### 3.2.3 Typical Gaussian Data Are Far from Unsafe

With Lemma 3.8, we can show that  $\alpha_1$ -typical data sets are far from UNSAFE. We ask for an additional  $\frac{\log(1/\beta)}{\varepsilon}$  distance beyond the threshold to ensure that we pass the distance test with high probability.

**Lemma 3.9** (Typically Far from UNSAFE). *Assume that  $x$  is  $\alpha_1$ -typical for  $\alpha_1 \leq \frac{1}{10}$ . There exists a constant  $c$  such that, for any  $\beta, \delta, \varepsilon > 0$  with  $\varepsilon \leq 1$  and  $\delta \leq \frac{1}{2}$ , if  $n \geq c \left( \frac{d + \log(1/\beta\delta)}{\varepsilon} \right)$  then  $x$  is  $\frac{\log(1/2\beta\delta)}{\varepsilon}$ -far from  $\text{UNSAFE}_{(\varepsilon, \delta, n/4)}$ .*

*Proof.* We use Lemma 3.8, which asks for a  $g > 0$  such that  $\frac{\text{Vol}(\mathcal{Y}_{t-k-1,x})}{\text{Vol}(\mathcal{Y}_{t+k+g+1,x})} \cdot e^{-\varepsilon g/2} \leq \frac{\delta}{4e^\varepsilon}$  to imply that  $x$  is  $k$ -far from  $\text{UNSAFE}_{(\varepsilon, \delta, t)}$ . We take  $g = \frac{n}{8}$ , so  $t - k - 1 = n \left( \frac{1}{4} - \frac{k+1}{n} \right)$  and  $t + g + k + 1 = n \left( \frac{3}{8} + \frac{k+1}{n} \right)$ . We apply Lemma 3.6 to bound the ratio of volumes:

$$\frac{\text{Vol}(\mathcal{Y}_{t-k-1,x})}{\text{Vol}(\mathcal{Y}_{t+k+g+1,x})} \leq \left( \frac{\Phi^{-1} \left( \frac{3}{4} + \frac{k+1}{n} + \alpha_1 \right)}{\Phi^{-1} \left( \frac{5}{8} - \frac{k+1}{n} - \alpha_1 \right)} \right)^d. \quad (13)$$

We want both arguments to the quantile functions to be bounded away from  $1/2$  and  $1$ , for which it suffices to use our assumption of  $\alpha_1 \leq \frac{1}{10}$  and ask that  $\frac{k+1}{n} < \frac{1}{100}$ . This means that we must have  $n \geq (1/\varepsilon) \log(1/\beta\delta)$ .

With both quantiles equal to constants, there is a constant  $c'$  such that

$$\frac{\text{Vol}(\mathcal{Y}_{t-k-1,x})}{\text{Vol}(\mathcal{Y}_{t+k+g+1,x})} \cdot e^{-\varepsilon g/2} \leq e^{c'd - n\varepsilon/16}, \quad (14)$$

so we require  $n \geq c \left( \frac{d + \log(1/\delta)}{\varepsilon} \right)$  for some constant  $c$  to make (14) at most  $\frac{\delta}{4e^\varepsilon}$ , noting that  $e^\varepsilon \leq e$ . □

### 3.2.4 Restricted Exponential Mechanism is Accurate

For our final lemma in the accuracy analysis, we show that the restricted sampler  $\mathcal{M}_{\varepsilon,t}(x)$ , when run on  $\alpha_1$ -typical data sets, with high probability returns a point with high empirical Tukey depth.

**Lemma 3.10** (Accuracy of  $\mathcal{M}_{\varepsilon,t}(x)$ ). *Assume that  $x$  is  $\alpha_1$ -typical for  $\alpha_1 < \frac{1}{10}$ . For any  $\beta > 0$  and  $\alpha_2 \geq 2\alpha_1$ , we have, for some constant  $c$ ,*

$$\Pr_{y \sim \mathcal{M}_{n/4}(x)} \left[ T_x(y) < \frac{1}{2} - \alpha_2 \right] \leq \left( \frac{c}{\alpha_2 - 2\alpha_1} \right)^d e^{-\alpha_2 n \varepsilon / 4}. \quad (15)$$

*Proof.* Let BAD be the set of points with empirical Tukey depth below  $\frac{1}{2} - \alpha_2$ , and GOOD those with score above  $\frac{1}{2} - \frac{\alpha_2}{2}$ . Let  $y \sim \mathcal{M}_{n/4}(x)$ .

$$\Pr[y \in \text{BAD}] \leq \frac{\Pr[y \in \text{BAD}]}{\Pr[y \in \text{GOOD}]} \leq \frac{\text{Vol}(\text{BAD}) \exp\left\{\frac{n\varepsilon}{2} \left(\frac{1}{2} - \alpha_2\right)\right\}}{\text{Vol}(\text{GOOD}) \exp\left\{\frac{n\varepsilon}{2} \left(\frac{1}{2} - \frac{\alpha_2}{2}\right)\right\}} \leq \frac{\text{Vol}(\mathcal{Y}_{n/4,x})}{\text{Vol}(\mathcal{Y}_{n(\frac{1}{2} - \frac{\alpha_2}{2}),x})} \cdot e^{-\alpha_2 n \varepsilon / 4}. \quad (16)$$

By Lemma 3.6, the ratio of volumes is at most  $\left( \frac{\Phi^{-1}(3/4 + \alpha_1)}{\Phi^{-1}(\frac{1}{2} + \frac{\alpha_2}{2} - \alpha_1)} \right)^d$ . Since  $\alpha_1 \leq \frac{1}{10}$ ,  $\Phi^{-1}(3/4 + \alpha_1)$  is at most a constant.

As  $\alpha_2 - 2\alpha_1$  tends to 0, the denominator approaches 0 as well. To finish the proof, then, we show that, for any  $z > 0$ ,  $\Phi^{-1}(\frac{1}{2} + z) \geq \sqrt{2\pi}z$  or, equivalently,  $\frac{1}{2} + z \geq \Phi(\sqrt{2\pi}z)$ . Since  $e^{-x^2/2} \leq 1$ , we have

$$\Phi(\sqrt{2\pi}z) \leq \frac{1}{2} + \frac{1}{\sqrt{2\pi}} \int_0^{\sqrt{2\pi}z} 1 \, dx = \frac{1}{2} + z. \quad (17)$$

□

We are now ready to prove the main theorem.

*Proof of Theorem 3.2.* Set  $\alpha_1 = c_0\alpha$  for a constant  $c_0$  to be determined later, and set  $\alpha_2 = 3\alpha_1$ . By Lemma 3.5, with probability at least  $1 - \beta$ ,  $x$  is  $\alpha_1$ -typical. If  $x$  is  $\alpha_1$ -typical, by Lemma 3.9 it is at least  $\frac{\log(1/2\delta\beta)}{\varepsilon}$ -far from  $\text{UNSAFE}_{(\varepsilon,\delta,t)}$ . This implies that Algorithm 1 returns FAIL with probability at most  $2\beta$ : by the CDF of the Laplace distribution,

$$\Pr[\text{FAIL}] \leq \Pr[x \text{ not } \alpha_1\text{-typical}] + \Pr\left[\frac{\log(1/2\delta\beta)}{\varepsilon} + Z \leq \frac{\log(1/2\delta)}{\varepsilon}\right] \quad (18)$$

$$\leq \beta + \Pr\left[Z \leq -\frac{\log(1/\beta)}{\varepsilon}\right] = \beta + \frac{\beta}{2}. \quad (19)$$

If  $x$  is  $\alpha_1$ -typical and we don't return FAIL, we instead return a sample from  $\mathcal{M}_{n/4}(x)$ . Lemma 3.10 tells us that, for  $\alpha_1$ -typical  $x$ ,

$$\Pr_{y \sim \mathcal{M}_{n/4}(x)} \left[ T_x(y) < \frac{1}{2} - \alpha_2 \right] \leq \left( \frac{c}{\alpha_2 - 2\alpha_1} \right)^d e^{-\alpha_2 n \varepsilon / 4} \leq e^{d \log(c/\alpha_1) - \alpha_2 n \varepsilon / 4}, \quad (20)$$

using  $\alpha_2 = 3\alpha_1$ . Since  $n$  is sufficiently large, this is at most  $\beta$ .

So with probability at least  $1 - 3\beta$ , we have  $T_x(y) \geq \frac{1}{2} - \alpha_2$ . Since  $x$  is  $\alpha_1$ -typical, we have

$$T_P(y) \geq \frac{1}{2} - \alpha_1 - \alpha_2 = \frac{1}{2} - 4\alpha_1. \quad (21)$$

Recall  $\Phi(-\|y - \mu\|_\Sigma) = T_P(y)$ . By definition,  $\Phi(-z) = \frac{1}{2} - \frac{1}{2}\text{Erf}\left(\frac{z}{\sqrt{2}}\right)$ . It is easy to see that  $\text{Erf}(x) \geq \text{Erf}(1) \cdot x \geq 0.84x$  for  $x \in [0, 1]$  (see e.g. [16, Lemma 3.2]). It follows that

$$\Phi(-z) \leq \frac{1}{2} - \frac{0.84z}{2\sqrt{2}}.$$

Combining the above inequalities, we have that  $\|y - \mu\|_\Sigma \leq \frac{8\sqrt{2}}{0.84} \alpha_1 \leq 14\alpha_1$ . Setting  $c_0 = 1/14$  makes this term at most  $\alpha$ .

Privacy follows from a standard calculation, provided in Appendix D as Proposition D.1.  $\square$

## 4 Empirically Rescaled Gaussian Mechanism

In this section, we describe our second estimator. At a high level, the estimator first privately checks whether the data set  $x$  is  $\frac{1}{\epsilon}$ -close in Hamming distance to a good set of “roughly Gaussian” data sets  $\mathcal{G}(\lambda)$ . If so, it finds the closest data set to  $x$  that belongs in  $\mathcal{G}(\lambda)$ , which we call  $\tilde{x}$ . Then it returns a sample  $\hat{\mu}$  drawn from  $\mathcal{N}(\mu_{\tilde{x}}, C^2 \Sigma_{\tilde{x}})$ , where  $\mu_{\tilde{x}}$  and  $\Sigma_{\tilde{x}}$  are the empirical mean and covariance of  $\tilde{x}$  and  $C$  is a scale parameter appropriately set to ensure privacy.

Specifically, we define the empirical mean and covariance in the following (slightly non-standard) way:

**Definition 4.1** (Empirical Mean and Covariance). For data set  $x \in \mathbb{R}^{3n \times d}$ , the empirical mean and covariance of  $x$  are respectively defined by

$$\mu_x = \frac{1}{n} \sum_{i=1}^n x_{i+2n} \quad \text{and} \quad \Sigma_x = \frac{1}{2n} \sum_{i=1}^n (x_i - x_{i+n})(x_i - x_{i+n})^T.$$

In comparison with the standard empirical estimators, ours enable a simpler privacy analysis, since replacing one datapoint in  $x$  only affects one term in one of the sums. For convenience, we choose the number of samples to be  $3n$  so that we can pair the first two thirds to construct  $\Sigma_x$  and use the last third for  $\mu_x$ . Note that before accessing the data set, the algorithm randomly permutes all data points (line 3) – a technicality which pertains to the fact that  $\Sigma_x$  is order-dependent. With these definitions at hand, the good set  $\mathcal{G}(\lambda)$  is defined as follows:

**Definition 4.2** ( $\lambda$ -goodness). For any  $\lambda > 0$ , define  $\mathcal{G}(\lambda) \subseteq \mathbb{R}^{3n \times d}$  as

$$\mathcal{G}(\lambda) \stackrel{\text{def}}{=} \left\{ x \in \mathbb{R}^{3n \times d} : \Sigma_x \text{ is invertible and } \forall i \in [3n] \quad \|x_i - \mu_x\|_{\Sigma_x}^2 \leq \lambda \right\}.$$

We set  $\lambda \approx d \log n$ , since for this value (sub)Gaussian data will belong in  $\mathcal{G}(\lambda)$  with high probability.

Finally, we note that the algorithm immediately aborts if the number of samples is less than  $\frac{k\lambda \log(1/\delta)}{\epsilon} \approx \frac{d \log(1/\delta)}{\epsilon^2}$ , a condition necessary to ensure privacy. The parameter  $k \approx \frac{\log(1/\delta)}{\epsilon}$  is an upper bound on the Hamming distance between the projections  $\tilde{x}, \tilde{y}$  of any two neighboring data sets  $x, y$  that pass the check in line 5, and, along with  $\lambda$ , plays an important role in the privacy analysis.

---

**Algorithm 2** Empirically Rescaled Gaussian Mechanism  $\mathcal{A}_{\epsilon, \delta, \beta}^G(x)$

---

**Require:** Data set  $x = (x_1, \dots, x_{3n})^T \in \mathbb{R}^{3n \times d}$ . Privacy parameters  $\epsilon, \delta > 0$ . Failure probability  $\beta > 0$ .

- 1: Initialize:  $\lambda \leftarrow O\left(d \log \frac{n}{\beta}\right)$ ,  $t \leftarrow \frac{1}{\epsilon} \log \frac{1}{\beta}$ ,  $k \leftarrow \frac{2}{\epsilon} \log \frac{1}{\delta\beta} + 1$ ,  $C^2 \leftarrow \frac{32k^2}{\epsilon^2 n^2} \cdot \frac{\lambda}{1-2k\lambda/n} \cdot \log \frac{1.25}{\delta}$ .
  - 2: **if**  $n = o\left(\frac{k\lambda}{\epsilon} \log \frac{1}{\delta}\right)$  **then return FAIL**.
  - 3:  $\tilde{x} \leftarrow \sigma(x)$  ▷ random permutation  $\sigma : (\mathbb{R}^d)^{3n} \rightarrow (\mathbb{R}^d)^{3n}$
  - 4:  $h \leftarrow D_H(\tilde{x}, \mathcal{G}(\lambda))$  ▷ distance between  $\tilde{x}$  and  $\lambda$ -goodness
  - 5: **if**  $h + r > t$  for  $r \sim \text{Lap}(1/\epsilon)$  **then return FAIL**.
  - 6:  $\tilde{x} \leftarrow \arg \min_{z \in \mathcal{G}(\lambda)} D_H(\tilde{x}, z)$  ▷ projection to  $\lambda$ -goodness
  - 7: **return**  $\hat{\mu} \sim \mathcal{N}(\mu_{\tilde{x}}, C^2 \Sigma_{\tilde{x}})$
- 

We remark that the sample size check in line 2 and the setting of  $\lambda$  are not well-defined, as they are stated with asymptotic notation. Although it is possible to compute the constants for these steps, we exclude them in favor of a cleaner analysis.

For simplicity, in this section we focus on Gaussian data. For the more general discussion for subgaussian data sets, see Appendix B.

**Theorem 4.3** (Privacy and Accuracy of the Empirically Rescaled Gaussian Mechanism). *For any  $\varepsilon > 0$ ,  $0 < \delta < 1$ , Algorithm 2 is  $(3\varepsilon, e^\varepsilon(1 + e^\varepsilon)\delta)$ -differentially private. There exists an absolute constant  $C$  such that, for any  $0 < \alpha, \beta, \varepsilon, \delta < 1$ , mean  $\mu$ , and positive definite  $\Sigma$ , if  $x \sim \mathcal{N}(\mu, \Sigma)^{\otimes n}$  and*

$$n \geq C \left( \frac{d}{\alpha^2} \log \frac{1}{\beta} + \frac{d}{\alpha \varepsilon^2} \log^3 \frac{1}{\delta \beta} \cdot \log \frac{d \log(1/\delta \beta)}{\alpha \varepsilon} \right), \quad (22)$$

*then with probability at least  $1 - 3\beta$ , Algorithm 2 returns  $\mathcal{A}_{\varepsilon, \delta, \beta}^G(x) = \hat{\mu}$  such that  $\|\hat{\mu} - \mu\|_\Sigma \leq \alpha$ .*

The proof of Theorem 4.3 follows by a combination of the accuracy and privacy guarantees of the algorithm, stated in Theorem 4.9 and Corollary 4.14 which we prove in the next two sections.

## 4.1 Accuracy Analysis

The crux of the proof of the sample complexity guarantee (Theorem 4.9) is the following. Suppose  $n$  is large enough so that the algorithm does not fail in line 2.

- If  $x \sim \mathcal{N}(\mu, \Sigma)^{\otimes 3n}$  and the number of samples is  $n = O(d + \log(1/\beta))$ , then with probability  $1 - \beta$  over the draw of  $x$ , the data set  $x$  is in the good set  $\mathcal{G}(\lambda)$  for  $\lambda = \tilde{O}(d)$  (Lemma 4.7). In particular, this holds for the permuted data set  $\bar{x}$  as this is also drawn from  $\mathcal{N}(\mu, \Sigma)^{\otimes 3n}$ .
- This implies that with high probability over the randomness of the algorithm,  $\bar{x}$  passes the Hamming distance check in line 5 and the projection of line 6 leaves it intact so that  $\tilde{x} = \bar{x}$ .
- It then suffices to prove that, with high probability, the returned estimator  $\hat{\mu} \sim \mathcal{N}(\mu_{\tilde{x}}, C^2 \Sigma_{\tilde{x}})$  is a good approximation of the true mean  $\mu$  measured by the Mahalanobis distance with respect to the true  $\Sigma$ , that is,  $\|\hat{\mu} - \mu\|_\Sigma = \tilde{O}(\sqrt{d/n} + d/\varepsilon^2 n)$  (Lemma 4.8).

For a short review of basic linear algebra facts, see Appendix A. We start by presenting a few known facts we will use in this subsection. First, we prove the following proposition, which states that if two matrices  $\Sigma_1, \Sigma_2$  are good spectral approximations of one another, then the Mahalanobis distance of any vector with respect to  $\Sigma_1$  is close to the one with respect to  $\Sigma_2$  and vice versa.

**Proposition 4.4.** *For positive definite matrices  $\Sigma_1, \Sigma_2$ , if there exists a constant  $\gamma \in (0, 1)$  such that*

$$(1 - \gamma)\Sigma_1 \leq \Sigma_2 \leq (1 + \gamma)\Sigma_1,$$

*then for any vector  $v$  we have*

$$\frac{1}{\sqrt{1 + \gamma}} \|v\|_{\Sigma_1} \leq \|v\|_{\Sigma_2} \leq \frac{1}{\sqrt{1 - \gamma}} \|v\|_{\Sigma_1}.$$

*Proof.* We upper bound  $\|v\|_{\Sigma_2}$ ; the lower bound is analogous. Since the matrices are invertible, we have  $\Sigma_1^{-1} \geq (1 - \gamma)\Sigma_2^{-1}$ , i.e.  $\Sigma_1^{-1} - (1 - \gamma)\Sigma_2^{-1}$  is psd. So we have

$$\begin{aligned} (1 - \gamma)\|v\|_{\Sigma_2}^2 &= (1 - \gamma)\|v\|_{\Sigma_2}^2 - \|v\|_{\Sigma_1}^2 + \|v\|_{\Sigma_1}^2 \\ &= v^T ((1 - \gamma)\Sigma_2^{-1} - \Sigma_1^{-1})v + \|v\|_{\Sigma_1}^2 \\ &= \|v\|_{\Sigma_1}^2 - v^T (\Sigma_1^{-1} - (1 - \gamma)\Sigma_2^{-1})v \\ &\leq \|v\|_{\Sigma_1}^2, \end{aligned}$$

applying the fact that  $v^T A v \geq 0$  for psd matrices.  $\square$

We will also make use of the following standard concentration inequalities for Gaussian random variables. For a reference, see [22]. The formulation used here is from [50, Fact 3.4].

**Lemma 4.5.** Let  $u_i \sim \mathcal{N}(0, \mathbb{I})$  be i.i.d. samples for  $i \in [n]$ . Define the estimator  $\hat{\Sigma} = \frac{1}{n} \sum_{i=1}^n u_i u_i^T$ . For every  $\beta > 0$ , with probability at least  $1 - \beta$  the following conditions both hold:

$$\left(1 - O\left(\sqrt{\frac{d + \log(1/\beta)}{n}}\right)\right) \cdot \mathbb{I} \leq \hat{\Sigma} \leq \left(1 + O\left(\sqrt{\frac{d + \log(1/\beta)}{n}}\right)\right) \cdot \mathbb{I} \quad (23)$$

$$\forall i \in [n] \quad \|u_i\|_2^2 \leq O(d \log(n/\beta)) \quad (24)$$

The following generalization to non-spherical Gaussians is a straightforward implication.

**Lemma 4.6.** Suppose  $u_1, \dots, u_n$  satisfy inequalities (23) and (24). Let  $\Sigma > 0$  and let  $\lambda_1$  be the largest eigenvalue of  $\Sigma$ . Let  $z_i = \Sigma^{1/2} u_i$  for all  $i \in [n]$  and define  $\hat{\Sigma}_z = \frac{1}{n} \sum_{i=1}^n z_i z_i^T$ . Then the following conditions both hold:

$$\left(1 - O\left(\sqrt{\frac{d + \log(1/\beta)}{n}}\right)\right) \cdot \Sigma \leq \hat{\Sigma}_z \leq \left(1 + O\left(\sqrt{\frac{d + \log(1/\beta)}{n}}\right)\right) \cdot \Sigma$$

$$\forall i \in [n] \quad \|z_i\|_2^2 \leq O(\lambda_1 d \log(n/\beta))$$

We now begin the accuracy analysis.

In the next Lemma 4.7 we prove that if  $n \gtrsim d$  then Gaussian data sets fall into the good set  $\mathcal{G}(\lambda)$  with high probability. Intuitively, this holds since Gaussian data are already likely to satisfy the condition  $\|x_i - \mu\|_\Sigma \leq \lambda$ , which by design is the same as the condition on the good set, except that the true parameters are replaced by the empirical ones. The assumption  $n \gtrsim d$  ensures that the empirical and true parameters are close.

**Lemma 4.7.** Let  $x \sim \mathcal{N}(\mu, \Sigma)^{\otimes 3n}$  and  $n = \Omega(d + \log(1/\beta))$ . There exists a  $\lambda = O(d \log(n/\beta))$  such that, with probability at least  $1 - \beta$  we have  $x \in \mathcal{G}(\lambda)$ .

*Proof.* Since Mahalanobis distance is invariant to both changes in mean and full-rank transformations, it suffices to prove this claim for  $x \sim \mathcal{N}(0, \mathbb{I})^{\otimes 3n}$ .

Taking  $n = \Omega(d + \log(1/\beta))$ , we have that there exists a constant  $\gamma \in (0, 1)$  so that  $O\left(\sqrt{\frac{d + \log(1/\beta)}{n}}\right)$  is less than  $\gamma$ . By Lemma 4.5 with probability  $1 - \beta$ ,

$$(1 - \gamma) \cdot \mathbb{I} \leq \Sigma_x \leq (1 + \gamma) \cdot \mathbb{I} \quad (25)$$

and

$$\forall i \in [3n] \quad \|x_i - \mu\|_2 \leq O(\sqrt{d \log(n/\beta)}). \quad (26)$$

These equations and Proposition 4.4 imply that  $\Sigma_x$  is invertible and that for all  $i$ ,  $\|x_i - \mu\|_{\Sigma_x} = O(\sqrt{d \log(n/\beta)})$ . Furthermore, Equation (26) implies  $\|\mu_x - \mu\|_{\Sigma_x} \leq \frac{1}{n} \sum_{i=1}^n \|x_{i+2n} - \mu\|_{\Sigma_x} = O(\sqrt{d \log(n/\beta)})$  by the triangle inequality. We finish the proof by applying the triangle inequality one more time:  $\|x_i - \mu_x\|_{\Sigma_x} \leq \|x_i - \mu\|_{\Sigma_x} + \|\mu - \mu_x\|_{\Sigma_x} = O(\sqrt{d \log(n/\beta)})$ .  $\square$

The next lemma bounds the error  $\|\hat{\mu} - \mu\|_\Sigma$  for  $\hat{\mu} \sim \mathcal{N}(\mu_x, C^2 \Sigma_x)$ , where  $x \sim \mathcal{N}(\mu, \Sigma)^{\otimes 3n}$ . It follows directly from Gaussian concentration. The condition on the number of samples serves two purposes. First,  $n = \Omega(d + \log(1/\beta))$  is required so that the empirical covariance  $\Sigma_x$  is a good spectral approximation of the true covariance  $\Sigma$ , as before. Second,  $n = \Omega(k\lambda)$  is required so that the parameter  $C^2$  is well-defined. Recalling the setting of parameters  $k = O(\log(1/\delta\beta)/\epsilon)$  and  $\lambda = O(d \log(n/\beta))$ , both these conditions are satisfied as long as  $n = \tilde{O}(d/\epsilon)$ .

**Lemma 4.8.** Suppose  $x \sim \mathcal{N}(\mu, \Sigma)^{\otimes 3n}$  and  $n = \Omega(\max\{(d + \log(1/\beta)), k\lambda\})$ , where parameters  $k, \lambda$  are set as in Algorithm 2. Then with probability at least  $1 - \beta$ , for  $\hat{\mu} \sim \mathcal{N}(\mu_x, C^2 \Sigma_x)$ ,

$$\|\hat{\mu} - \mu\|_\Sigma = O\left(\sqrt{\frac{d}{n} \cdot \log \frac{1}{\beta}} + \frac{d}{\epsilon^2 n} \log^2 \frac{1}{\delta\beta} \cdot \sqrt{\log \frac{n}{\beta}}\right).$$

*Proof.* By triangle inequality, we have that

$$\|\hat{\mu} - \mu\|_{\Sigma} \leq \|\mu - \mu_x\|_{\Sigma} + \|\mu_x - \hat{\mu}\|_{\Sigma}.$$

We focus on the first term  $\|\mu - \mu_x\|_{\Sigma} = \|\frac{1}{n} \sum_{i=1}^n \Sigma^{-1/2}(x_{i+2n} - \mu)\|_2 = \|\frac{1}{n} \sum_{j=1}^n u_i\|_2$ , where  $u_i \sim \mathcal{N}(0, \mathbb{I})$  for all  $i \in [n]$ . Since  $\frac{1}{n} \sum_{j=1}^n u_i \sim \mathcal{N}(0, \frac{1}{n} \mathbb{I})$ , we can write  $\|\frac{1}{n} \sum_{j=1}^n u_i\|_2 = \frac{1}{\sqrt{n}} \|u'\|_2$  for  $u' \sim \mathcal{N}(0, \mathbb{I})$ . By Lemma 4.5, we have that  $\|u'\|_2^2 = O(d \log(1/\beta))$  with probability at least  $1 - \beta/2$ . So with probability at least  $1 - \beta/2$ , it holds that

$$\|\mu - \mu_x\|_{\Sigma} = O\left(\sqrt{\frac{d}{n} \cdot \log \frac{1}{\beta}}\right). \quad (27)$$

We now give an upper bound for the second term. Notice that if we let  $z_i = (x_i - x_{i+n})/\sqrt{2}$ , then for all  $i \in [n]$   $z_i$  are i.i.d. samples from  $\mathcal{N}(0, \Sigma)$  and  $\Sigma_x = \frac{1}{n} \sum_{i=1}^n z_i z_i^T$ . Taking  $n = \Omega(d + \log(1/\beta))$ , so that  $O\left(\sqrt{\frac{d + \log(1/\beta)}{n}}\right)$  is a sufficiently small constant  $\gamma$ , by Lemma 4.6 with probability  $1 - \beta/4$  we have  $(1 - \gamma) \cdot \Sigma \leq \Sigma_x \leq (1 + \gamma) \cdot \Sigma$ .

It follows that, by Proposition 4.4,  $\|\hat{\mu} - \mu_x\|_{\Sigma} = O(\|\hat{\mu} - \mu_x\|_{\Sigma_x})$ . So it suffices to bound  $\|\hat{\mu} - \mu_x\|_{\Sigma_x} = \|C^{-1} \Sigma_x^{-1/2}(\hat{\mu} - \mu_x)\|_2 \cdot C$ .

Since  $\hat{\mu} \sim \mathcal{N}(\mu_x, C^2 \Sigma_x)$ , equivalently, we have that  $u = C^{-1} \Sigma_x^{-1/2}(\hat{\mu} - \mu_x) \sim \mathcal{N}(0, \mathbb{I})$ . By Lemma 4.5, we have that with probability at least  $1 - \beta/4$ ,  $\|u\|_2^2 = O(d \log(1/\beta))$ . Therefore, by union bound, with probability at least  $1 - \beta/2$ ,

$$\|\hat{\mu} - \mu_x\|_{\Sigma} = O\left(C \sqrt{d \log \frac{1}{\beta}}\right). \quad (28)$$

Combining Equation (27) and (28), by union bound, with probability at least  $1 - \beta$ , it holds that

$$\begin{aligned} \|\hat{\mu} - \mu\|_{\Sigma} &= O\left(\sqrt{\frac{d}{n} \cdot \log \frac{1}{\beta}} + C \sqrt{d \log \frac{1}{\beta}}\right) \\ &= O\left(\sqrt{\frac{d}{n} \cdot \log \frac{1}{\beta}} + \frac{k}{\varepsilon n} \sqrt{\frac{\lambda}{1 - 2k\lambda/n} \log \frac{1.25}{\delta}} \sqrt{d \log \frac{1}{\beta}}\right) \quad (\text{substituting } C) \\ &= O\left(\sqrt{\frac{d}{n} \cdot \log \frac{1}{\beta}} + \frac{k}{\varepsilon n} \sqrt{d \lambda \log \frac{1}{\delta} \cdot \log \frac{1}{\beta}}\right) \quad (\text{since } n = \Omega(k\lambda)) \\ &= O\left(\sqrt{\frac{d}{n} \cdot \log \frac{1}{\beta}} + \frac{kd}{\varepsilon n} \sqrt{\log \frac{1}{\delta} \cdot \log \frac{1}{\beta} \cdot \log \frac{n}{\beta}}\right) \quad (\text{substituting } \lambda) \\ &= O\left(\sqrt{\frac{d}{n} \cdot \log \frac{1}{\beta}} + \frac{d}{\varepsilon^2 n} \left(\log \frac{1}{\delta} + \log \frac{1}{\beta}\right) \sqrt{\log \frac{1}{\delta} \cdot \log \frac{1}{\beta} \cdot \log \frac{n}{\beta}}\right) \quad (\text{substituting } k) \\ &= O\left(\sqrt{\frac{d}{n} \cdot \log \frac{1}{\beta}} + \frac{d}{\varepsilon^2 n} \log^2 \frac{1}{\delta \beta} \cdot \sqrt{\log \frac{n}{\beta}}\right). \end{aligned}$$

This completes the proof of the lemma.  $\square$

We are now ready to state the sample complexity of Algorithm 2, putting together the lemmas above.

**Theorem 4.9** (Accuracy of  $\mathcal{A}_{\varepsilon, \delta, \beta}^G(x)$ ). *There exists an absolute constant  $C$  such that, for any  $0 < \alpha, \beta, \varepsilon, \delta < 1$ , mean  $\mu$ , and positive definite  $\Sigma$ , if  $x \sim \mathcal{N}(\mu, \Sigma)^{\otimes 3n}$  and*

$$n \geq C \left( \frac{d}{\alpha^2} \log \frac{1}{\beta} + \frac{d}{\alpha \varepsilon^2} \log^3 \frac{1}{\delta \beta} \cdot \log \frac{d \log(1/\delta \beta)}{\alpha \varepsilon} \right), \quad (29)$$

then with probability  $1 - 3\beta$ , Algorithm 2 returns  $\mathcal{A}_{\varepsilon, \delta, \beta}^G(x) = \hat{\mu}$  such that  $\|\hat{\mu} - \mu\|_{\Sigma} \leq \alpha$ .

*Proof.* First, we argue that for this sample complexity, the algorithm does not return FAIL in line 2. Recall that the condition is

$$n = \Omega\left(\frac{k\lambda}{\varepsilon} \log \frac{1}{\delta}\right). \quad (30)$$

Substituting the terms  $k = \frac{2}{\varepsilon} \log \frac{1}{\delta\beta} + 1$  and  $\lambda = O(d \log(n/\beta))$  in condition (30), we have that

$$\frac{k\lambda}{\varepsilon} \log \frac{1}{\delta} = O\left(\frac{d}{\varepsilon^2} \log \frac{1}{\delta\beta} \cdot \log \frac{n}{\beta} \cdot \log \frac{1}{\delta}\right) = O\left(\frac{d}{\varepsilon^2} \log^3 \frac{1}{\delta\beta} \cdot \log n\right).$$

For some absolute constant  $C$ , we let

$$n \geq C\left(\frac{d}{\alpha^2} \log \frac{1}{\beta} + \frac{d}{\alpha\varepsilon^2} \log^3 \frac{1}{\delta\beta} \cdot \log \frac{d \log(1/\delta\beta)}{\alpha\varepsilon}\right). \quad (31)$$

By straightforward calculations and since  $\alpha \leq 1$ , we can see that the sample size of Eq. (31) above suffices for  $n$  to satisfy condition (30), and so Algorithm 2 does not fail in line 2.

Since  $\bar{x}$  is a permutation of  $x$ , it holds that  $\bar{x} \sim \mathcal{N}(\mu, \Sigma)^{\otimes 3n}$  as well. Note that the number of samples in Eq. (31) satisfies  $n = \Omega(d + \log(1/\beta))$ . This implies that the assumptions of Lemma 4.7 are satisfied and thus it holds that, with probability  $1 - \beta$ ,  $\bar{x} \in \mathcal{G}(\lambda)$ .

It follows that the Hamming distance of  $\bar{x}$  from the good set in line 4 is  $h = 0$ . Since  $r \sim \text{Lap}(1/\varepsilon)$ , by concentration of the Laplace distribution, it holds that  $|r| \leq \frac{1}{\varepsilon} \log \frac{1}{\beta}$  with probability  $1 - \beta$ . Thus, by union bound, with probability  $1 - 2\beta$ ,  $h + r \leq \frac{1}{\varepsilon} \log \frac{1}{\beta}$ . It follows that, with probability  $1 - 2\beta$ , we do not fail in line 5 and we reach line 6, where the projection step leaves the data set unchanged, that is,  $\tilde{x} = \bar{x}$ , since  $\bar{x} \in \mathcal{G}(\lambda)$ .

So far, we have proven that with probability  $1 - 2\beta$ , Algorithm 2 does not fail in any step and returns  $\hat{\mu} \sim \mathcal{N}(\mu_{\tilde{x}}, C^2 \Sigma_{\tilde{x}})$  in line 7, where  $\tilde{x} \sim \mathcal{N}(\mu, \Sigma)^{\otimes 3n}$ . Now, notice that the sample complexity stated in Eq. (31) satisfies the condition  $n = \Omega(\max\{d + \log(1/\beta), k\lambda\})$  as well. Since  $\tilde{x} \sim \mathcal{N}(\mu, \Sigma)^{\otimes 3n}$ , the assumptions of Lemma 4.8 are satisfied and therefore, by union bound, with probability at least  $1 - 3\beta$ , Algorithm 2 returns  $\hat{\mu}$  such that

$$\|\hat{\mu} - \mu\|_{\Sigma} = O\left(\sqrt{\frac{d}{n} \cdot \log \frac{1}{\beta}} + \frac{d}{\varepsilon^2 n} \log^2 \frac{1}{\delta\beta} \cdot \sqrt{\log \frac{n}{\beta}}\right). \quad (32)$$

The proof is complete by observing that for the stated sample complexity and the right choice of constant  $C$  in Eq. (31), the error in Eq. (32) is upper bounded so that  $\|\hat{\mu} - \mu\|_{\Sigma} \leq \alpha$ .  $\square$

## 4.2 Privacy Analysis

We state the privacy guarantee of our algorithm in Corollary 4.14. We consider two neighboring data sets  $x, y$  and that they are “aligned,” i.e. their Hamming distance is minimized and  $D_H(x, y) \leq 1$ . We show that due to the permutation step in line 3, it suffices to prove the privacy guarantee for this case (Lemma D.6).

The private check in line 5 of the algorithm ensures that for two data sets with Hamming distance 1, the probabilities of failing under  $x, y$  are indistinguishable. If  $x, y$  are far from the good set, then they both fail with high probability. On the other hand, if  $x, y$  are close to the good set, then their projections  $\tilde{x}, \tilde{y}$  are close to each other, i.e.  $D_H(\tilde{x}, \tilde{y}) \leq k$ . In particular, this implies that the estimators  $\Sigma_{\tilde{x}}, \Sigma_{\tilde{y}}$  are “close” (in a sense established in Section 4.2.1) since they differ in at most  $k$  terms and each term is bounded (because  $\tilde{x}, \tilde{y} \in \mathcal{G}(\lambda)$ ).

Our main result is Theorem 4.13, which states that any two nearby and good data sets  $\tilde{x}, \tilde{y}$  have empirical estimators that induce indistinguishable output distributions  $\mathcal{N}(\mu_{\tilde{x}}, C^2 \Sigma_{\tilde{x}})$  and  $\mathcal{N}(\mu_{\tilde{y}}, C^2 \Sigma_{\tilde{y}})$ . The proof is broken into two parts:

1. First, we “change the mean” and show that  $\mathcal{N}(\mu_{\tilde{x}}, C^2 \Sigma_{\tilde{x}}) \approx_{\varepsilon, \delta} \mathcal{N}(\mu_{\tilde{y}}, C^2 \Sigma_{\tilde{x}})$ , which is equivalent to  $\mathcal{N}(\Sigma_{\tilde{x}}^{-1/2}(\mu_{\tilde{x}} - \mu_{\tilde{y}}), C^2 \mathbb{I}) \approx_{\varepsilon, \delta} \mathcal{N}(0, C^2 \mathbb{I})$  (Lemma 4.19). This follows by an application of the Gaussian mechanism for the right choice of parameter  $C$ .

2. Second, we “change the covariance” and show that  $\mathcal{N}(\mu_{\tilde{y}}, C^2 \Sigma_{\tilde{x}}) \approx_{\varepsilon_1, \delta} \mathcal{N}(\mu_{\tilde{y}}, C^2 \Sigma_{\tilde{y}})$ , for  $\varepsilon_1 = O\left(\frac{k\lambda}{n-k\lambda} \log \frac{1}{\delta}\right)$ , which is equivalent to  $\mathcal{N}(0, \Sigma_{\tilde{x}}) \approx_{\varepsilon_1, \delta} \mathcal{N}(0, \Sigma_{\tilde{y}})$  (Lemma 4.15). Notice that if we want  $\varepsilon_1 \leq \varepsilon$ , then it has to be the case that  $n = \Omega\left(\frac{k\lambda}{\varepsilon} \log \frac{1}{\delta}\right) = \Omega\left(\frac{d}{\varepsilon^2} \cdot \text{polylog}\left(\frac{d \log(1/\beta\delta)}{\varepsilon}\right)\right)$ , which is the condition in line 2 of Algorithm 2.

#### 4.2.1 Implications of Goodness

Before directly addressing privacy, we state a few lemmas that follow from the goodness assumption. The proofs, provided in Appendix D, require only elementary linear algebra.

**Lemma 4.10.** *If  $x \in \mathcal{G}(\lambda)$ , then for any indices  $i, j \in [3n]$  we have*

$$(x_i - x_j)^T \Sigma_x^{-1} (x_i - x_j) \leq 4\lambda.$$

*In particular, this applies to  $u_i^T \Sigma_x^{-1} u_i$  for all  $i \in [n]$ , where  $u_i = x_i - x_{i+n}$ .*

**Lemma 4.11.** *Suppose  $x, y \in \mathcal{G}(\lambda)$  and  $D_H(x, y) \leq k$ , with  $2k\lambda < n$ . For any vector  $v$  we have*

$$v^T \Sigma_y^{-1} v \leq \frac{1}{1 - 2k\lambda/n} \cdot v^T \Sigma_x^{-1} v.$$

**Lemma 4.12.** *Suppose  $x, y \in \mathcal{G}(\lambda)$  and  $D_H(x, y) \leq k$ , with  $2k\lambda < n$ . Then*

$$\begin{aligned} \|\Sigma_x^{-1/2} \Sigma_y \Sigma_x^{-1/2} - \mathbb{I}\|_{\text{tr}} &\leq 2k\lambda \left( \frac{1}{n - 2k\lambda} + \frac{1}{n} \right) \\ \|\Sigma_y^{-1/2} \Sigma_x \Sigma_y^{-1/2} - \mathbb{I}\|_{\text{tr}} &\leq 2k\lambda \left( \frac{1}{n - 2k\lambda} + \frac{1}{n} \right) \end{aligned}$$

#### 4.2.2 Proof of Differential Privacy

We are now ready to prove the privacy guarantees of Algorithm 2. Unlike the standard empirical estimators, our definition of  $\Sigma_x$  is not invariant with respect to reordering the data. As a result, the covariance  $\Sigma_y$  of an adjacent data set  $y$  could differ in an arbitrary number of terms. To simplify our analysis, we establish indistinguishability for adjacent data sets that are “aligned,” i.e., they have Hamming distance 1. Because of the data-order permutation step in Algorithm 2, we can extend this to apply more generally to adjacent data sets (interpreted as multisets) which differ in a single data point, as required by the standard definition of differential privacy (see Proposition D.6 in Appendix D).

The main result, Theorem 4.13, is that any two nearby, good data sets have empirical estimators that induce indistinguishable output distributions. With this in hand, overall privacy of Algorithm 2 follows from a standard calculation, included in Appendix D.2.

**Theorem 4.13.** *For any  $\varepsilon, \delta, \lambda, k, n > 0$  such that*

$$n > 2k\lambda \quad \text{and} \quad \varepsilon \geq 10k\lambda \left( \frac{1}{n - 2k\lambda} + \frac{1}{n} \right) \log \frac{2}{\delta},$$

*set*

$$C^2 = \frac{32k^2}{\varepsilon^2 n^2} \cdot \frac{\lambda}{1 - 2k\lambda/n} \cdot \log \frac{1.25}{\delta}.$$

*For any data sets  $x, y \in \mathcal{G}(\lambda)$  of size  $3n$  such that  $D_H(x, y) \leq k$ , we have  $\mathcal{N}(\mu_x, C^2 \Sigma_x) \approx_{2\varepsilon, (1+e^\varepsilon)\delta} \mathcal{N}(\mu_y, C^2 \Sigma_y)$ .*

**Corollary 4.14** (Privacy of  $\mathcal{A}_{\varepsilon, \delta, \beta}^G(x)$ ). *Algorithm 2 is  $(3\varepsilon, e^\varepsilon(1 + e^\varepsilon)\delta)$ -differentially private.*

Theorem 4.13 follows from the triangle inequality for indistinguishability<sup>5</sup> and Lemmas 4.15 and 4.19: the first establishes  $\mathcal{N}(\mu_y, C^2 \Sigma_y) \approx \mathcal{N}(\mu_y, C^2 \Sigma_x)$  and the second gives us  $\mathcal{N}(\mu_y, C^2 \Sigma_x) \approx \mathcal{N}(\mu_x, C^2 \Sigma_x)$ .

**Lemma 4.15.** Suppose  $x, y \in \mathcal{G}(\lambda)$  and  $D_H(x, y) \leq k$ . For any  $\delta \in (0, 1)$ , if  $2k\lambda < n$  and

$$\varepsilon \geq 10k\lambda \left( \frac{1}{n - 2k\lambda} + \frac{1}{n} \right) \log \frac{2}{\delta},$$

then  $\mathcal{N}(0, \Sigma_x) \approx_{\varepsilon, \delta} \mathcal{N}(0, \Sigma_y)$ .

Note that this implies indistinguishability for any bijection of these two distributions. In particular, we have  $\mathcal{N}(\mu_y, C^2 \Sigma_y) \approx_{\varepsilon, \delta} \mathcal{N}(\mu_y, C^2 \Sigma_x)$ . For this proof, we use the Hanson-Wright Inequality, stated in the next lemma (see [56] for this formulation).

**Lemma 4.16** (Hanson-Wright Inequality). Let  $u \sim \mathcal{N}(0, \mathbb{I})$  and  $D \in \mathbb{R}^{d \times d}$ . Then, with probability  $1 - \beta$ ,

$$\text{tr}(D) - 2\|D\|_F \sqrt{\log \frac{2}{\beta}} \leq u^T D u \leq \text{tr}(D) + 2\|D\|_F \sqrt{\log \frac{2}{\beta}} + 2\|D\|_2 \log \frac{2}{\beta}.$$

*Proof of Lemma 4.15.* The privacy loss function is

$$\begin{aligned} f(w) &= \left| \log \frac{\Pr_{W \sim \mathcal{N}(0, \Sigma_x)}[W = w]}{\Pr_{W \sim \mathcal{N}(0, \Sigma_y)}[W = w]} \right| \\ &= \left| \log \left( \frac{|\Sigma_y|^{1/2}}{|\Sigma_x|^{1/2}} \exp \left\{ -\frac{1}{2} w^T \Sigma_x^{-1} w + \frac{1}{2} w^T \Sigma_y^{-1} w \right\} \right) \right| \\ &\leq \frac{1}{2} \left| w^T (\Sigma_y^{-1} - \Sigma_x^{-1}) w \right| + \frac{1}{2} \left| \log \frac{|\Sigma_y|}{|\Sigma_x|} \right|. \end{aligned} \quad (33)$$

It suffices to prove that  $\Pr_{w \sim \mathcal{N}(0, \Sigma_x)}[f(w) > \varepsilon] \leq \delta$  and  $\Pr_{w \sim \mathcal{N}(0, \Sigma_y)}[f(w) > \varepsilon] \leq \delta$ .

By Lemma 4.12, setting  $\rho = 2k\lambda \left( \frac{1}{n-2k\lambda} + \frac{1}{n} \right)$ , we have:

$$\begin{aligned} \|\Sigma_x^{-1/2} \Sigma_y \Sigma_x^{-1/2} - \mathbb{I}\|_{\text{tr}} &\leq \rho \\ \|\Sigma_y^{-1/2} \Sigma_x \Sigma_y^{-1/2} - \mathbb{I}\|_{\text{tr}} &\leq \rho \end{aligned}$$

Now we will use the following facts, whose proofs follow by standard properties of the trace and are omitted.

**Fact 4.17.** Let  $A, B$  be two symmetric positive definite matrices. Then the following equalities hold.

$$\begin{aligned} \text{tr}(A^{-1/2} B A^{-1/2} - \mathbb{I}) &= \text{tr}(B^{1/2} A^{-1} B^{1/2} - \mathbb{I}) \quad \text{and} \\ \|A^{-1/2} B A^{-1/2} - \mathbb{I}\|_F &= \|B^{1/2} A^{-1} B^{1/2} - \mathbb{I}\|_F. \end{aligned}$$

**Fact 4.18.** Let  $|C|$  denote the determinant of a matrix  $C$ . Then  $\text{tr}(\mathbb{I} - C^{-1}) \leq \log |C| \leq \text{tr}(C - \mathbb{I})$ .

By Fact 4.17 and since  $\max\{|\text{tr}(C)|, \|C\|_F\} \leq \|C\|_{\text{tr}}$  for any matrix  $C$ , this implies that

$$\max \left\{ \left| \text{tr}(\Sigma_y^{1/2} \Sigma_x^{-1} \Sigma_y^{1/2} - \mathbb{I}) \right|, \left\| \Sigma_y^{1/2} \Sigma_x^{-1} \Sigma_y^{1/2} - \mathbb{I} \right\|_F \right\} \leq \rho \quad (34)$$

$$\max \left\{ \left| \text{tr}(\Sigma_x^{1/2} \Sigma_y^{-1} \Sigma_x^{1/2} - \mathbb{I}) \right|, \left\| \Sigma_x^{1/2} \Sigma_y^{-1} \Sigma_x^{1/2} - \mathbb{I} \right\|_F \right\} \leq \rho \quad (35)$$

<sup>5</sup>For three distributions  $P_1, P_2, P_3$ , the definition of  $(\varepsilon, \delta)$ -indistinguishability tells us that if  $P_1 \approx_{\varepsilon, \delta} P_2$  and  $P_2 \approx_{\varepsilon, \delta} P_3$  then  $P_1 \approx_{2\varepsilon, (1+e^\varepsilon)\delta} P_3$ .

In addition, we observe that by applying Fact 4.18 once for  $C = \Sigma_x^{-1}\Sigma_y$  and once for  $C = \Sigma_y^{-1}\Sigma_x$  and using again the cyclic property of the trace, we can also bound the second term of Eq. (33) as

$$\left| \log \frac{|\Sigma_y|}{|\Sigma_x|} \right| \leq \rho. \quad (36)$$

We need a tail bound on  $\left| w^T (\Sigma_y^{-1} - \Sigma_x^{-1}) w \right|$  under both distributions. Take  $w \sim \mathcal{N}(0, \Sigma_x)$  or, alternatively,  $u \sim \mathcal{N}(0, \mathbb{I})$  and  $w = \Sigma_x^{1/2} u$ . Using this, we have

$$\begin{aligned} \left| w^T (\Sigma_y^{-1} - \Sigma_x^{-1}) w \right| &= \left| (\Sigma_x^{1/2} u)^T (\Sigma_y^{-1} - \Sigma_x^{-1}) (\Sigma_x^{1/2} u) \right| \\ &= \left| u^T (\Sigma_x^{1/2} \Sigma_y^{-1} \Sigma_x^{1/2} - \mathbb{I}) u \right| \\ &= |u^T D u|, \end{aligned} \quad (37)$$

defining  $D$  as the “difference matrix.”

Using the Hanson-Wright Inequality (Lemma 4.16), with probability at least  $1 - \delta$ ,

$$|u^T D u| \leq |\text{tr}(D)| + 2\|D\|_F \sqrt{\log(2/\delta)} + 2\|D\|_2 \log(2/\delta).$$

It holds that  $\|D\|_F \geq \|D\|_2$  for any matrix. So, with probability at least  $1 - \delta$ ,

$$|u^T D u| \leq 5 \log(2/\delta) \max\{|\text{tr}(D)|, \|D\|_F\} \leq 5 \log(2/\delta) \rho \quad (38)$$

where the latter holds by Eq. (34).

Combining Eq. (37), (38), and (36) in Eq. (33), with probability at least  $1 - \delta$  under  $w \sim \mathcal{N}(0, \Sigma_x)$ ,

$$f(w) \leq \frac{5}{2} \rho \log \frac{2}{\delta} + \frac{1}{2} \rho \leq 5 \rho \log \frac{2}{\delta} = 10k\lambda \left( \frac{1}{n-2k\lambda} - \frac{1}{n} \right) \log \frac{2}{\delta} \leq \varepsilon.$$

Similarly, we bound the first term of Eq. (33) for  $w \sim \mathcal{N}(0, \Sigma_y)$  using the same argument, where the “difference matrix” is now  $D' = \Sigma_y^{1/2} \Sigma_x^{-1} \Sigma_y^{1/2} - \mathbb{I}$ .  $\square$

Our second lemma, about the indistinguishability of Gaussians with the same covariance and different means, follows from the analysis of the standard Gaussian mechanism and the application of our goodness assumption.

**Lemma 4.19.** *Suppose  $x, y \in \mathcal{G}(\lambda)$  and  $D_H(x, y) \leq k$ , with  $2k\lambda < n$ . Set scaling parameter*

$$C^2 = \frac{32k^2}{\varepsilon^2 n^2} \cdot \frac{\lambda}{1 - 2k\lambda/n} \cdot \log \frac{1.25}{\delta}.$$

*Then  $\mathcal{N}(\mu_y, C^2 \Sigma_x) \approx_{\varepsilon, \delta} \mathcal{N}(\mu_x, C^2 \Sigma_x)$ .*

*Proof.* We have  $\mathcal{N}(\mu_y, C^2 \Sigma_x) \approx_{\varepsilon, \delta} \mathcal{N}(\mu_x, C^2 \Sigma_x)$  iff  $\mathcal{N}(\Sigma_x^{-1/2}(\mu_y - \mu_x), C^2 \mathbb{I}) \approx_{\varepsilon, \delta} \mathcal{N}(0, C^2 \mathbb{I})$ , since translation and multiplication by an invertible matrix are bijections. By the standard analysis of the Gaussian mechanism (Lemma 2.7), if we can prove  $\|\mu_y - \mu_x\|_{\Sigma_x} \leq \Delta_\mu$  and set  $C \geq \Delta_\mu \varepsilon^{-1} \sqrt{2 \log \frac{1.25}{\delta}}$ , then this is  $(\varepsilon, \delta)$ -differentially private.

Let  $S = \{i \in [n] : x_{i+2n} = y_{i+2n}\}$ . We have

$$\begin{aligned} \|\mu_x - \mu_y\|_{\Sigma_x} &= \left\| \frac{1}{n} \sum_{i \in [n]} x_{i+2n} - \frac{1}{n} \sum_{i \in [n]} y_{i+2n} \right\|_{\Sigma_x} \\ &= \left\| \frac{1}{n} \sum_{i \in [n] \setminus S} x_{i+2n} - y_{i+2n} \right\|_{\Sigma_x} \\ &\leq \frac{1}{n} \sum_{i \in [n] \setminus S} \|x_{i+2n} - y_{i+2n}\|_{\Sigma_x} \end{aligned}$$

Pick any point  $x_{j^*}$  for  $j^* \in S$ .

$$\|x_{i+2n} - y_{i+2n}\|_{\Sigma_x} \leq \|x_{i+2n} - x_{j^*}\|_{\Sigma_x} + \|y_{i+2n} - x_{j^*}\|_{\Sigma_x}.$$

By Lemma 4.10, the first term is at most  $2\sqrt{\lambda}$ . By Lemma 4.11, the second is at most  $\frac{1}{\sqrt{1-2k\lambda/n}}\|y_{i+2n} - x_{j^*}\|_{\Sigma_y}$ , the Mahalanobis distance under  $\Sigma_y$ . Applying Lemma 4.10 again, since  $x_{j^*} \in y$ , this is at most  $\frac{2\sqrt{\lambda}}{\sqrt{1-2k\lambda/n}}$ .  $\square$

## Acknowledgements

We thank the anonymous NeurIPS reviewers for useful suggestions on the presentation of this manuscript. Gavin Brown and Adam Smith were supported in part by NSF award CCF-1763786 as well as a Sloan Foundation research award. Marco Gaboardi was supported in part by NSF award CCF-2040222, CCF-1718220, CNS-1565365, and CNS-2040215. Jonathan Ullman and Lydia Zakyntinou were supported by NSF grants CCF-1750640, CNS-1816028, and CNS-1916020. Lydia Zakyntinou was also supported by a Facebook Fellowship.

## References

- [1] John M Abowd. The US Census Bureau adopts differential privacy. In *ACM International Conference on Knowledge Discovery & Data Mining*, KDD '18, pages 2867–2867, 2018.
- [2] Ishaq Aden-Ali, Hassan Ashtiani, and Gautam Kamath. On the sample complexity of privately learning unbounded high-dimensional gaussians. In *Proceedings of the 32nd International Conference on Algorithmic Learning Theory (ALT 2021)*, ALT '21. JMLR, Inc., March 2021. URL <https://arxiv.org/abs/2010.09929>.
- [3] Apple Differential Privacy Team. Learning with privacy at scale. *Apple Machine Learning Journal*, 1(8), 2017. <https://machinelearning.apple.com/docs/learning-with-privacy-at-scale/appliedifferentialprivacysystem.pdf>.
- [4] Rina Barber and John Duchi. Privacy and statistical risk: Formalisms and minimax bounds. *arXiv preprint arXiv:1412.4451*, 12 2014.
- [5] Sourav Biswas, Yihe Dong, Gautam Kamath, and Jonathan Ullman. COINPRESS: Practical Private Mean and Covariance Estimation. In *Advances in Neural Information Processing Systems*, NeurIPS '20, 2020. <https://arxiv.org/abs/2006.06618>.
- [6] Andrea Bittau, Úlfar Erlingsson, Petros Maniatis, Ilya Mironov, Ananth Raghunathan, David Lie, Mitch Rudominer, Ushasree Kode, Julien Tinnes, and Bernhard Seefeld. PROCHLO: Strong privacy for analytics in the crowd. In *ACM Symposium on Operating Systems Principles*, SOSP '17, pages 441–459, Shanghai, China, 2017. <https://arxiv.org/abs/1710.00901>.
- [7] Gavin Brown, Mark Bun, Vitaly Feldman, Adam Smith, and Kunal Talwar. When is memorization of irrelevant training data necessary for high-accuracy learning? *arXiv*, 2012.06421, 2021.
- [8] Mark Bun and Thomas Steinke. Concentrated differential privacy: Simplifications, extensions, and lower bounds. In *Theory of Cryptography Conference*, TCC '16, pages 635–658, Beijing, China, 2016. <https://arxiv.org/abs/1605.02065>.
- [9] Mark Bun and Thomas Steinke. Smooth sensitivity, revisited. Manuscript, 2019.
- [10] Mark Bun, Jonathan Ullman, and Salil Vadhan. Fingerprinting codes and the price of approximate differential privacy. In *ACM Symposium on the Theory of Computing*, STOC '14, pages 1–10, New York, NY, USA, 2014. <https://arxiv.org/abs/1311.3158>.

- [11] Mark Bun, Kobbi Nissim, and Uri Stemmer. Simultaneous private learning of multiple concepts. In *Proceedings of the 7th ACM Conference on Innovations in Theoretical Computer Science, ITCS '16*, pages 369–380. ACM, 2016.
- [12] Mark Bun, Thomas Steinke, and Jonathan Ullman. Make up your mind: The price of online queries in differential privacy. In *Proceedings of the 28th Annual ACM-SIAM Symposium on Discrete Algorithms, SODA '17*, pages 1306–1325, Philadelphia, PA, 2017. SIAM.
- [13] Mark Bun, Gautam Kamath, Thomas Steinke, and Zhiwei Steven Wu. Private hypothesis selection. In *Advances in Neural Information Processing Systems, NeurIPS '19*, pages 156–167, Vancouver, Canada, 2019. <https://arxiv.org/abs/1905.13229>.
- [14] Michael A Burr and Robert J Fabrizio. Uniform convergence rates for halfspace depth. *Statistics & Probability Letters*, 124:33–40, 2017.
- [15] T. Tony Cai, Yichen Wang, and Linjun Zhang. The cost of privacy: Optimal rates of convergence for parameter estimation with differential privacy. *arXiv preprint arXiv:1902.04495*, 2019.
- [16] Clément L. Canonne, Gautam Kamath, Audra McMillan, Jonathan Ullman, and Lydia Zakynthinou. Private identity testing for high dimensional distributions. *arXiv preprint arXiv:1905.11947*, 2019.
- [17] Nicholas Carlini, Chang Liu, Úlfar Erlingsson, Jernej Kos, and Dawn Song. The secret sharer: Evaluating and testing unintended memorization in neural networks. In *{USENIX} Security Symposium, ({USENIX} '19)*, pages 267–284, 2019. <https://arxiv.org/abs/1802.08232>.
- [18] Nicholas Carlini, Florian Tramer, Eric Wallace, Matthew Jagielski, Ariel Herbert-Voss, Katherine Lee, Adam Roberts, Tom Brown, Dawn Song, Úlfar Erlingsson, Alina Oprea, and Colin Raffel. Extracting training data from large language models. *arXiv preprint arXiv:2012.07805*, 2020.
- [19] Luc Devroye and Gábor Lugosi. A universally acceptable smoothing factor for kernel density estimates. *The Annals of Statistics*, 24(6):2499 – 2512, 1996. doi: 10.1214/aos/1032181164. URL <https://doi.org/10.1214/aos/1032181164>.
- [20] Luc Devroye and Gábor Lugosi. Nonasymptotic universal smoothing factors, kernel complexity and Yatracos classes. *The Annals of Statistics*, 25(6):2626 – 2637, 1997. doi: 10.1214/aos/1030741088. URL <https://doi.org/10.1214/aos/1030741088>.
- [21] Luc Devroye and Gábor Lugosi. Combinatorial methods in density estimation. In *Springer series in Statistics*, 2001.
- [22] Ilias Diakonikolas, Gautam Kamath, Daniel M Kane, Jerry Li, Ankur Moitra, and Alistair Stewart. Robust estimators in high dimensions without the computational intractability. In *IEEE Annual Symposium on Foundations of Computer Science, FOCS '16*, pages 655–664. IEEE, 2016. <https://arxiv.org/abs/1604.06443>.
- [23] Ilias Diakonikolas, Gautam Kamath, Daniel M Kane, Jerry Li, Ankur Moitra, and Alistair Stewart. Being robust (in high dimensions) can be practical. In *International Conference on Machine Learning, ICML '17*, pages 999–1008, 2017. <https://arxiv.org/abs/1703.00893>.
- [24] Ilias Diakonikolas, Gautam Kamath, Daniel M. Kane, Jerry Li, Ankur Moitra, and Alistair Stewart. Robustly learning a gaussian: Getting optimal error, efficiently. In *Proceedings of the 29th Annual ACM-SIAM Symposium on Discrete Algorithms (SODA 2018)*, SODA '18, Philadelphia, PA, USA, January 2018. SIAM. URL <https://arxiv.org/abs/1704.03866>.
- [25] Irit Dinur and Kobbi Nissim. Revealing information while preserving privacy. In *Proceedings of the 22nd ACM Symposium on Principles of Database Systems, PODS '03*, pages 202–210. ACM, 2003.

- [26] Yihe Dong, Samuel Hopkins, and Jerry Li. Quantum entropy scoring for fast robust mean estimation and improved outlier detection. In H. Wallach, H. Larochelle, A. Beygelzimer, F. d'Alché-Buc, E. Fox, and R. Garnett, editors, *Advances in Neural Information Processing Systems*, volume 32. Curran Associates, Inc., 2019. URL <https://proceedings.neurips.cc/paper/2019/file/a4d92e2cd541fca87e4620aba658316d-Paper.pdf>.
- [27] David L Donoho and Miriam Gasko. Breakdown properties of location estimates based on halfspace depth and projected outlyingness. *The Annals of Statistics*, pages 1803–1827, 1992.
- [28] Wenxin Du, Canyon Foot, Monica Moniot, Andrew Bray, and Adam Groce. Differentially private confidence intervals. *arxiv preprint arXiv:2001.02285*, 2020.
- [29] David Durfee and Ryan M Rogers. Practical differentially private top-k selection with pay-what-you-get composition. In H. Wallach, H. Larochelle, A. Beygelzimer, F. d'Alché-Buc, E. Fox, and R. Garnett, editors, *Advances in Neural Information Processing Systems*, volume 32. Curran Associates, Inc., 2019. URL <https://proceedings.neurips.cc/paper/2019/file/b139e104214a08ae3f2ebccea149cdf6e-Paper.pdf>.
- [30] Cynthia Dwork and Jing Lei. Differential privacy and robust statistics. In *Proceedings of the 41st ACM Symposium on Theory of Computing*, STOC '09, pages 371–380. ACM, 2009.
- [31] Cynthia Dwork and Guy N Rothblum. Concentrated differential privacy. *arXiv preprint arXiv:1603.01887*, 2016. <https://arxiv.org/abs/1603.01887>.
- [32] Cynthia Dwork and Sergey Yekhanin. New efficient attacks on statistical disclosure control mechanisms. In *Annual International Cryptology Conference*, pages 469–480. Springer, 2008.
- [33] Cynthia Dwork, Krishnaram Kenthapadi, Frank McSherry, Ilya Mironov, and Moni Naor. Our data, ourselves: Privacy via distributed noise generation. In *International Conference on the Theory and Applications of Cryptographic Techniques*, EUROCRYPT '06, pages 486–503, St. Petersburg, Russia, 2006.
- [34] Cynthia Dwork, Frank McSherry, Kobbi Nissim, and Adam Smith. Calibrating noise to sensitivity in private data analysis. In *Conference on Theory of Cryptography*, TCC '06, pages 265–284, New York, NY, USA, 2006.
- [35] Cynthia Dwork, Frank McSherry, and Kunal Talwar. The price of privacy and the limits of LP decoding. In *Proceedings of the thirty-ninth annual ACM symposium on Theory of computing*, pages 85–94. ACM, 2007.
- [36] Cynthia Dwork, Guy N. Rothblum, and Salil P. Vadhan. Boosting and differential privacy. In *FOCS*, pages 51–60. IEEE, 2010.
- [37] Cynthia Dwork, Kunal Talwar, Abhradeep Thakurta, and Li Zhang. Analyze gauss: optimal bounds for privacy-preserving principal component analysis. In *Proceedings of the 46th Annual ACM Symposium on the Theory of Computing*, STOC '14, pages 11–20, New York, NY, 2014. ACM.
- [38] Cynthia Dwork, Adam Smith, Thomas Steinke, Jonathan Ullman, and Salil Vadhan. Robust traceability from trace amounts. In *IEEE Symposium on Foundations of Computer Science*, FOCS '15, 2015.
- [39] Úlfar Erlingsson, Vasyl Pihur, and Aleksandra Korolova. RAPPOR: Randomized aggregatable privacy-preserving ordinal response. In *ACM Conference on Computer and Communications Security*, CCS '14, 2014.
- [40] Vitaly Feldman. Does learning require memorization? A short tale about a long tail. In *ACM Symposium on Theory of Computing*, STOC '20, pages 954–959, 2020. <https://arxiv.org/abs/1906.05271>.

- [41] Marco Gaboardi, Ryan Rogers, and Or Sheffet. Locally private mean estimation: z-test and tight confidence intervals. In Kamalika Chaudhuri and Masashi Sugiyama, editors, *Proceedings of the Twenty-Second International Conference on Artificial Intelligence and Statistics*, volume 89 of *Proceedings of Machine Learning Research*, pages 2545–2554. PMLR, 16–18 Apr 2019. URL <http://proceedings.mlr.press/v89/gaboardi19a.html>.
- [42] Badih Ghazi, Ravi Kumar, Pasin Manurangsi, and Thao Nguyen. Robust and private learning of halfspaces. In Arindam Banerjee and Kenji Fukumizu, editors, *Proceedings of The 24th International Conference on Artificial Intelligence and Statistics*, volume 130 of *Proceedings of Machine Learning Research*, pages 1603–1611. PMLR, 13–15 Apr 2021.
- [43] Samuel Haney, Ashwin Machanavajjhala, John M Abowd, Matthew Graham, Mark Kutzbach, and Lars Vilhuber. Utility cost of formal privacy for releasing national employer-employee statistics. In *Proceedings of the 2017 ACM International Conference on Management of Data*, SIGMOD ’17, pages 1339–1354, Chicago, IL, 2017. ACM.
- [44] Nils Homer, Szabolcs Szelinger, Margot Redman, David Duggan, Waibhav Tembe, Jill Muehling, John V Pearson, Dietrich A Stephan, Stanley F Nelson, and David W Craig. Resolving individuals contributing trace amounts of DNA to highly complex mixtures using high-density SNP genotyping microarrays. *PLoS genetics*, 4(8):e1000167, 2008.
- [45] Samuel B Hopkins, Jerry Li, and Fred Zhang. Robust and heavy-tailed mean estimation made simple, via regret minimization. *arxiv preprint arXiv:2007.15839*, 2020.
- [46] Roger A Horn and Charles R Johnson. *Matrix analysis*. Cambridge university press, 2012.
- [47] Ziyue Huang, Yuting Liang, and Ke Yi. Instance-optimal mean estimation under differential privacy, 2021.
- [48] Peter J Huber. *Robust statistics*, volume 523. John Wiley & Sons, 2004.
- [49] Matthew Joseph, Janardhan Kulkarni, Jieming Mao, and Steven Z. Wu. Locally private gaussian estimation. In H. Wallach, H. Larochelle, A. Beygelzimer, F. d’Alché-Buc, E. Fox, and R. Garnett, editors, *Advances in Neural Information Processing Systems*, volume 32. Curran Associates, Inc., 2019. URL <https://proceedings.neurips.cc/paper/2019/file/a588a6199feff5ba48402883d9b72700-Paper.pdf>.
- [50] Gautam Kamath, Jerry Li, Vikrant Singhal, and Jonathan Ullman. Privately learning high dimensional distributions. In *Annual Conference on Learning Theory*, COLT ’19. JMLR.org, 2019.
- [51] Gautam Kamath, Vikrant Singhal, and Jonathan Ullman. Private mean estimation of heavy-tailed distributions. In Jacob Abernethy and Shivani Agarwal, editors, *Proceedings of Thirty Third Conference on Learning Theory*, volume 125 of *Proceedings of Machine Learning Research*, pages 2204–2235. PMLR, 09–12 Jul 2020. URL <http://proceedings.mlr.press/v125/kamath20a.html>.
- [52] Haim Kaplan, Micha Sharir, and Uri Stemmer. How to find a point in the convex hull privately. In Sergio Cabello and Danny Z. Chen, editors, *36th International Symposium on Computational Geometry, SoCG 2020, June 23-26, 2020, Zürich, Switzerland*, volume 164 of *LIPIcs*, pages 52:1–52:15. Schloss Dagstuhl - Leibniz-Zentrum für Informatik, 2020. doi: 10.4230/LIPIcs.SoCG.2020.52. URL <https://doi.org/10.4230/LIPIcs.SoCG.2020.52>.
- [53] Vishesh Karwa and Salil Vadhan. Finite sample differentially private confidence intervals. In *Proceedings of the 9th Conference on Innovations in Theoretical Computer Science*, ITCS ’18, pages 44:1–44:9, Dagstuhl, Germany, 2018. Schloss Dagstuhl–Leibniz-Zentrum fuer Informatik.
- [54] Shiva Prasad Kasiviswanathan and Adam D. Smith. On the ‘semantics’ of differential privacy: A bayesian formulation. *Journal of Privacy and Confidentiality*, 2014.

- [55] Shiva Prasad Kasiviswanathan, Mark Rudelson, Adam Smith, and Jonathan Ullman. The price of privately releasing contingency tables and the spectra of random matrices with correlated rows. In *Proceedings of the 42nd ACM Symposium on Theory of Computing*, STOC '10, pages 775–784. ACM, 2010.
- [56] B. Laurent and P. Massart. Adaptive estimation of a quadratic functional by model selection. *The Annals of Statistics*, 28(5):1302–1338, 2000. ISSN 00905364. URL <http://www.jstor.org/stable/2674095>.
- [57] Xiaohui Liu, Karl Mosler, and Pavlo Mozharovskyi. Fast computation of tukey trimmed regions and median in dimension  $p > 2$ . *Journal of Computational and Graphical Statistics*, 28(3):682–697, 2019.
- [58] Xiyang Liu, Weihao Kong, Sham Kakade, and Sewoong Oh. Robust and differentially private mean estimation. *arXiv preprint arXiv:2102.09159*, 2021.
- [59] Gábor Lugosi and Shahar Mendelson. Sub-Gaussian estimators of the mean of a random vector. *The Annals of Statistics*, 47(2):783 – 794, 2019. doi: 10.1214/17-AOS1639. URL <https://doi.org/10.1214/17-AOS1639>.
- [60] Ricardo A Maronna, R Douglas Martin, Victor J Yohai, and Matías Salibián-Barrera. *Robust statistics: theory and methods (with R)*. John Wiley & Sons, 2019.
- [61] Frank McSherry and Kunal Talwar. Mechanism design via differential privacy. In *IEEE Symposium on Foundations of Computer Science*, FOCS '07, pages 94–103, Las Vegas, NV, USA, 2007.
- [62] Michael Mitzenmacher and Eli Upfal. *Probability and Computing: Randomization and Probabilistic Techniques in Algorithms and Data Analysis*. Cambridge University Press, 2nd edition, 2017. ISBN 110715488X, 9781107154889.
- [63] Kobbi Nissim, Sofya Raskhodnikova, and Adam Smith. Smooth sensitivity and sampling in private data analysis. In *Proceedings of the 30th annual ACM Symposium on Theory of Computing*, STOC, pages 75–84, 2007.
- [64] Ryan Rogers, Subbu Subramaniam, Sean Peng, David Durfee, Seunghyun Lee, Santosh Kumar Kancha, Shraddha Sahay, and Parvez Ahammad. LinkedIn’s audience engagements api: A privacy preserving data analytics system at scale. *arXiv preprint arXiv:2002.05839*, 2020.
- [65] Sriram Sankararaman, Guillaume Obozinski, Michael I Jordan, and Eran Halperin. Genomic privacy and limits of individual detection in a pool. *Nature genetics*, 41(9):965–967, 2009.
- [66] Reza Shokri, Marco Stronati, Congzheng Song, and Vitaly Shmatikov. Membership inference attacks against machine learning models. In *IEEE Symposium on Security and Privacy (S&P)*, Oakland, 2017.
- [67] Adam Smith. Privacy-preserving statistical estimation with optimal convergence rates. In *Proceedings of the 43rd Annual ACM Symposium on the Theory of Computing*, STOC '11, pages 813–822, New York, NY, USA, 2011. ACM.
- [68] Thomas Steinke and Jonathan Ullman. Interactive fingerprinting codes and the hardness of preventing false discovery. In *Annual Conference on Learning Theory*, COLT '15, 2015.
- [69] Thomas Steinke and Jonathan Ullman. Tight lower bounds for differentially private selection. In *IEEE Symposium on Foundations of Computer Science*, FOCS '17, 2017.
- [70] David Tastuggine and Ilya Mironov. Introducing Opacus: A high-speed library for training PyTorch models with differential privacy. Facebook AI Blog, 2020. <https://ai.facebook.com/blog/introducing-opacus-a-high-speed-library-for-training-pytorch-models-with-differential-privacy/>.
- [71] John D. Tukey. A survey of sampling from contaminated distributions. *Contributions to Probability and Statistics: Essays in Honor of Harold Hotelling*, pages 448–485, 1960.

- [72] Salil Vadhan. The complexity of differential privacy. <http://privacytools.seas.harvard.edu/publications/complexity-differential-privacy>, 2016.
- [73] Vladimir Naumovich Vapnik and Aleksei Yakovlevich Chervonenkis. On uniform convergence of the frequencies of events to their probabilities. *Teoriya Veroyatnostei i ee Primeneniya*, 16(2):264–279, 1971.
- [74] Martin J. Wainwright. *High-Dimensional Statistics: A Non-Asymptotic Viewpoint*. Cambridge Series in Statistical and Probabilistic Mathematics. Cambridge University Press, 2019. doi: 10.1017/9781108627771.
- [75] Royce J Wilson, Celia Yuxin Zhang, William Lam, Damien Desfontaines, Daniel Simmons-Marengo, and Bryant Gipson. Differentially private sql with bounded user contribution. *Proceedings on Privacy Enhancing Technologies*, 2020(2):230–250, 2020. <https://arxiv.org/abs/1909.01917>.
- [76] Yannis G. Yatracos. Rates of Convergence of Minimum Distance Estimators and Kolmogorov’s Entropy. *The Annals of Statistics*, 13(2):768 – 774, 1985. doi: 10.1214/aos/1176349553. URL <https://doi.org/10.1214/aos/1176349553>.
- [77] Samuel Yeom, Irene Giacomelli, Matt Fredrikson, and Somesh Jha. Privacy risk in machine learning: Analyzing the connection to overfitting. In *IEEE Computer Security Foundations Symposium, CSF ’18*, pages 268–282, 2018. <https://arxiv.org/abs/1709.01604>.

## A Linear Algebra Background

In this section, we present a short introduction to facts from linear algebra, which we use often in our proofs.

For any matrix  $A$ , we will denote by  $\lambda_i(A)$  and by  $\sigma_i(A)$  the  $i$ -th largest eigenvalue and singular value of  $A$ , respectively. We only consider real matrices  $A \in \mathbb{R}^{d \times d}$ .

**Proposition A.1** (Properties of eigenvalues and singular values). *For any real matrix  $A \in \mathbb{R}^{d \times d}$ ,*

$$\sigma_i^2(A) = \lambda_i(A^T A) \quad \text{and} \quad \sum_{i=1}^k |\lambda_i(A)| \leq \sum_{i=1}^k \sigma_i(A) \quad \forall k \leq d.$$

*If  $A$  is symmetric, then  $|\lambda_i(A)| = \sigma_i(A)$  for all  $i \in [d]$ .*

**Definition A.2** (Matrix norms). Let  $A \in \mathbb{R}^{d \times d}$  be any square matrix.

- The *trace norm* (or *nuclear norm*) of  $A$  is  $\|A\|_{\text{tr}} = \text{tr}(\sqrt{A^T A}) = \sum_{i=1}^d \sigma_i(A)$ .
- The *Frobenius norm* of  $A$  is  $\|A\|_F = \sqrt{\sum_{j=1}^d \sum_{i=1}^d |a_{i,j}|^2} = \sqrt{\text{tr}(A^T A)} = \sqrt{\sum_{i=1}^d \sigma_i^2(A)}$ .
- The *spectral norm* of  $A$  is  $\|A\|_2 = \sup\{\|Ax\|_2 : x \in \mathbb{R}^d \text{ s.t. } \|x\|_2 = 1\} = \sqrt{\lambda_1(A^T A)} = \sigma_1(A)$ .

By straightforward comparison of the definitions above,  $\|A\|_2 \leq \|A\|_F \leq \|A\|_{\text{tr}}$ .

We measure the error of our estimator using the Mahalanobis distance.

**Definition A.3** (Mahalanobis distance). For any vector  $v \in \mathbb{R}^d$  and any positive definite matrix  $\Sigma$ , the *Mahalanobis distance* of  $v$  with respect to  $\Sigma$  is defined as  $\|v\|_{\Sigma} = \|\Sigma^{-1/2}v\|_2$ .

Also note that we can write  $\|v\|_{\Sigma}^2 = v^T \Sigma^{-1} v$ .

**Proposition A.4.** *For any vectors  $u$  and  $v$ ,  $\|uv^T\|_2 \leq u^T v$ . Furthermore, for any vector  $v$ ,  $\text{tr}(vv^T) = \|vv^T\|_{\text{tr}} = \|vv^T\|_2 = v^T v$ .*

## B Subgaussian Data

In this section, we extend our analysis of Algorithm 2 to show that its guarantees hold even if the data are subgaussian, instead of the stricter Gaussian assumption used previously.

### B.1 Useful Facts and Definitions

To formalize our setting, let us first state useful definitions and concentration inequalities for subgaussian distributions and data sets.

**Definition B.1** (Subgaussian random variable). A random variable  $v \in \mathbb{R}$  with mean  $\mathbb{E}[v] = \mu$  is  $\sigma^2$ -subgaussian if  $\mathbb{E}[e^{\lambda(v-\mu)}] \leq e^{\lambda^2 \sigma^2 / 2}$  for all  $\lambda \in \mathbb{R}$ .

In this case, we write  $v \sim \text{subG}(\sigma^2)$ , slightly abusing notation, since  $\text{subG}(\sigma^2)$  represents a family rather than a single distribution. We also write  $P \in \text{subG}(\sigma^2)$  if  $P$  is a subgaussian distribution with parameter  $\sigma^2$ . In the  $d$ -dimensional case, we define subgaussian distributions as follows. We write  $P_{\mu, \Sigma}$  to denote that the mean and covariance of the distribution are  $\mu$  and  $\Sigma$ , respectively.

**Definition B.2** (Subgaussian distribution). Let  $P_{\mu, \Sigma}$  be a distribution over  $\mathbb{R}^d$  with mean  $\mu$  and covariance  $\Sigma > 0$ . For a constant  $c > 0$ , we say that  $P_{\mu, \Sigma}$  is subgaussian with parameter  $c\Sigma$ , if for  $v \sim P_{\mu, \Sigma}$  and all unit vectors  $u$ , the distribution of  $v^T u$  is  $c(u^T \Sigma u)$ -subgaussian (as in Definition B.1). That is, for all  $u \in \mathbb{R}^d$  such that  $\|u\|_2 = 1$ ,

$$\mathbb{E}_{v \sim P_{\mu, \Sigma}} [e^{\lambda u^T (v - \mu)}] \leq e^{c\lambda^2 (u^T \Sigma u) / 2} \quad \text{for all } \lambda \in \mathbb{R}.$$

We write  $P_{\mu, \Sigma} \in \text{subG}(c\Sigma)$ . Intuitively, a distribution is subgaussian if it concentrates at least as well as a Gaussian along every univariate projection. We note that although Definition B.2 above is not the “textbook” definition (compare with [74], for example), it has appeared often in the relevant literature (see e.g. [59, 26]).

Concentration inequalities, analogous to those in Lemma 4.5 for Gaussian data, hold for subgaussian data:

**Lemma B.3** (Extension of Lemma 4.5). Let  $u_i$  be i.i.d.  $d$ -dimensional samples for  $i \in [n]$  drawn from a distribution  $P_{0, \mathbb{I}}$  with mean  $\mu = 0$  and covariance  $\Sigma = \mathbb{I}$ , such that  $P_{0, \mathbb{I}} \in \text{subG}(c\mathbb{I})$  for some constant  $c > 0$ . Define the estimator  $\hat{\Sigma} = \frac{1}{n} \sum_{i=1}^n u_i u_i^T$ . For every  $\beta > 0$ , the following conditions hold with probability  $1 - \beta$ :

$$\left(1 - O\left(\sqrt{\frac{d + \log(1/\beta)}{n}}\right)\right) \cdot \mathbb{I} \leq \hat{\Sigma} \leq \left(1 + O\left(\sqrt{\frac{d + \log(1/\beta)}{n}}\right)\right) \cdot \mathbb{I} \quad (39)$$

$$\forall i \in [n] \quad \|u_i\|_2^2 \leq O(d \log(n/\beta)) \quad (40)$$

Observe that if  $P_{0, \Sigma}$ , with mean  $\mu = 0$  and covariance  $\Sigma > 0$ , is a  $c\Sigma$ -subgaussian distribution for some  $c > 0$ , then for any  $x \sim P_{0, \Sigma}$  there exists  $u = \Sigma^{-1/2} x$  with  $u \sim P_{0, \mathbb{I}}$ , where  $P_{0, \mathbb{I}} \in \text{subG}(c\mathbb{I})$  with mean  $\mu = 0$  and covariance  $\mathbb{I}$ . Using this observation and the lemma above, we have the following more general concentration facts for subgaussian distributions.

**Lemma B.4** (Extension of Lemma 4.6). Let  $x_i \forall i \in [n]$  be i.i.d.  $d$ -dimensional samples from  $P_{0, \Sigma}$ , with mean  $\mu = 0$  and covariance  $\Sigma$ , such that  $P_{0, \Sigma} \in \text{subG}(c\Sigma)$  for some constant  $c > 0$ . Define the estimator  $\hat{\Sigma}_x = \frac{1}{n} \sum_{i=1}^n x_i x_i^T$ . For every  $\beta > 0$ , the following conditions hold with probability  $1 - \beta$ :

$$\left(1 - O\left(\sqrt{\frac{d + \log(1/\beta)}{n}}\right)\right) \cdot \Sigma \leq \hat{\Sigma}_x \leq \left(1 + O\left(\sqrt{\frac{d + \log(1/\beta)}{n}}\right)\right) \cdot \Sigma \quad (41)$$

$$\forall i \in [n] \quad \|x_i\|_2^2 \leq O(\lambda_1(\Sigma) \cdot d \log(n/\beta)) \quad (42)$$

We will also use the following standard concentration inequality for the empirical mean of a subgaussian data set.

**Lemma B.5** (Mean of Subgaussian Vectors). *Let  $u_i$  be i.i.d.  $d$ -dimensional samples for  $i \in [n]$  drawn from a distribution  $P_{0,\mathbb{I}}$  with mean  $\mu = 0$  and covariance  $\Sigma = \mathbb{I}$ , such that  $P_{0,\mathbb{I}} \in \text{subG}(c\mathbb{I})$  for some constant  $c > 0$ . For any  $\beta > 0$ , with probability at least  $1 - \beta$ ,*

$$\left\| \frac{1}{n} \sum_{i=1}^n u_i \right\|_2 = O\left(\sqrt{\frac{d + \log(1/\beta)}{n}}\right).$$

## B.2 Guarantees of Algorithm 2 for Subgaussian Data

**Theorem B.6** (Privacy and Accuracy of the Empirically Rescaled Gaussian Mechanism for Subgaussian Data). *For any  $\varepsilon > 0$ ,  $0 < \delta < 1$ , Algorithm 2 is  $(3\varepsilon, e^\varepsilon(1 + e^\varepsilon)\delta)$ -differentially private. There exists an absolute constant  $C$  such that, for any  $0 < \alpha, \beta, \varepsilon, \delta < 1$ , mean  $\mu$ , and positive definite  $\Sigma$ , if  $x \sim P_{\mu,\Sigma}^{\otimes n}$ , where  $P_{\mu,\Sigma} \in \text{subG}(c\Sigma)$  for some constant  $c > 0$ , and*

$$n \geq C \left( \frac{d}{\alpha^2} \log \frac{1}{\beta} + \frac{d}{\alpha \varepsilon^2} \log^3 \frac{1}{\delta \beta} \cdot \log \frac{d \log(1/\delta \beta)}{\alpha \varepsilon} \right), \quad (43)$$

*then with probability at least  $1 - 3\beta$ , Algorithm 2 returns  $\mathcal{A}_{\varepsilon,\delta,\beta}^G(x) = \hat{\mu}$  such that  $\|\hat{\mu} - \mu\|_\Sigma \leq \alpha$ .*

*Proof Sketch.* Notice first that the privacy guarantees of Algorithm 2 do not depend on the assumption that the data distribution is Gaussian. Therefore, the privacy analysis of Section 4.2 remains the same. The accuracy analysis follows the same steps, with two modifications: we need to prove that with high probability subgaussian data fall into the good set  $\mathcal{G}(\lambda)$  with the same parameter  $\lambda$  (Lemma B.7 below – an extension of Lemma 4.7) and that with high probability, for the given sample complexity, the error is upper bounded by  $\alpha$  (Lemma B.8 below – an extension of Lemma 4.8). Plugging the new lemmas into the accuracy analysis of Algorithm 2 completes the proof of the theorem.  $\square$

**Lemma B.7** (Extension of Lemma 4.7). *Suppose that  $x \sim P_{\mu,\Sigma}^{\otimes 3n}$ , where  $P_{\mu,\Sigma}$  is a distribution with mean  $\mu$ , covariance  $\Sigma$ , such that  $P_{\mu,\Sigma} \in \text{subG}(c\Sigma)$  for some constant  $c > 0$ . Let  $n = \Omega(d + \log(1/\beta))$ . There exists a  $\lambda = O(d \log(n/\beta))$  such that, with probability at least  $1 - \beta$  we have  $x \in \mathcal{G}(\lambda)$ .*

The proof of the lemma is omitted since it follows the same steps as the proof of Lemma 4.7, except that the use of the concentration properties of Gaussians stated in Lemma 4.6 is replaced by the use of the concentration properties of subgaussians stated in Lemma B.4.

**Lemma B.8** (Extension of Lemma 4.8). *Suppose that  $x \sim P_{\mu,\Sigma}^{\otimes 3n}$ , where  $P_{\mu,\Sigma}$  is a distribution with mean  $\mu$  and covariance  $\Sigma$ , such that  $P_{\mu,\Sigma} \in \text{subG}(c\Sigma)$  for some constant  $c > 0$ . Let  $n = \Omega(\max\{(d + \log(1/\beta)), k\lambda\})$ , where parameters  $k, \lambda$  are set as in Algorithm 2. Then with probability at least  $1 - \beta$ , for  $\hat{\mu} \sim \mathcal{N}(\mu_x, C^2 \Sigma_x)$ ,*

$$\|\hat{\mu} - \mu\|_\Sigma = O\left(\sqrt{\frac{d}{n} \cdot \log \frac{1}{\beta}} + \frac{d}{\varepsilon^2 n} \log^2 \frac{1}{\delta \beta} \cdot \sqrt{\log \frac{n}{\beta}}\right).$$

*Proof Sketch.* By the triangle inequality, we have that

$$\|\hat{\mu} - \mu\|_\Sigma \leq \|\mu - \mu_x\|_\Sigma + \|\mu_x - \hat{\mu}\|_\Sigma. \quad (44)$$

The first term can be written as  $\|\mu - \mu_x\|_\Sigma = \|\frac{1}{n} \sum_{i=1}^n \Sigma^{-1/2}(x_{i+2n} - \mu)\|_2 = \|\frac{1}{n} \sum_{j=1}^n u_i\|_2$ , where  $u_i \sim P_{0,\mathbb{I}} \forall i \in [n]$  are subgaussian vectors with mean 0, covariance  $\mathbb{I}$ , and  $P_{0,\mathbb{I}} \in \text{subG}(c\mathbb{I})$ . By Lemma B.5, with probability at least  $1 - \beta/2$ , it holds that

$$\|\mu - \mu_x\|_\Sigma = O\left(\sqrt{\frac{d + \log \frac{1}{\beta}}{n}}\right). \quad (45)$$

The second term is bounded via the same steps as in the proof of Lemma 4.8, as the distribution of  $\hat{\mu}$  has not changed (it is still drawn from a Gaussian with mean  $\mu_x$  and covariance  $C^2 \Sigma_x$ ). This yields Eq. (28). Combining the latter with Eq. (45) via a union bound and following the same calculations as in the proof of Lemma 4.8 will complete the proof.  $\square$

## C Finite Implementations of Our Algorithms

### C.1 Technical Tools

In this section we will give differentially private algorithms for estimating the largest and smallest eigenvalues of the covariance matrix  $\Sigma$ , denoted  $\lambda_1$  and  $\lambda_d$ , as well as an enclosing box for the data  $[-R, R]^d$ . We start by describing a building block for both of these algorithms: the Stable Histogram of [11].

---

**Algorithm 3**  $\text{StableHistogram}_{\varepsilon, \delta}(\{z_i\}, \{B_b\})$ , from [11]

---

**Require:** Items  $z_1, \dots, z_n \in \mathcal{U}$ . Bins  $\{B_b\}_{b \in \mathbb{Z}}$ . Privacy parameters  $\varepsilon, \delta > 0$ .

```

1: for  $b \in \mathbb{Z}$  do
2:    $c_b \leftarrow |\{i : z_i \in B_b\}|$ 
3: for  $b$  with  $c_b > 0$  do
4:    $\tilde{c}_b \leftarrow c_b + \text{Lap}(2/\varepsilon)$ 
5:  $\tau \leftarrow 1 + \frac{2 \log(1/\delta)}{\varepsilon}$ 
6: return  $\{(b, \tilde{c}_b) : b \in \mathbb{Z} \text{ and } \tilde{c}_b \geq \tau\}$ .
```

---

We now state the guarantees of Stable Histogram, in a form which will be useful for our next steps.

**Lemma C.1** (Stable Histogram Guarantees).  $\text{StableHistogram}_{\varepsilon, \delta}$  is  $(\varepsilon, \delta)$ -differentially private. Let  $z_1, \dots, z_n$  be drawn i.i.d. from distribution  $P$ . Suppose that there exists  $b \in \mathbb{Z}$  and a constant  $\beta' < \frac{1}{4}$ , such that  $\Pr[z_i \notin B_{b-1} \cup B_b \cup B_{b+1}] \leq \beta'$  for any fixed  $i \in [n]$ . Let  $b^* = \arg \max_b \tilde{c}_b$ , where  $\{(b, \tilde{c}_b)\} = \text{StableHistogram}_{\varepsilon, \delta}(z_1, \dots, z_n)$ . There exists a constant  $C > 0$  such that, for all  $0 < \varepsilon, \beta, \delta < 1$ , if

$$n \geq \frac{C}{\varepsilon} \log \frac{1}{\beta \delta},$$

then with probability at least  $1 - \beta$ ,  $b^* \in \{b - 1, b, b + 1\}$ .

A proof of the privacy guarantee can be found in [72, Theorem 3.5]. A slightly larger (by logarithmic factors) sample complexity guarantee than the one stated above can be proven in a straightforward way, using intermediate results of the proof of [53, Lemma 2.3]. However, we provide a proof of the tighter sample complexity bound stated here, for completeness.

*Proof.* Note that the  $z_i$  are independent. There are at most 3 “good bins”  $b - 1, b, b + 1$  and  $\Pr[z_i \in \text{good bins}] \geq 1 - \beta'$ . There must be a heaviest good bin, which we call the “best bin”  $b_1$ , such that  $\Pr[z_i \in B_{b_1}] \geq \frac{1 - \beta'}{3}$ . The bad bins collectively satisfy  $\Pr[z_i \in \text{bad bins}] \leq \beta'$ .

Let random variable  $X_{\text{best}}$  be the number of items that fall into the best bin and  $X_{\text{bad}}$  be the number of items that fall into *any* of the bad bins. Since both these random variables are sums of independent 0 – 1 trials, we apply Chernoff bounds [62, Theorems 4.4, 4.5]. We have  $\mathbb{E}[X_{\text{best}}] \geq \frac{1 - \beta'}{3}n$  and  $\mathbb{E}[X_{\text{bad}}] \leq \beta'n$ . Introduce constants  $\gamma_1, \gamma_2 > 0$  so that

$$\beta' + \gamma_1 < \frac{1 - \beta'}{3} - \gamma_2.$$

Then we can bound

$$\Pr[X_{\text{bad}} \geq n(\beta' + \gamma_1)] = \Pr[X_{\text{bad}} \geq \beta'n(1 + \gamma_1/\beta')] \leq \exp\left\{-\frac{\gamma_1^2 n}{3\beta'}\right\} \quad (46)$$

and

$$\Pr\left[X_{\text{best}} \leq m\left(\frac{1 - \beta'}{3} - \gamma_2\right)\right] = \Pr\left[X_{\text{best}} \geq \frac{(1 - \beta')n}{3}(1 - 3\gamma_2/(1 - \beta'))\right] \quad (47)$$

$$\leq \exp\left\{-\frac{3\gamma_2^2 n}{2(1 - \beta')}\right\} \quad (48)$$

Conditioned on the best bin  $b_1$  receiving sufficiently many items, we need to ensure that its noisy count is (i) not suppressed and (ii) higher than that of any bad bin. Introduce a third constant  $\gamma_3 > 0$  and define random variable  $Z \sim \text{Lap}(1/\varepsilon)$ .

$$\begin{aligned} \Pr\left[X_{\text{best}} + Z \leq m\left(\frac{1-\beta'}{3} - \gamma_3\right) \middle| X_{\text{best}} \geq n\left(\frac{1-\beta'}{3} - \gamma_2\right)\right] &\leq \Pr[Z \leq n(\gamma_2 - \gamma_3)] \\ &= \Pr[Z \geq n(\gamma_3 - \gamma_2)] \quad (\text{flip the signs}) \\ &\leq \frac{1}{2} \exp\{-\varepsilon n(\gamma_3 - \gamma_2)\}. \end{aligned} \quad (49)$$

To avoid suppression, we require  $n\left(\frac{1-\beta'}{3} - \gamma_3\right) > 1 + \frac{\log(1/\delta)}{\varepsilon}$ . Since  $\beta'$  and  $\gamma_3$  are constants, this means  $n = \Omega(\log(1/\delta)/\varepsilon)$ . Similarly, for any single bad bin we must control

$$\Pr[Z \geq n(\gamma_3 - \gamma_1)] \leq \frac{1}{2} \exp\{-\varepsilon n(\gamma_3 - \gamma_1)\}. \quad (51)$$

We do not mind if the bad bins get suppressed. We will take a union bound over the (no more than)  $n$  bad bins.

We want to bound the probability that  $b^* = \arg \max_b \tilde{c}_b$  belongs in any of the bad bins. Putting the pieces together, we need to apply the union bound over the following bad events: (i) the best bin fails to receive enough items, (ii) the bad bins (collectively) receive too many items, (iii) too much (negative) noise is added to the best bin, and (iv) too much (positive) noise is added to *any* of the bad bins that received an item.

$$\Pr[b^* \notin \{b-1, b, b+1\}] \leq e^{-\frac{\gamma_1^2 n}{3\beta'}} + e^{-\frac{3\gamma_2^2 n}{2(1-\beta')}} + \frac{1}{2} e^{-\varepsilon n(\gamma_3 - \gamma_2)} + \frac{n}{2} e^{-\varepsilon n(\gamma_3 - \gamma_1)}. \quad (52)$$

With  $\beta' < \frac{1}{4}$ , we can take  $\gamma_1, \gamma_2$ , and  $\gamma_3$  to be constants. And, if we set  $\gamma_3 - \gamma_1 > \gamma_3 - \gamma_2$  (i.e.  $\gamma_2 > \gamma_1$ ) then asymptotically we don't have to pay for the union bound over bad bins and we get  $\Pr[b^* \notin \{b-1, b, b+1\}] = O(e^{-cn})$  for some constant  $c$ . For this to be less than  $\beta$ , we need  $n = \Omega(\log(1/\beta)/\varepsilon)$ . We also had  $n = \Omega(\log(1/\delta)/\varepsilon)$ , so we require that  $n = \Omega(\log(1/\beta\delta)/\varepsilon)$ .  $\square$

### C.1.1 Private Eigenvalue Estimation

We now give an  $(\varepsilon, \delta)$ -differentially private algorithm, based on the well-known *Sample-and-Aggregate* framework [63]. We denote by  $\lambda_k(A)$  the  $k$ -th largest eigenvalue of matrix  $A$ .

---

**Algorithm 4** Private Eigenvalue Estimation via Sample and Aggregate:  $\text{Eigen}_{\varepsilon, \delta, \beta}(x, k)$

---

**Require:** Data set  $x = (x_1, \dots, x_n)^T \in \mathbb{R}^{n \times d}$ . Index  $k \in [d]$ . Privacy parameters  $\varepsilon, \delta > 0$ . Failure probability  $\beta > 0$ .

- 1: Initialize  $m \leftarrow \Omega(\log(1/\delta\beta)/\varepsilon)$ .
  - 2: **for**  $i \in [m]$  **do**
  - 3:    $\hat{\Sigma} \leftarrow \frac{m}{n} \sum_{j=1}^{n/m} (x_{\frac{n}{m}(i-1)+j}^{\frac{n}{m}})(x_{\frac{n}{m}(i-1)+j}^{\frac{n}{m}})^T$  ▷ empirical covariance of block  $i \in [m]$
  - 4:    $\hat{\lambda}_k^{(i)} \leftarrow \lambda_k(\hat{\Sigma})$
  - 5:    $z_i \leftarrow \text{Round}(\hat{\lambda}_k^{(i)})$ , rounded down to the nearest  $2^q$  for  $q \in \mathbb{Z}$
  - 6:    $\{(b, \tilde{c}_b)\} \leftarrow \text{StableHistogram}_{\varepsilon, \delta}(\{z_i\}, \{B_b\})$  for bins  $B_b = [2^b, 2^{b+1})$ .
  - 7:    $b^* \leftarrow \arg \max_b \tilde{c}_b$
  - 8: **return**  $2^{b^*}$
- 

**Lemma C.2** (Private Estimate of Smallest/Largest Eigenvalue). *Algorithm 4 is  $(\varepsilon, \delta)$ -differentially private. Suppose  $x$  is drawn i.i.d. from a distribution  $P_{0, \Sigma}$  with mean 0, covariance  $\Sigma$ , and that  $P \in \text{subG}(c\Sigma)$  for constant  $c > 0$ . There exists a constant  $C > 0$  such that for any  $0 < \varepsilon, \delta, \beta < 1, k \in [d]$ , if*

$$n \geq C \frac{d}{\varepsilon} \log\left(\frac{1}{\delta\beta}\right), \quad (53)$$

with probability at least  $1 - \beta$ , Algorithm 4 returns an estimate  $\hat{\lambda}_k$  such that  $\frac{1}{4}\lambda_k(\Sigma) \leq \hat{\lambda}_k \leq 4\lambda_k(\Sigma)$ .

*Proof.* The privacy guarantee is inherited by the guarantee of the Stable Histogram (Lemma C.1). From Lemma B.4, if  $n/m$  (the number of samples in each block) is  $\Omega(d)$  then with probability  $1 - \beta'$  for a constant  $\beta' < \frac{1}{4}$ , we get  $\frac{1}{2}\lambda_k(\Sigma) \leq \hat{\lambda}_k^{(i)} \leq 2\lambda_k(\Sigma)$  for any fixed  $i \in [m]$ . Let  $\lambda_k(\Sigma) \in B_b$ , that is,  $B_b$  is the bin that the rounding of the true eigenvalue would fall into. By the previous guarantee, if  $n/m = \Omega(d)$ , we can write for any fixed  $i \in [m]$ ,

$$\Pr[z_i \notin B_{b-1} \cup B_b \cup B_{b+1}] \leq \beta'.$$

The hypotheses of Lemma C.1 are then satisfied, and it follows that, there exists a constant  $C > 0$  such that if  $m \geq \frac{C}{\epsilon} \log \frac{1}{\beta\delta}$ , then

$$\Pr[b^* \notin \{b-1, b, b+1\}] \leq \beta.$$

Combining the conditions on the number of samples, if

$$n = \Omega(dm) = \Omega\left(\frac{d}{\epsilon} \log \frac{1}{\beta\delta}\right),$$

then with probability at least  $1 - \beta$ , Algorithm 4 returns  $\hat{\lambda}_k \in B_{b-1} \cup B_b \cup B_{b+1}$ . Equivalently, with probability  $1 - \beta$ , it returns  $\frac{1}{4}\lambda_k(\Sigma) \leq \hat{\lambda}_k \leq 4\lambda_k(\Sigma)$ .  $\square$

### C.1.2 Private Range Estimation

---

**Algorithm 5** Private Range Estimation, from [53]:  $\text{Range}_{\epsilon, \delta, \beta}(x, \sigma^2)$

---

**Require:** Data set  $x = (x_1, \dots, x_n)^T \in \mathbb{R}^{n \times d}$ . Privacy parameters  $\epsilon, \delta > 0$ . Failure probability  $\beta > 0$ . Variance upper bound  $\sigma^2$ .

- 1: **for**  $j \in [d]$  **do**
  - 2:    $z_i \leftarrow x_{i,j}$  for all  $i \in [n]$  ▷ Choose the  $j$ -th coordinate from each sample  $i \in [n]$
  - 3:    $\{(b, \tilde{c}_b)\} \leftarrow \text{StableHistogram}_{\frac{\epsilon}{d}, \frac{\delta}{d}}(\{z_i\}, \{B_b\})$  for bins  $B_b = [3\sigma b, 3\sigma(b+1))$ .
  - 4:    $b_j^* \leftarrow \arg \max_b \tilde{c}_b$
  - 5:    $X_{min}^j \leftarrow 3\sigma b_j^* - 11\sigma \log \frac{nd}{\beta}$
  - 6:    $X_{max}^j \leftarrow 3\sigma b_j^* + 11\sigma \log \frac{nd}{\beta}$
  - 7: **return**  $\{(X_{min}^j, X_{max}^j)\}_{j \in [d]}$
- 

The algorithm above follows a standard approach for range estimation of univariate Gaussian data sets, applied  $d$  times—one for each coordinate  $i \in [d]$ . In particular, Karwa and Vadhan [53] prove the guarantees of the algorithm for Gaussian data sets. Liu et al. [58] also prove its guarantees for subgaussian data sets with identity covariance and corruptions. Since neither of the two covers our exact case, we provide a modification of their proofs below.

**Lemma C.3** (Private Range Estimate). *Algorithm 5 is  $(\epsilon, \delta)$ -differentially private. Suppose  $x$  is drawn i.i.d. from a distribution  $P_{\mu, \Sigma}$  with mean  $\mu$  and covariance  $\Sigma$ , and that for every coordinate  $j \in [d]$  if  $z \sim P_{\mu, \Sigma}$  then  $z_j$  is  $\sigma^2$ -subgaussian. There exists a constant  $C > 0$  such that for any  $0 < \epsilon, \delta, \beta < 1$ , if*

$$n \geq C \frac{d}{\epsilon} \log \left( \frac{d}{\delta\beta} \right), \tag{54}$$

with probability at least  $1 - 2\beta$ , Algorithm 5 returns an estimate  $\{(X_{min}^j, X_{max}^j)\}_{j \in [d]}$  such that for all  $i \in [n]$ ,  $j \in [d]$ ,  $x_{i,j} \in [X_{min}^j, X_{max}^j]$ .

*Proof.* The privacy guarantee is inherited by the Stable Histogram algorithm, via composition (Lemma 2.3).<sup>6</sup> By an equivalent definition of  $\sigma^2$ -subgaussian random variables, we have that for all  $j \in [d]$ ,

$$\Pr[|x_{i,j} - \mu_j| > t] \leq 2e^{-t^2/2\sigma^2}. \quad (55)$$

Setting  $t = 3\sigma$ , we have that  $\Pr[|x_{i,j} - \mu_j| > 3\sigma] \leq \beta'$ , for  $\beta' = 0.03 < 1/4$ . Suppose  $\mu_j \in B_b$ , for some bin  $b$ . Then, we have that  $\Pr[z_i \notin B_{b-1} \cup B_b \cup B_{b+1}] \leq \beta'$ .

Therefore, the hypothesis of Lemma C.1 is satisfied and so, if  $n = \Omega(\frac{d}{\varepsilon} \log \frac{d}{\delta\beta})$ , with probability  $1 - \beta/d$ , we return  $b_j^*$  such that  $b_j^* \in \{b - 1, b, b + 1\}$ . Equivalently, with probability  $1 - \beta$ , for all  $j \in [d]$  simultaneously,

$$|\mu_j - 3\sigma b_j^*| \leq 9\sigma. \quad (56)$$

By the bound on subgaussian tails of Eq. (55) and a union bound, with probability  $1 - \beta$ , for all  $i \in [n]$ ,  $j \in [d]$ ,

$$|x_{i,j} - \mu_j| \leq \sqrt{2\sigma^2 \log \frac{nd}{\beta}} \leq 2\sigma \log \frac{nd}{\beta} \quad (57)$$

Combining Eq. 57 and 56, with probability at least  $1 - 2\beta$ , for all  $i \in [n]$ ,  $j \in [d]$ ,

$$x_{i,j} \in [3\sigma b_j^* - 11\sigma \log \frac{nd}{\beta}, 3\sigma b_j^* + 11\sigma \log \frac{nd}{\beta}].$$

□

## C.2 A Finite Implementation of Algorithm 1

We modify Algorithm 1 (using our private eigenvalue and bounding-box estimates) by running the original algorithm with the data space  $\mathbb{R}^d$  replaced by a finite grid of points  $\mathcal{Q}_{\alpha'}$ . For simplicity, we work with data sets of size  $2n$ .

---

### Algorithm 6 Finite Implementation of $\mathcal{A}_{\varepsilon,\delta,t}^E(x)$

---

**Require:** Data set  $x = (x_1, \dots, x_{2n})^T \in \mathbb{R}^{2n \times d}$ . Privacy parameters:  $\varepsilon, \delta > 0$ . Accuracy parameters:  $\alpha, \beta > 0$ .

#### Stage 1: Range estimates

- 1: Construct data set  $u \in \mathbb{R}^{n \times d}$  where  $u_i = (x_i - x_{i+n})/\sqrt{2}$ ,  $i \in [n]$ .
- 2:  $\hat{\lambda}_1 \leftarrow \text{Eigen}_{\varepsilon,\delta,\beta}(u, 1)$  ▷ private estimate of largest eigenvalue
- 3:  $\hat{\lambda}_d \leftarrow \text{Eigen}_{\varepsilon,\delta,\beta}(u, d)$  ▷ private estimate of smallest eigenvalue
- 4:  $\sigma^2 \leftarrow 4\hat{\lambda}_1$  ▷ upper bound on variance in every direction
- 5:  $\{X_{\min}^j, X_{\max}^j\}_{j \in [d]} \leftarrow \text{Range}_{\varepsilon,\delta,\beta}(x, \sigma^2)$
- 6: Set

$$\alpha' \leftarrow O\left(\frac{\alpha\sqrt{\hat{\lambda}_d}}{d}\right). \quad (58)$$

- 7:  $R \leftarrow \alpha' + \max_j \max\{|X_{\max}^j|, |X_{\min}^j|\}$

#### Stage 2: Discretize

- 8:  $\mathcal{Q}_{\alpha'} \leftarrow \alpha'$ -fine grid over  $[-R, R]^d$ .
- 9: For all  $i \in [n]$ , let  $x_i^\Delta = \arg \min_{p \in \mathcal{Q}_{\alpha'}} \|p - x_i\|_1$ .

#### Stage 3: Run the algorithm

- 10: Run  $\mathcal{A}_{\varepsilon,\delta,t}^E(x^\Delta)$ .
- 

<sup>6</sup>Note that by using advanced composition [36], we could have set the privacy parameter of StableHistogram to  $\approx \varepsilon/\sqrt{d}$  but since this is not the sample complexity bottleneck, we did not.

**Privacy.** Since the discretization process doesn't affect the privacy analysis of Algorithm 1, the overall privacy follows from composition and the privacy analyses in C.1.

**Computation.** Tukey depth can be computed in time  $\tilde{O}(n^d)$  [57]. Since we can run the restricted exponential mechanism over the grid  $Q_{\alpha'}$ , it remains to describe how, given  $x^\Delta$ , we can compute the distance to the set  $\text{UNSAFE}_{(\varepsilon, \delta, t)}$ . First note that, given two data sets  $y, y' \in Q_{\alpha'}$ , we can check whether  $\mathcal{M}_{\varepsilon, t}(y) \approx_{\varepsilon, \delta} \mathcal{M}_{\varepsilon, t}(y')$  by computing the distributions explicitly. Thus, by iterating over all neighbors of any data set  $y$ , we can check if  $y \in \text{UNSAFE}_{(\varepsilon, \delta, t)}$ . With this, computing the distance to  $\text{UNSAFE}_{(\varepsilon, \delta, t)}$  requires iterating over all data sets in  $Q_{\alpha'}$ , which are at most  $\left(\frac{2R}{\alpha'}\right)^{dn} = \tilde{O}\left(\frac{d(\|\mu\|_\infty/\sqrt{\lambda_d} + \sqrt{\kappa})}{\alpha}\right)^{dn}$ , where  $\kappa = \lambda_1/\lambda_d$  is the condition number of the covariance matrix  $\Sigma$ .

**Accuracy.** It remains to show that this algorithm provides an accurate estimate of  $\mu$  when the data is Gaussian. We will show that the (old) error from uniform convergence and the (new) error from discretization can be grouped together, and that the  $\alpha'$  we pick results in negligible error from discretization.

Fix  $Q_{\alpha'}$  and let  $P_\Delta$  be the distribution generated by snapping samples from the Gaussian  $\mathcal{N}(\mu, \Sigma)$  to that grid. Since our uniform convergence argument holds for any distribution, with probability  $1 - \beta$  over the choice of  $x$  we have, for all  $y$  within our bounding box, that  $|T_x(y) - T_{P_\Delta}(y)| \leq \alpha_1$ , using the same “typicality” parameter as in the main argument. We now relate  $T_P(y)$  to  $T_{P_\Delta}(y)$  for all  $y$  within the bounding box.

**Lemma C.4.** *Let  $Q_{\alpha'}$  be an  $\alpha'$ -fine grid over  $[-R, R]^d$ . Let  $P = \mathcal{N}(\mu, \Sigma)$  be any Gaussian and let  $P_\Delta$  be the distribution resulting from drawing from  $P$  and then discretizing according to  $Q_{\alpha'}$ . Assume  $\hat{\lambda}_d \leq \frac{1}{4}\lambda_d(\Sigma)$ . For any point  $y \in [-R, R]^d$  and any  $\alpha_3 > 0$ , if  $\alpha' \leq c\sqrt{\frac{\hat{\lambda}_d}{d}}\alpha_3$  for some specific constant  $c$ , then*

$$|T_P(y) - T_{P_\Delta}(y)| \leq \alpha_3.$$

*Proof.* Let  $X \sim \mathcal{N}(\mu, \Sigma)$  and let  $\gamma$  be the “discretization random variable,” so  $X + \gamma \sim P_\Delta$ .

Pick a vector  $u$  such that  $\|u\|_2 = 1$ . After projecting onto  $u$ , we have a univariate random variable:  $X^T u \sim \mathcal{N}(\mu^T u, u^T \Sigma u)$ . Since  $\|\gamma\|_2 \leq \frac{\sqrt{d}\alpha'}{2}$  and  $\|u\|_2 = 1$ , by Cauchy-Schwarz we have  $\|\gamma^T u\|_2 \leq \frac{\sqrt{d}\alpha'}{2}$  as well.

The discretization can only affect the result when  $X$  is close to the hyperplane, we have

$$|\Pr[X^T u \geq y^T u] - \Pr[(X + \gamma)^T u \geq y^T u]| \leq 2\Pr[X^T u \in y^T u \pm \sqrt{d}\alpha'/2] \quad (59)$$

$$\leq 2 \cdot \frac{1}{\sqrt{2\pi u^T \Sigma u}} \cdot \frac{\sqrt{d}\alpha'}{2}. \quad (60)$$

Since  $\|u\|_2 = 1$ , we have  $\frac{1}{4}\hat{\lambda}_d \leq \lambda_d(\Sigma) \leq u^T \Sigma u$ . Setting  $\alpha'$  as in the lemma statement for a constant  $c = \sqrt{2/\pi}$  makes this value at most  $\alpha_3$ .

Since the expected Tukey depth is defined as a minimum over all  $u$ , we are done.  $\square$

We will thus be able to bound the volume ratios with an analog of Lemma 3.6.

**Lemma C.5** (Analog of Lemma 3.6). *Suppose for all  $y \in [-R, R]^d$  that  $|T_x(y) - T_{P_\Delta}(y)| \leq \alpha_1$  and  $|T_{P_\Delta}(y) - T_P(y)| \leq \alpha_3$ . Then, for all  $p, q \in [0, 1/2]$ ,*

$$\frac{\text{Vol}(\mathcal{Y}_{np,x})}{\text{Vol}(\mathcal{Y}_{nq,x})} \leq \left( \frac{\Phi^{-1}(1 - p + \alpha_1 + \alpha_3)}{\Phi^{-1}(1 - q - \alpha_1 - \alpha_3)} \right)^d.$$

*Proof.* Applying the triangle inequality, we have  $|T_x(y) - T_P(y)| \leq \alpha_1 + \alpha_3$  for all  $y \in [-R, R]^d$ .

To upper bound  $\text{Vol}(\mathcal{Y}_{np,x})$ , observe that  $T_x(y) \geq p$  implies  $T_P(y) \geq p - \alpha_1 - \alpha_3$ , so by Lemma 3.3 we have  $\|y - \mu\|_\Sigma \leq \Phi^{-1}(1 - p + \alpha_1 + \alpha_3)$ . To lower bound  $\text{Vol}(\mathcal{Y}_{nq,x})$ , observe that  $\|y - \mu\|_\Sigma \leq \Phi^{-1}(1 - q - \alpha_1 - \alpha_3)$  implies  $T_P(y) \geq q + \alpha_1 + \alpha_3$ , and thus  $T_x(y) \geq q$ .

Recalling that  $\mathcal{B}_r$  denotes the Mahalanobis ball of radius  $r$ , we have

$$\frac{\text{Vol}(\mathcal{Y}_{np,x})}{\text{Vol}(\mathcal{Y}_{nq,x})} \leq \frac{\text{Vol}(\mathcal{B}_{\Phi^{-1}(1-p+\alpha_1+\alpha_3)})}{\text{Vol}(\mathcal{B}_{\Phi^{-1}(1-q-\alpha_1-\alpha_3)})} = \left( \frac{\Phi^{-1}(1 - p + \alpha_1 + \alpha_3)}{\Phi^{-1}(1 - q - \alpha_1 - \alpha_3)} \right)^d.$$

$\square$

The earlier version of this lemma had  $\pm\alpha_1$  where we have  $\pm(\alpha_1 + \alpha_3)$ . Therefore, if  $\alpha_1$  and  $\alpha_3$  are sufficiently small, the proofs of the following lemmas go through with the exact same arguments.

**Lemma C.6** (Analog of Lemma 3.9). *Assume that for all  $y \in [-R, R]^d$ ,  $|T_x(y) - T_p(y)| \leq \alpha_1 + \alpha_3$  with  $\alpha_1 + \alpha_3 \leq \frac{1}{10}$ . There exists a constant  $c$  such that, for any  $\beta, \delta, \varepsilon > 0$  with  $\varepsilon \leq 1$  and  $\delta \leq \frac{1}{2}$ , if  $n \geq c \left( \frac{d + \log(1/\beta\delta)}{\varepsilon} \right)$  then  $x$  is  $\frac{\log(1/2\beta\delta)}{\varepsilon}$ -far from  $\text{UNSAFE}_{(\varepsilon, \delta, n/4)}$ .*

**Lemma C.7** (Analog of Lemma 3.10). *Assume that for all  $y \in [-R, R]^d$  that  $|T_x(y) - T_p(y)| \leq \alpha_1 + \alpha_3$  with  $\alpha_1 + \alpha_3 \leq \frac{1}{10}$ . For any  $\beta > 0$  and  $\alpha_2 \geq 2(\alpha_1 + \alpha_3)$ , we have, for some constant  $c$ ,*

$$\Pr_{y \sim \mathcal{M}_{n/4}(x)} \left[ T_x(y) < \frac{1}{2} - \alpha_2 \right] \leq \left( \frac{c}{\alpha_2 - 2(\alpha_1 + \alpha_3)} \right)^d e^{-\alpha_2 n \varepsilon / 4}. \quad (61)$$

Furthermore, discretizing with  $\alpha' = \frac{\sqrt{\hat{\lambda}_d} \alpha}{d}$  instead of  $O\left(\frac{\sqrt{\hat{\lambda}_d} \alpha}{\sqrt{d}}\right)$  will allow us to take  $\alpha_3 = o(\alpha)$ , so the discretization error does not affect the final sample complexity or accuracy. The only change is another additive  $3\beta$  probability of failure, since (when the data is Gaussian) our bounding box may fail to contain all data points or we may have poor eigenvalue estimates.

**Theorem C.8** (Analog of Theorem 3.2). *There exists an absolute constant  $C$  such that, for any  $0 < \alpha, \beta, \varepsilon < 1$ ,  $0 < \delta \leq \frac{1}{2}$ , mean  $\mu$ , and positive definite  $\Sigma$ , if  $x \sim \mathcal{N}(\mu, \Sigma)^{\otimes n}$  and*

$$n \geq C \left( \frac{d + \log(1/\beta)}{\alpha^2} + \frac{d \log(1/\alpha) + \log(1/\beta)}{\alpha \varepsilon} + \frac{\log(1/\delta)}{\varepsilon} \right), \quad (62)$$

*then with probability at least  $1 - 6\beta$ , Algorithm 6 returns  $\hat{\mu}$  such that  $\|\hat{\mu} - \mu\|_{\Sigma} \leq \alpha$ .*

### C.3 A Finite Implementation of Algorithm 2

The finite implementation requires that we know the target accuracy  $\alpha$  as well as an upper bound for the constant that goes into the subgaussian parameter  $c_s$ ; note that this not the case for Gaussian data, as  $c_s = 1$ .

---

**Algorithm 7** Finite Implementation of  $\mathcal{A}_{\varepsilon, \delta, \beta}^G(x)$ 


---

**Require:** Data set  $x = (x_1, \dots, x_{3n})^T \in \mathbb{R}^{3n \times d}$ . Privacy parameters:  $\varepsilon, \delta > 0$ . Accuracy parameters:  $\alpha, \beta > 0$ . Subgaussian constant  $c_s$ .

**Stage 1: Range estimates**

- 1: Construct data set  $u \in \mathbb{R}^{n \times d}$  where  $u_i = (x_i - x_{i+n})/\sqrt{2}$ ,  $i \in [n]$ .
- 2:  $\hat{\lambda}_1 \leftarrow \text{Eigen}_{\varepsilon, \delta, \beta}(u, 1)$  ▷ private estimate of largest eigenvalue
- 3:  $\hat{\lambda}_d \leftarrow \text{Eigen}_{\varepsilon, \delta, \beta}(u, d)$  ▷ private estimate of smallest eigenvalue
- 4:  $\sigma^2 \leftarrow 4c_s \hat{\lambda}_1$  ▷ upper bound on variance in every direction
- 5:  $\{X_{\min}^j, X_{\max}^j\}_{j \in [d]} \leftarrow \text{Range}_{\varepsilon, \delta, \beta}(x, \sigma^2)$
- 6: Set

$$\alpha' \leftarrow O\left(\alpha \cdot \min\left\{\frac{\hat{\lambda}_d}{\hat{\lambda}_1} \cdot \frac{1}{d^{3/2} \log(n/\beta)}, \sqrt{\frac{\hat{\lambda}_d}{d}}\right\}\right). \quad (63)$$

- 7:  $R \leftarrow \alpha' + \max_j \max\{|X_{\max}^j|, |X_{\min}^j|\}$

**Stage 2: Discretize**

- 8:  $Q_{\alpha'} \leftarrow \alpha'$ -fine grid over  $[-R, R]^d$ .
- 9: For all  $i \in [n]$ , let  $x_i^\Delta = \arg \min_{p \in Q_{\alpha'}} \|p - x_i\|_1$ .

**Stage 3: Run the algorithm.**

- 10: Run  $\mathcal{A}_{\varepsilon, \delta, \beta}^G(x^\Delta)$ .
- 

Having constructed this grid, the projection step of Algorithm  $\mathcal{A}_{\varepsilon, \delta, \beta}^G$  searches over all “good” data sets of size  $3n$  whose data points belong on the grid  $Q_{\alpha'}$ , that is, line 6 of  $\mathcal{A}_{\varepsilon, \delta, \beta}^G$  (Algorithm 2) is replaced by  $\tilde{x} \leftarrow \arg \min_{z \in \mathcal{G}(\lambda) \cap Q_{\alpha'}} D_H(\tilde{x}, z)$ .

**Privacy.** Since the discretization process doesn’t affect the privacy analysis of Algorithm 2, the overall privacy follows from composition and the privacy analysis in C.1.

**Computation.** The bottleneck in the algorithm above is the projection step, which is searching over all data sets on the grid  $Q_{\alpha'}$ , checking for each whether it is in the good set  $\mathcal{G}(\lambda)$ , and calculating its Hamming distance to  $x$ . For each data set, both these operations have running time polynomial in  $d$  and  $n$ . However, the number of data sets in the grid is roughly  $\left(\frac{2R}{\alpha'}\right)^{3dn} = \left(\frac{d\kappa(\|\mu\|_\infty + \sqrt{\lambda_1})}{\alpha}\right)^{O(dn)}$ , where  $\kappa = \lambda_1/\lambda_d$  is the condition number of the covariance matrix, making this algorithm computationally inefficient.

**Accuracy.** It suffices to show that the discretized data set is in the good set (Lemma C.11) and that the discretization adds negligible error (Lemma C.12).

First, observe that discretization (which happens coordinate-wise) has a limited effect in  $\ell_2$  norm. For each  $i \in [3n]$ , let  $x_i^\Delta = x_i + \gamma_i$ . We snap each coordinate of  $x_i$  to the nearest integer multiple of  $\alpha'$ , so  $\|\gamma_i\|_\infty \leq \alpha'/2$ , which implies  $\|\gamma_i\|_2^2 \leq d(\alpha'/2)^2$  and thus  $\|\gamma_i\|_2 \leq \frac{\sqrt{d}\alpha'}{2}$ . We now show that the discretized empirical covariance matrix is a close approximation to the original. We gather the following assumptions which we later show hold with high probability.

**Assumption C.9.** Suppose all the following conditions hold:

1. Our estimates  $\hat{\lambda}_1, \hat{\lambda}_d$  have constants  $c_1, c_2$  such that  $c_1 \hat{\lambda}_1 \geq \lambda_1(\Sigma)$  and  $c_2 \lambda_d(\Sigma) \leq \hat{\lambda}_d$ .
2. Our estimate  $\hat{\lambda}_d$  has constant  $c_3$  such that  $\hat{\lambda}_d \leq c_3 \lambda_d(\Sigma_x)$ .
3. For all  $i \in [3n]$ , we have  $\|x_i\|_\infty \leq R$ .
4. For all  $i \in [3n]$ , we have  $\|x_i - \mu\|_2 \leq c_4 \lambda_1(\Sigma) d \log(n/\beta)$  for some constant  $c_4$ .

**Lemma C.10** (Covariance after discretization). *Suppose Assumption C.9 holds. Then  $(1 - c_5)\Sigma_x \leq \Sigma_{x^\Delta} \leq (1 + c_5)\Sigma_x$  for some constant  $c_5 \in (0, 1)$ .*

*Proof.* Write  $\Sigma_{x^\Delta} = \Sigma_x + A$ . We want to prove

$$-c_5\Sigma_x \leq A \leq c_5\Sigma_x, \quad (64)$$

for which it suffices to prove  $\|A\|_2 \leq c_5\lambda_d(\Sigma_x)$ .

Let  $u_i = x_i - x_{i+n}$  be the vectors that make up the empirical covariance, and let  $u'_i = u_i + g_i$  be the discretized version. We have  $g_i = y_i - y_{i+n}$  and thus  $\|g_i\|_2 \leq 2\|y_i\|_2 \leq \sqrt{d}\alpha'$ . Then

$$\begin{aligned} A = \Sigma_{x^\Delta} - \Sigma_x &= \left( \frac{1}{2n} \sum_{i=1}^n (u_i + g_i)(u_i + g_i)^T \right) - \left( \frac{1}{2n} \sum_{i=1}^n u_i u_i^T \right) \\ &= \left( \frac{1}{2n} \sum_{i=1}^n u_i u_i^T + g_i g_i^T + g_i u_i^T + u_i g_i^T \right) - \left( \frac{1}{2n} \sum_{i=1}^n u_i u_i^T \right) \\ &= \left( \frac{1}{2n} \sum_{i=1}^n g_i g_i^T + g_i u_i^T + u_i g_i^T \right) \end{aligned}$$

Using the triangle inequality (and implicitly considering the maximum over  $i$ ), we apply Fact A.4 to bound the spectral norm.

$$\begin{aligned} \|A\|_2 &\leq \frac{1}{2} \left( \|g_i g_i^T\|_2 + \|g_i u_i^T\|_2 + \|u_i g_i^T\|_2 \right) \\ &\leq \frac{1}{2} \left( \|g_i\|_2^2 + 2\|g_i\|_2 \|u_i\|_2 \right) \\ &\leq \frac{d(\alpha')^2 + 4c_4 d^{3/2} \alpha' \lambda_1(\Sigma) \log(n/\beta)}{2}. \end{aligned} \quad (\text{by assumption})$$

Since  $\alpha' \leq 1$ , use  $(\alpha')^2 \leq \alpha'$  and simplify the upper bound to

$$\|A\|_2 \leq 3c_4 d^{3/2} \lambda_1(\Sigma) \log(n/\beta) \cdot \alpha'. \quad (65)$$

By our setting of  $\alpha'$ ,

$$\alpha' \leq \frac{1}{3c_1 c_3 c_4} \cdot \frac{\hat{\lambda}_d}{\hat{\lambda}_1} \cdot \frac{\alpha}{d^{3/2} \log(n/\beta)}. \quad (66)$$

By assumption on our estimates for  $\lambda_1(\Sigma)$  and  $\lambda_d(\Sigma_x)$ , and replacing the above  $\alpha'$  in Eq. (65), we have that  $\|A\|_2 = O(\lambda_d(\Sigma_x))$ , so there exists indeed a  $c_5$  such that  $\|A\|_2 \leq c_5 \lambda_d(\Sigma_x)$ .  $\square$

**Lemma C.11** (Analog of Lemma 4.7 and Lemma B.7). *Suppose Assumption C.9 holds. If  $x \in \mathcal{G}(\lambda)$ , then  $x^\Delta \in \mathcal{G}(\lambda')$  for some  $\lambda' = O(\lambda)$ .*

*Proof.* Attack the definition of goodness directly. For all  $i$ ,

$$\begin{aligned} \|x_i^\Delta - \mu_{x^\Delta}\|_{\Sigma_{x^\Delta}} &\leq c_6 \|x_i^\Delta - \mu_{x^\Delta}\|_{\Sigma_x} \quad (\text{by Proposition 4.4 for } c_6 = 1/\sqrt{1 - c_5}) \\ &= c_6 \|x_i^\Delta - x_i + x_i - \mu_{x^\Delta} + \mu_x - \mu_x\|_{\Sigma_x} \\ &= c_6 \|(y_i) + (x_i - \mu_x) + (\mu_x - \mu_{x^\Delta})\|_{\Sigma_x} \\ &\leq c_6 \|x_i - \mu_x\|_{\Sigma_x} + c_6 \|y_i\|_{\Sigma_x} + c_6 \|\mu_x - \mu_{x^\Delta}\|_{\Sigma_x}. \end{aligned}$$

The first term is bounded by  $c_6\lambda$ , by our assumption that  $x \in \mathcal{G}(\lambda)$ . The second term we can bound because the  $y_i$ 's have small  $\ell_2$  norm. The third term is simply an average of the  $y_i$ 's, so it will be bounded in the same manner. We have

$$\|y_i\|_{\Sigma_x} \leq \frac{1}{\sqrt{\lambda_d(\Sigma_x)}} \cdot \|y_i\|_2 \leq \sqrt{\frac{c_3}{\hat{\lambda}_d}} \cdot \frac{\sqrt{d}\alpha'}{2}. \quad (67)$$

Together, then, we have for all  $i$  that

$$\|x_i^\Delta - \mu_{x^\Delta}\|_{\Sigma_{x^\Delta}} \leq c_6 \lambda + \frac{c_6 \sqrt{c_3 d}}{\sqrt{\hat{\lambda}_d}} \cdot \alpha'. \quad (68)$$

By our setting of  $\alpha'$ , the second term is  $O(1)$ , thus  $\lambda' = O(\lambda)$ .  $\square$

The following lemma bounds the error of the estimator for input  $x^\Delta$ .

**Lemma C.12** (Analog of Lemma 4.8 and Lemma B.8). *Suppose Assumption C.9 holds. Suppose that  $x \sim P_{\mu, \Sigma}^{\otimes 3n}$ , where  $P_{\mu, \Sigma}$  is a distribution with mean  $\mu$ , covariance  $\Sigma$ , such that  $P_{\mu, \Sigma} \in \text{subG}(c_s \Sigma)$  for some constant  $c_s > 0$ . Let  $n = \Omega(\max\{(d + \log(1/\beta)), k\lambda\})$ , where parameters  $k, \lambda$  are set as in Algorithm 2. Then with probability at least  $1 - \beta$ , for  $\hat{\mu} \sim \mathcal{N}(\mu_{x^\Delta}, C^2 \Sigma_{x^\Delta})$ ,*

$$\|\hat{\mu} - \mu\|_\Sigma = O\left(\sqrt{\frac{d}{n}} \cdot \log \frac{1}{\beta} + \frac{d}{\varepsilon^2 n} \log^2 \frac{1}{\delta \beta} \cdot \sqrt{\log \frac{n}{\beta}} + \alpha\right).$$

*Proof Sketch.* Because the error of discretization is negligible, the proof of this lemma is almost identical to that of Lemma 4.8 (and of its extension to subgaussian data, Lemma B.8). To see this, apply the triangle inequality:

$$\|\hat{\mu} - \mu\|_\Sigma \leq \|\hat{\mu} - \mu_{x^\Delta}\|_\Sigma + \|\mu_{x^\Delta} - \mu_x\|_\Sigma + \|\mu_x - \mu\|_\Sigma. \quad (69)$$

By our assumption, Lemma C.11 implies that  $\exists c_5$  such that  $(1 - c_5)\Sigma_x \leq \Sigma_{x^\Delta} \leq (1 + c_5)\Sigma_x$ . By Proposition 4.4, the first term is then  $\|\hat{\mu} - \mu_{x^\Delta}\|_\Sigma = O(\|\hat{\mu} - \mu_{x^\Delta}\|_{\Sigma_{x^\Delta}})$ . The analysis of this term, and that of the third, are independent of the discretization process. They follow by mean concentration of Gaussian and subgaussian data sets respectively and are included in the proof of Lemma 4.8 and Lemma B.8. The middle term is bounded as follows

$$\|\mu_{x^\Delta} - \mu_x\|_\Sigma \leq (\lambda_d(\Sigma))^{-1/2} \|\mu_{x^\Delta} - \mu_x\|_2 \quad (70)$$

$$\leq \sqrt{\frac{c_2}{\hat{\lambda}_d}} \frac{\sqrt{d} \alpha'}{2} \quad (71)$$

$$= O(\alpha). \quad (72)$$

Therefore, this incurs only a constant factor increase in the error bound.  $\square$

We now state the accuracy guarantees of our finite implementation.

**Theorem C.13** (Accuracy of Algorithm 7). *There exists an absolute constant  $C$  such that, for any  $0 < \alpha, \beta, \varepsilon, \delta < 1$ , mean  $\mu$ , and positive definite  $\Sigma$ , if  $x \sim P_{\mu, \Sigma}^{\otimes n}$ , where  $P_{\mu, \Sigma} \in \text{subG}(c_s \Sigma)$  for some constant  $c_s > 0$ , and*

$$n \geq C \left( \frac{d}{\alpha^2} \log \frac{1}{\beta} + \frac{d}{\alpha \varepsilon^2} \log^3 \frac{1}{\delta \beta} \cdot \log \frac{d \log(1/\delta \beta)}{\alpha \varepsilon} \right), \quad (73)$$

*then with probability at least  $1 - 7\beta$ , Algorithm 2 returns  $\mathcal{A}_{\varepsilon, \delta, \beta}^G(x) = \hat{\mu}$  such that  $\|\hat{\mu} - \mu\|_\Sigma \leq \alpha$ .*

The proof of the theorem follows exactly the same steps as its counterparts for Gaussian and subgaussian distributions in Sections 4 and B respectively, combined with the analogous lemmas above. It remains to argue that Assumption C.9 holds with probability at least  $1 - 4\beta$ , and then the theorem would follow by a union bound.

Note that if  $x \sim P_{\mu, \Sigma}$  where  $P_{\mu, \Sigma}$  has mean  $\mu$ , covariance  $\Sigma$  and is subgaussian with parameter  $c_s \Sigma$ , then every coordinate is also subgaussian with parameter  $c_s \lambda_1(\Sigma)$ . By the guarantees of  $\text{Eigen}_{\varepsilon, \delta, \beta}$  (Lemma C.2), with probability  $1 - 2\beta$ , the eigenvalue estimates are good approximations of the true eigenvalues, that is,  $\frac{\lambda_1(\Sigma)}{4} \leq \hat{\lambda}_1 \leq 4\lambda_1(\Sigma)$  and  $\frac{\lambda_d(\Sigma)}{4} \leq \hat{\lambda}_d \leq 4\lambda_d(\Sigma)$ . By substituting this bound, it follows that in every coordinate  $x$

is  $4c_s\hat{\lambda}_1$ -subgaussian. Applying the guarantees of  $\text{Range}_{\varepsilon,\delta,\beta}$  (Lemma C.3) and by union bound and our choice of  $R$ , we have that with probability at least  $1 - 3\beta$ , the size of the  $d$ -dimensional box that encloses our grid is set so that all points  $x_i$  of the original data set as well as all points  $x_i^\Delta$  of the discretized dataset belong in the box, that is,  $\|x_i\|_\infty \leq R$  and  $\|x_i^\Delta\|_\infty \leq R$ . Therefore, with probability at least  $1 - 3\beta$ , item 1 and 3 of Assumption C.9 hold (for  $c_1 = 4$  and  $c_2 = 1/4$ ).

Moreover, by Lemma B.4, with probability  $1 - \beta$ , we have that for all  $i \in [3n]$ ,  $\|x_i - \mu\|_2 \leq c_4\lambda_1(\Sigma)d \log(n/\beta)$  for some constant  $c_4$  and that if  $n = \Omega(d + \log(1/\beta))$ , then  $\lambda_d(\Sigma) = \Theta(\lambda_d(\Sigma_x))$ . By the latter and since  $\hat{\lambda}_d \leq 4\lambda_d(\Sigma)$ , we have that for some constant  $c_3$ ,  $\hat{\lambda}_d \leq \frac{1}{c_3}\lambda_d(\Sigma_x)$ . Since for the stated sample complexity  $n$  satisfies this condition, we have that items 2 and 4 of Assumption C.9 hold as well.

## D Additional Proofs

### D.1 Tukey-Depth Mechanism

The mechanism fits into the well-known propose-test-release framework of [30]; privacy follows from a standard calculation. We include it here for completeness.

**Proposition D.1.** *Algorithm 1 is  $(2\varepsilon, e^\varepsilon\delta)$ -differentially private.*

*Proof.* Take adjacent  $x, x'$  and fix some subset  $B \subseteq \mathcal{Y} \cup \{\text{FAIL}\}$ . As shorthand, let  $F = \{\text{FAIL}\}$  and write  $\mathcal{A}$  in place of  $\mathcal{A}_{\varepsilon,\delta,t}^E$ .

We proceed by cases. Suppose first that  $\mathcal{M}_{\varepsilon,t}(x) \not\approx_{\varepsilon,\delta} \mathcal{M}_{\varepsilon,t}(x')$ , so running the restricted sampler may reveal too much. Then both  $x, x' \in \text{UNSAFE}$ , and for both we compute distance  $h = 0$  to unsafety. Thus

$$\begin{aligned} \Pr[\mathcal{A}(x) \in B] &= \Pr[\mathcal{A}(x) \in B \cap F] + \Pr[\mathcal{A}(x) \in B \setminus F] \\ &\leq \Pr[\mathcal{A}(x) \in B \cap F] + \Pr[\mathcal{A}(x) \notin F] \\ &\leq \Pr[\mathcal{A}(x') \in B] + \Pr[\mathcal{A}(x') \notin F], \end{aligned}$$

where the last line follows from the facts that both  $x$  and  $x'$  have the same probability of failing and that  $B \cap F \subseteq B$ . The threshold  $\frac{\log(1/2\delta)}{\varepsilon}$  is set so that the probability a Laplace random variable  $\text{Lap}(1/\varepsilon)$  exceeds it is  $\Pr[\mathcal{A}(x) \notin F] = \delta$ .

Now suppose  $\mathcal{M}_{\varepsilon,t}(x) \approx_{\varepsilon,\delta} \mathcal{M}_{\varepsilon,t}(x')$ . Since  $x$  and  $x'$  are adjacent, the distances-to-unsafety we compute under  $x$  and  $x'$  can differ by at most 1, so the probability of failing can differ by at most a factor of  $e^\varepsilon$ . We break down the probability similarly:

$$\begin{aligned} \Pr[\mathcal{A}(x) \in B] &= \Pr[\mathcal{A}(x) \in B \cap F] + \Pr[\mathcal{A}(x) \in B \setminus F] \\ &= \Pr[\mathcal{A}(x) \in B \mid \mathcal{A}(x) \in F] \Pr[\mathcal{A}(x) \in F] \\ &\quad + \Pr[\mathcal{A}(x) \in B \mid \mathcal{A}(x) \notin F] \Pr[\mathcal{A}(x) \notin F] \\ &\leq e^\varepsilon \left( \Pr[\mathcal{A}(x) \in B \mid \mathcal{A}(x) \in F] \Pr[\mathcal{A}(x') \in F] \right. \\ &\quad \left. + \Pr[\mathcal{A}(x) \in B \mid \mathcal{A}(x) \notin F] \Pr[\mathcal{A}(x') \notin F] \right). \end{aligned}$$

Since  $B$  either contains FAIL or it doesn't, we have  $\Pr[\mathcal{A}(x) \in B \mid \mathcal{A}(x) \in F] = \Pr[\mathcal{A}(x') \in B \mid \mathcal{A}(x') \in F]$ . Furthermore, since not failing means we run  $\mathcal{M}_{\varepsilon,t}(x)$ , we have

$$\begin{aligned} \Pr[\mathcal{A}(x) \in B] &\leq e^\varepsilon (\Pr[\mathcal{A}(x') \in B \cap F] + \Pr[\mathcal{M}_{\varepsilon,t}(x) \in B] \Pr[\mathcal{A}(x') \notin F]) \\ &\leq e^\varepsilon (\Pr[\mathcal{A}(x') \in B \cap F] + (e^\varepsilon \Pr[\mathcal{M}_{\varepsilon,t}(x') \in B] + \delta) \Pr[\mathcal{A}(x') \notin F]), \end{aligned}$$

applying our assumption that  $\mathcal{M}_{\varepsilon,t}(x) \approx_{\varepsilon,\delta} \mathcal{M}_{\varepsilon,t}(x')$ . To finish the proof, we simplify:

$$\begin{aligned} \Pr[\mathcal{A}(x) \in B] &\leq e^\varepsilon \Pr[\mathcal{A}(x') \in B \cap F] + e^\varepsilon e^\varepsilon \Pr[\mathcal{M}_{\varepsilon,t}(x') \in B] \Pr[\mathcal{A}(x') \notin F] + e^\varepsilon \delta \Pr[\mathcal{A}(x') \notin F] \\ &= e^\varepsilon \Pr[\mathcal{A}(x') \in B \cap F] + e^{2\varepsilon} \Pr[\mathcal{A}(x') \in B \setminus F] + e^\varepsilon \delta \Pr[\mathcal{A}(x') \notin F] \\ &\leq e^{2\varepsilon} \Pr[\mathcal{A}(x') \in B] + e^\varepsilon \delta. \end{aligned}$$

Since  $e^\varepsilon \geq 1$ , these parameters are also an upper bound for the first case. The fact that  $\Pr[\mathcal{A}(x') \in B] \leq e^{2\varepsilon} \Pr[\mathcal{A}(x) \in B] + e^\varepsilon \delta$  follows by an identical argument.  $\square$

**Proposition D.2** (Restatement of Proposition 3.3). *For any  $\mu, y \in \mathbb{R}^d$  and positive definite  $\Sigma$ ,  $T_{\mathcal{N}(\mu, \Sigma)}(y) = T_P(y) = \Phi(-\|y - \mu\|_\Sigma)$ .*

*Proof.* If  $y = \mu$ , by the symmetry of the Gaussian,  $T_P(y) = \frac{1}{2} = \Phi(0)$ . So consider  $y \neq \mu$ .

We first calculate for a given  $u$ , and then take the minimum. If  $u = 0$ , then  $\Pr[X^T u \geq y^T u] = 1$ , so assume nonzero  $u$ . We lower bound  $\Pr[X^T u > y^T u]$ , where  $X \sim P = \mathcal{N}(\mu, \Sigma)$ , and begin by rewriting the random variable to be drawn from  $\mathcal{N}(0, \mathbb{I})$ :

$$\Pr_{X \sim P}[X^T u > y^T u] = \Pr_{Z \sim \mathcal{N}(0, \mathbb{I})}[(\Sigma^{1/2} Z + \mu)^T u > y^T u].$$

We move terms to the right, multiply by  $\Sigma^{-1/2} \Sigma^{1/2}$ , and normalize by  $\|\Sigma^{1/2} u\|_2$ :

$$\begin{aligned} \Pr_{Z \sim \mathcal{N}(0, \mathbb{I})}[(\Sigma^{1/2} Z + \mu)^T u > y^T u] &= \Pr_{Z \sim \mathcal{N}(0, \mathbb{I})}[(\Sigma^{1/2} Z)^T u > (y - \mu)^T u] \\ &= \Pr_{Z \sim \mathcal{N}(0, \mathbb{I})}[Z^T (\Sigma^{1/2} u) > (\Sigma^{-1/2} (y - \mu))^T (\Sigma^{1/2} u)] \\ &= \Pr_{Z \sim \mathcal{N}(0, \mathbb{I})}[Z^T (\Sigma^{1/2} u) / \|\Sigma^{1/2} u\|_2 > (\Sigma^{-1/2} (y - \mu))^T (\Sigma^{1/2} u) / \|\Sigma^{1/2} u\|_2]. \end{aligned}$$

Let  $u' = \Sigma^{1/2} u / \|\Sigma^{1/2} u\|_2$ , and recall that, since  $u'$  is a unit vector,  $-Z^T u' \sim \mathcal{N}(0, 1)$ . We have

$$\begin{aligned} \Pr_{Z \sim \mathcal{N}(0, \mathbb{I})}[Z^T u' > (\Sigma^{-1/2} (y - \mu))^T u'] &= \Pr_{Z_1 \sim \mathcal{N}(0, 1)}[Z_1 < -(\Sigma^{-1/2} (y - \mu))^T u'] \\ &= \Phi(-(\Sigma^{-1/2} (y - \mu))^T u'). \end{aligned}$$

Since  $\Phi$  is an increasing function, the above term is minimized when  $u' = \frac{\Sigma^{-1/2} (y - \mu)}{\|\Sigma^{-1/2} (y - \mu)\|_2}$ , that is,  $u$  is a rescaling of  $\Sigma^{-1} (y - \mu)$ . With this value of  $u'$ , we see that  $T_P(y) = \Phi(-\|y - \mu\|_\Sigma)$ . Since this is strictly less than  $\frac{1}{2}$  for  $y \neq \mu$ , our exclusion of  $u = 0$  did not affect the outcome.  $\square$

## D.2 Empirically Rescaled Gaussian Mechanism

### D.2.1 Implications of Goodness

**Lemma D.3** (Restatement of Lemma 4.10). *If  $x \in \mathcal{G}(\lambda)$ , for any indices  $i, j \in [3n]$ ,*

$$(x_i - x_j)^T \Sigma_x^{-1} (x_i - x_j) \leq 4\lambda.$$

*In particular, this applies to  $u_i^T \Sigma_x^{-1} u_i$  for all  $i \in [n]$ , where  $u_i = x_i - x_{i+n}$ .*

*Proof.* Fix  $i, j \in [2n]$ . Since  $x \in \mathcal{G}(\lambda)$ ,  $\|x_i - \mu_x\|_{\Sigma_x} \leq \sqrt{\lambda}$  and  $\|x_j - \mu_x\|_{\Sigma_x} \leq \sqrt{\lambda}$ . It holds that

$$\begin{aligned} (x_i - x_j)^T \Sigma_x^{-1} (x_i - x_j) &= \|x_i - x_j\|_{\Sigma_x}^2 \\ &= \|(x_i - \mu_x) - (x_j - \mu_x)\|_{\Sigma_x}^2 \\ &\leq (\|x_i - \mu_x\|_{\Sigma_x} + \|x_j - \mu_x\|_{\Sigma_x})^2 && \text{(by triangle inequality)} \\ &\leq (2\sqrt{\lambda})^2 = 4\lambda \end{aligned}$$

This concludes the proof of the lemma.  $\square$

**Lemma D.4** (Restatement of Lemma 4.11). *Suppose  $x, y \in \mathcal{G}(\lambda)$  and  $D_H(x, y) \leq k$ , with  $2k\lambda < n$ . For any vector  $v$  we have*

$$v^T \Sigma_y^{-1} v \leq \frac{1}{1 - 2k\lambda/n} \cdot v^T \Sigma_x^{-1} v.$$

*Proof.* Define the matching paired indices  $S = \{i \in [n] : x_i = y_i \text{ and } x_{i+n} = y_{i+n}\}$ . We have  $|S| \geq n - k$ . Define  $\Sigma_{x_S} = \frac{1}{2n} \sum_{i \in S} (x_i - x_{i+n})(x_i - x_{i+n})^T$ . Note that we normalize by  $\frac{1}{2n}$  instead of  $\frac{1}{2|S|}$ . We will upper bound  $v^T \Sigma_{x_S}^{-1} v$ . This will finish the proof, since  $v^T \Sigma_y^{-1} v \leq v^T \Sigma_{x_S}^{-1} v$ . To see this fact, note that  $\Sigma_y \geq \Sigma_{x_S}$ , since  $\Sigma_y$  is  $\Sigma_{x_S}$  plus a positive semidefinite matrix. So  $\Sigma_y^{-1} \leq \Sigma_{x_S}^{-1}$  [46, Cor 7.7.4.a].

Set  $u_i = x_i - x_{i+n}$  and write

$$\Sigma_x = \Sigma_{x_S} + \frac{1}{2n} \sum_{i \in [n] \setminus S} u_i u_i^T.$$

Conjugating by  $\Sigma_x^{-1/2}$  on both sides, we have

$$\mathbb{I} = \Sigma_x^{-1/2} \Sigma_{x_S} \Sigma_x^{-1/2} + \frac{1}{2n} \sum_{i \in [n] \setminus S} \left( \Sigma_x^{-1/2} u_i \right) \left( \Sigma_x^{-1/2} u_i \right)^T \quad (74)$$

$$= \Sigma_x^{-1/2} \Sigma_{x_S} \Sigma_x^{-1/2} + \frac{1}{2n} A \quad (75)$$

defining matrix  $A$  as the sum of the second term. By the triangle inequality,

$$\|A\|_2 \leq k \cdot \max_{i \in [n] \setminus S} u_i^T \Sigma_x^{-1} u_i \leq 4k\lambda,$$

where the last inequality holds by the assumption of goodness and Lemma 4.10. By assumption,  $2k\lambda < n$ , so  $\|A\|_2 < 2n$ , which implies that  $\mathbb{I} - \frac{1}{2n}A$  is positive definite and thus invertible. This and Eq. (75) imply that  $\Sigma_{x_S}$  is also invertible. Rearranging and taking the inverse gives us

$$\Sigma_x^{1/2} \Sigma_{x_S}^{-1} \Sigma_x^{1/2} = \left( \mathbb{I} - \frac{1}{2n} A \right)^{-1}.$$

The operator norm of the above matrix is at most  $\frac{1}{1-2k\lambda/n}$ . We can use this to bound  $v^T \Sigma_{x_S}^{-1} v$ :

$$\begin{aligned} v^T \Sigma_{x_S} v &= \left( \Sigma_x^{-1/2} v \right)^T \left( \Sigma_x^{1/2} \Sigma_{x_S}^{-1} \Sigma_x^{1/2} \right) \left( \Sigma_x^{-1/2} v \right) \\ &\leq \left\| \Sigma_x^{1/2} \Sigma_{x_S}^{-1} \Sigma_x^{1/2} \right\|_2 \cdot \left\| \Sigma_x^{-1/2} v \right\|_2^2 \\ &\leq \frac{1}{1-2k\lambda/n} \cdot v^T \Sigma_x^{-1} v. \end{aligned}$$

This completes the proof.  $\square$

**Lemma D.5** (Restatement of Lemma 4.12). *Suppose  $x, y \in \mathcal{G}(\lambda)$  and  $D_H(x, y) \leq k$ , with  $2k\lambda < n$ . Then*

$$\begin{aligned} \left\| \Sigma_x^{-1/2} \Sigma_y \Sigma_x^{-1/2} - \mathbb{I} \right\|_{\text{tr}} &\leq 2k\lambda \left( \frac{1}{n-2k\lambda} + \frac{1}{n} \right) \\ \left\| \Sigma_y^{-1/2} \Sigma_x \Sigma_y^{-1/2} - \mathbb{I} \right\|_{\text{tr}} &\leq 2k\lambda \left( \frac{1}{n-2k\lambda} + \frac{1}{n} \right) \end{aligned}$$

*Proof.* Define the indices of agreement:  $S = \{i \in [n] : x_i = y_i \text{ and } x_{i+n} = y_{i+n}\}$ . Since  $D_H(x, y) \leq k$ , it holds that  $|S| \geq n - k > n(1 - 1/2\lambda)$ , where the last inequality holds by assumption. Recall  $u_i = x_i - x_{i+n}$  and define  $v_i = y_i - y_{i+n}$ . We can write, defining matrix  $A$ ,

$$\Sigma_y = \Sigma_x + \frac{1}{2n} \sum_{i \in [n] \setminus S} v_i v_i^T - \frac{1}{2n} \sum_{i \in [n] \setminus S} u_i u_i^T \stackrel{\text{def}}{=} \Sigma_x + A.$$

Conjugating by  $\Sigma_x^{-1/2}$  and subtracting  $\mathbb{I}$  from both sides, we get

$$\begin{aligned}\Sigma_x^{-1/2}\Sigma_y\Sigma_x^{-1/2} - \mathbb{I} &= \Sigma_x^{-1/2}(\Sigma_x + A)\Sigma_x^{-1/2} - \mathbb{I} \\ &= \Sigma_x^{-1/2}A\Sigma_x^{-1/2} \\ &= \frac{1}{2n} \sum_{i \in [n] \setminus S} \left( \Sigma_x^{-1/2}v_i \right) \left( \Sigma_x^{-1/2}v_i \right)^T - \frac{1}{2n} \sum_{i \in [n] \setminus S} \left( \Sigma_x^{-1/2}u_i \right) \left( \Sigma_x^{-1/2}u_i \right)^T.\end{aligned}$$

Since the trace norm satisfies the triangle inequality, we have

$$\|\Sigma_x^{-1/2}\Sigma_y\Sigma_x^{-1/2} - \mathbb{I}\|_{\text{tr}} \leq \frac{1}{2n} \sum_{i \in [n] \setminus S} \left[ \left\| \left( \Sigma_x^{-1/2}v_i \right) \left( \Sigma_x^{-1/2}v_i \right)^T \right\|_{\text{tr}} + \left\| \left( \Sigma_x^{-1/2}u_i \right) \left( \Sigma_x^{-1/2}u_i \right)^T \right\|_{\text{tr}} \right].$$

Each term in these sums is an outer product of the form  $(\Sigma_x^{-1/2}v)(\Sigma_x^{-1/2}v)^T$ . Since for every vector  $v$ ,  $\|vv^T\|_{\text{tr}} = v^T v$  (see Proposition A.4), we can write

$$\|\Sigma_x^{-1/2}\Sigma_y\Sigma_x^{-1/2} - \mathbb{I}\|_{\text{tr}} \leq \frac{1}{2n} \sum_{i \in [n] \setminus S} v_i^T \Sigma_x^{-1} v_i + u_i^T \Sigma_x^{-1} u_i.$$

By Lemma 4.10, for all  $i \in [n] \setminus S$  we have  $u_i^T \Sigma_x^{-1} u_i \leq 4\lambda$ . By Lemmas 4.10 and 4.11, for all  $i$  we have

$$v_i^T \Sigma_x^{-1} v_i \leq \frac{1}{1 - 2k\lambda/n} v_i^T \Sigma_y^{-1} v_i \leq \frac{4\lambda}{1 - 2k\lambda/n}.$$

Combining these establishes the first inequality. The second holds by a symmetrical argument.  $\square$

## D.2.2 Privacy analysis

**Proposition D.6** (Coupling and Data Order). *Suppose we have a mechanism  $\mathcal{M} = \mathcal{A} \circ \mathcal{P}$ , where  $\mathcal{P}$  randomly permutes our data and  $\mathcal{A}$  has the following privacy guarantee: for any two data sets  $\bar{x}$  and  $\bar{y}$  with  $D_H(\bar{x}, \bar{y}) \leq \xi$  and any  $O \subseteq \text{Range}(\mathcal{M}) = \text{Range}(\mathcal{A})$ ,*

$$\Pr[\mathcal{A}(\bar{x}) \in O] \leq e^\epsilon \Pr[\mathcal{A}(\bar{y}) \in O] + \delta.$$

*Then, for any  $x$  and  $y$  which differ in at most  $\xi$  points,*

$$\Pr[\mathcal{M}(x) \in O] \leq e^\epsilon \Pr[\mathcal{M}(y) \in O] + \delta.$$

*In other words, if  $\mathcal{A}$  is  $(\epsilon, \delta)$ -differentially private under the stricter Hamming distance adjacency, then  $\mathcal{M}$  is  $(\epsilon, \delta)$ -differentially private under the symmetric difference notion of adjacency.*

*Proof.* Let  $S_m$  be the set of permutations on  $m$ . For any  $x$  and  $y$  which differ in  $\xi$  points, let  $\sigma^*$  be an “aligning” permutation, such that  $D_H(x, \sigma^*(y)) = \xi$ . So we can write

$$\begin{aligned}\Pr[\mathcal{M}(x) \in O] &= \sum_{\sigma \in S_m} \frac{1}{m!} \cdot \Pr[\mathcal{A}(\sigma(x)) \in O] \\ &\leq \sum_{\sigma \in S_m} \frac{1}{m!} \cdot (e^\epsilon \Pr[\mathcal{A}(\sigma(\sigma^*(y))) \in O] + \delta),\end{aligned}$$

since  $D_H(\sigma(x), \sigma(\sigma^*(y))) = \xi$ . Furthermore, note that  $f(\sigma) \stackrel{\text{def}}{=} \sigma(\sigma^*)$  is a bijection from  $S_m$  to itself, so we can rewrite this sum as over a reordering of  $S_m$ :

$$\Pr[\mathcal{M}(x) \in O] \leq \sum_{\sigma' \in S_m} \left[ \frac{1}{m!} \cdot (e^\epsilon \Pr[\mathcal{A}(\sigma'(y)) \in O] + \delta) \right] \leq e^\epsilon \Pr[\mathcal{M}(y) \in O] + \delta.$$

This completes the proof of the lemma.  $\square$

**Corollary D.7** (Restatement of Corollary 4.14). *Algorithm 2 is  $(3\varepsilon, e^\varepsilon(1 + e^\varepsilon)\delta)$ -differentially private.*

We show that, if  $x$  and  $y$  are far from  $\mathcal{G}(\lambda)$ , then with high probability the algorithm fails. If they are close to  $\mathcal{G}(\lambda)$ , then by Theorem 4.13 the output distributions are indistinguishable.

*Proof.* Take adjacent data sets  $x$  and  $y$  and some output event  $E \in \mathbb{R}^d \cup \{\text{FAIL}\}$ . As shorthand, let  $F = \{\text{FAIL}\}$  and write  $\mathcal{A}$  in place of  $\mathcal{A}_{\varepsilon, \delta, \beta}^G$ . Recall that, by Lemma D.6, it suffices to prove privacy for  $x, y$  with Hamming distance 1.

For the first case, assume that  $\max_{z \in \{x, y\}} D_H(z, \mathcal{G}(\lambda)) \geq \frac{\log(1/\delta\beta)}{\varepsilon} + 1$ , so we know both  $D_H(y, \mathcal{G}(\lambda)) \geq \frac{\log(1/\delta\beta)}{\varepsilon}$  and  $D_H(x, \mathcal{G}(\lambda)) \geq \frac{\log(1/\delta\beta)}{\varepsilon}$ . Then, by the CDF of the Laplace distribution and the fact that we set our threshold to  $\frac{\log(1/\beta)}{\varepsilon}$ , under both  $x$  and  $y$  we have  $\Pr[\text{FAIL}] \geq 1 - \delta$ . Thus

$$\begin{aligned} \Pr[\mathcal{A}(x) \in E] &= \Pr[\mathcal{A}(x) \in E \mid \mathcal{A}(x) \in F] \Pr[\mathcal{A}(x) \in F] + \Pr[\mathcal{A}(x) \in E \mid \mathcal{A}(x) \notin F] \Pr[\mathcal{A}(x) \notin F] \\ &= \Pr[\mathcal{A}(y) \in E \mid \mathcal{A}(y) \in F] \Pr[\mathcal{A}(x) \in F] + \Pr[\mathcal{A}(x) \in E \mid \mathcal{A}(x) \notin F] \Pr[\mathcal{A}(x) \notin F] \\ &\leq \Pr[\mathcal{A}(y) \in E \mid \mathcal{A}(y) \in F] (e^\varepsilon \Pr[\mathcal{A}(y) \in F]) + 1 \cdot \delta, \end{aligned}$$

where in the first line we used the fact that  $E$  either contains FAIL or it does not, and in the second line we used (twice) the CDF of the Laplace distribution. Since

$$\Pr[\mathcal{A}(y) \in E \mid \mathcal{A}(y) \in F] \Pr[\mathcal{A}(y) \in F] = \Pr[\mathcal{A}(y) \in E \cap F] \leq \Pr[\mathcal{A}(y) \in E],$$

we have our  $(\varepsilon, \delta)$  upper bound for  $\Pr[\mathcal{A}(x) \in E]$ . The upper bound for  $\Pr[\mathcal{A}(y) \in E]$  follows from an identical argument. This finishes the first case.

For the second case, assume that  $\max_{z \in \{x, y\}} D_H(z, \mathcal{G}(\lambda)) \leq \frac{\log(1/\delta\beta)}{\varepsilon}$ , so writing  $\tilde{x}, \tilde{y}$  for the projections into  $\mathcal{G}(\lambda)$ ,

$$D_H(\tilde{x}, \tilde{y}) \leq D_H(\tilde{x}, x) + D_H(x, y) + D_H(y, \tilde{y}) \leq \frac{2 \log(1/\delta\beta)}{\varepsilon} + 1.$$

Recall that, if  $\mathcal{A}(x) \neq \text{FAIL}$ , then the algorithm samples from  $\mathcal{N}(\mu_{\tilde{x}}, C^2 \Sigma_{\tilde{x}})$ , and analogously for  $\mathcal{A}(y)$ . By Theorem 4.13, for any  $\tilde{x}, \tilde{y} \in \mathcal{G}(\lambda)$  such that  $D_H(\tilde{x}, \tilde{y}) \leq k$ , if

$$n > 2k\lambda \quad \text{and} \quad \varepsilon \geq 10k\lambda \left( \frac{1}{n - 2k\lambda} + \frac{1}{n} \right) \log \frac{2}{\delta}, \quad (76)$$

then  $\mathcal{N}(\mu_{\tilde{x}}, C^2 \Sigma_{\tilde{x}}) \approx_{2\varepsilon, (1+e^\varepsilon)\delta} \mathcal{N}(\mu_{\tilde{y}}, C^2 \Sigma_{\tilde{y}})$ . We can assume the conditions in (76) are satisfied, since otherwise the algorithm immediately aborts. Write  $u_x \sim \mathcal{N}(\mu_{\tilde{x}}, C^2 \Sigma_{\tilde{x}})$  and  $u_y \sim \mathcal{N}(\mu_{\tilde{y}}, C^2 \Sigma_{\tilde{y}})$ . We have

$$\begin{aligned} \Pr[\mathcal{A}(x) \in E] &= \Pr[\mathcal{A}(x) \in E \mid \mathcal{A}(x) \in F] \Pr[\mathcal{A}(x) \in F] + \Pr[\mathcal{A}(x) \in E \mid \mathcal{A}(x) \notin F] \Pr[\mathcal{A}(x) \notin F] \\ &\leq e^\varepsilon \Pr[\mathcal{A}(x) \in E \mid \mathcal{A}(x) \in F] \Pr[\mathcal{A}(y) \in F] + e^\varepsilon \Pr[\mathcal{A}(x) \in E \mid \mathcal{A}(x) \notin F] \Pr[\mathcal{A}(y) \notin F] \\ &= e^\varepsilon (\Pr[\mathcal{A}(y) \in E \mid \mathcal{A}(y) \in F] \Pr[\mathcal{A}(y) \in F] + \Pr[u_x \in E] \Pr[\mathcal{A}(y) \notin F]) \\ &\leq e^\varepsilon (\Pr[\mathcal{A}(y) \in E \mid \mathcal{A}(y) \in F] \Pr[\mathcal{A}(y) \in F] + (e^{2\varepsilon} \Pr[u_y \in E] + (1 + e^\varepsilon)\delta) \Pr[\mathcal{A}(y) \notin F]) \\ &\leq e^\varepsilon (e^{2\varepsilon} \Pr[\mathcal{A}(y) \in E \cap F] + e^{2\varepsilon} \Pr[\mathcal{A}(y) \in E \setminus F]) + e^\varepsilon (1 + e^\varepsilon)\delta \\ &\leq e^{3\varepsilon} \Pr[\mathcal{A}(y) \in E] + e^\varepsilon (1 + e^\varepsilon)\delta. \end{aligned}$$

An identical calculation yields the corresponding upper bound for  $\Pr[\mathcal{A}(y) \in E]$ .  $\square$
